# Outpatient regimens to reduce COVID-19 hospitalisations: a systematic review and meta-analysis of randomized controlled trials.

David J. Sullivan, Daniele Focosi, Daniel F. Hanley, Mario Cruciani, Massimo Franchini, Jiangda Ou, Arturo Casadevall, Nigel Paneth

Corresponding author: David Sullivan, 615 N. Wolfe St Rm W4606, Baltimore MD 21205. Tel 410 502 2522, fax 410 955 0105. E-mail [dsulliv7@jhmi.edu](mailto:dsulliv7@jhmi.edu).

Johns Hopkins Bloomberg School of Public Health, Department of Molecular Microbiology and Immunology, Baltimore, MD USA (Prof. D J Sullivan M.D., Prof. A Casadevall M.D.PhD.); North-Western Tuscany Blood Bank, Pisa University Hospital, Pisa, Italy (Prof. D Focosi, M.D.); Johns Hopkins University School of Medicine Department of Neurology, Brain Injury Outcomes Division, Baltimore, MD, USA (Prof. D F Hanley M.D., J Ou M.S.); Division of Hematology, Carlo Poma Hospital, Mantua, Italy (Prof. M Cruciani M.D., Prof. M Franchini M.D.); Departments of Epidemiology & Biostatistics and Pediatrics & Human Development, College of Human Medicine, Michigan State University, East Lansing, MI, USA (Prof. N Paneth, M.D., M.P.H)

Keywords: small molecule antivirals; convalescent plasma; monoclonal antibody; COVID-19; outpatients; randomized controlled trial.

Abbreviations: CCP: COVID-19 convalescent plasma; mAb: monoclonal antibody. RCT: randomized controlled trial; VOC: variant of concern.

Text word count 3485

]]

## Summary 300 words

**Background:** During pandemics, early outpatient treatments reduce the health system burden. Randomized controlled trials (RCTs) in COVID-19 outpatients have tested therapeutic agents, but no RCT or systematic review has been conducted comparing the efficacy of the main outpatient treatment classes to each other. We aimed in this systematic review of outpatient RCTs in COVID-19 to compare hospitalisation rate reductions with four classes of treatment: convalescent plasma, monoclonal antibodies, small molecule antivirals and repurposed drugs. **Methods:** We conducted a systematic review and meta-analysis of all COVID-19 outpatient RCTs that included the endpoint of progression to hospitalisation. We assembled, from multiple published and preprint databases, participant characteristics, hospitalisations, resolution of symptoms and mortality from January 2020 to May 21, 2023. The risk of bias from COVID-NMA was incorporated into the Grading of Recommendations Assessment, Development and Evaluation (GRADE) system. We measured heterogeneity with  $I^2$ . Meta-analysis by a random or fixed effect model dependent on significant heterogeneity ( $I^2 > 50\%$ ) was performed. The protocol was registered in PROSPERO, CRD42022369181.

**Findings:** The search identified 281 studies of which 54 RCTs for 30 diverse interventions were included in the final analysis. These trials, performed largely in unvaccinated cohorts during pre-Omicron waves, focused on populations with at least one COVID-19 hospitalisation risk factor. Grouping by class, monoclonal antibodies (OR=0.31 [95% CI=0.24-0.40]) had highest efficacy, followed by COVID-19 convalescent plasma (CCP) (OR=0.69 [95% CI=0.53 to 0.90]) and small molecule antivirals (OR=0.78 [95% CI=0.48-1.33]) for hospital reduction. Repurposed drugs (OR=0.82 [95% CI= 0.72-0.93]) had lower efficacy.

**Interpretation:** Inasmuch as omicron sublineages (XBB and BQ.1.1) are now resistant to monoclonal antibodies, oral antivirals are the preferred treatment in outpatients where available, but intravenous interventions from convalescent plasma to remdesivir are also effective and necessary in constrained medical resource settings or for acute and chronic COVID-19 in the immunocompromised.

**Funding:** US Department of Defense and National Institute of Health

## Research in context

### Evidence before this study

We systematically searched the published and preprint data bases for outpatient randomized clinical trials of treatment of COVID-19 disease with hospitalisation as an endpoint. Previous systematic reviews and meta-analyses have confined the reviews to specific classes such as convalescent plasma, monoclonal antibodies, small molecule antivirals or repurposed drugs. Few comparisons have been made between these therapeutic classes. The trials took place both in the pre-vaccination and the vaccination era, spanning periods with dominance of different COVID variants. We sought to compare efficacy between the four classes of treatments listed above when used in outpatient COVID-19 patients as shown in randomized, placebo-controlled trials.

### Added value of this study

This systematic review and meta-analysis brings together trials that assessed hospitalisation rates in diverse COVID-19 outpatient populations varying in age and comorbidities, permitting us to assess the efficacy of interventions both within and across therapeutic classes. While heterogeneity exists within and between these intervention classes, the meta-analysis can be placed in context of trial diverse populations over variant time periods of the pandemic. At present most of the world population has either had COVID-19 or been vaccinated with a high seropositivity rate, indicating that future placebo-controlled trials will be limited because of the sample sizes required to document hospitalisation outcomes.

### Implications of all the available evidence

Numerous diverse therapeutic tools need to be ready for a resilient response to changing SARS-CoV-2 variants in both immunocompetent and immunocompromised COVID-19 outpatient populations. To date few head-to-head randomized controlled trials (RCTs) has compared treatment options for COVID-19 outpatients, making comparisons and treatment choices difficult. This systematic review compares outcomes among RCTs of outpatient therapy for COVID-19, taking into account time between onset of symptoms and treatment administration. We found that small-chemical antivirals, convalescent plasma and monoclonal antibodies had comparable efficacy between classes and amongst interventions within the four classes. Monoclonals have lost efficacy with viral mutation, and chemical antivirals have contraindications and adverse events, while intravenous interventions like convalescent plasma or remdesivir remain resilient options for the immunocompromised, and, in the case of CCP, in resource constrained settings with limited availability of oral drugs.

## INTRODUCTION

By May 17, 2023 the world had recorded over 766 million cases and more than 6.9 million deaths from COVID-19. In the US, some 100 million cases have been recorded, with over a million deaths, while six million hospital admissions for COVID took place between August 2020 and December 2022. A pronounced spike in hospitalisations for COVID-19 in the US took place in the first two months of 2022 with the arrival of the Omicron variant of concern (VOC). Several approaches to reducing the risk of hospitalisation have been taken during the pandemic, including administering COVID-19 convalescent plasma (CCP), monoclonal antibodies (mAbs), small molecule antivirals or repurposed drugs. Vaccination and boosters have substantially reduced the hospitalisation and death risk, but outpatients at elevated severe COVID risk can still benefit from early treatment to avoid hospitalisation. Randomized controlled trials (RCTs) in outpatients have tested therapeutic agents against placebo or standard of care, but very few RCTs have been conducted that compare the main outpatient treatment classes.

The first outpatient treatments for COVID-19 authorized by the FDA were for mAbs (bamlanivimab, bamlanivimab plus etesevimab<sup>1</sup> or casirivimab plus imdevimab<sup>2</sup>), approvals that preceded the introduction of mRNA vaccines<sup>3,4</sup>. While many small molecules were repurposed as antivirals during the early stages of the pandemic, oral antivirals developed against SARS-CoV-2 for outpatients were not authorized and available until December 2021, when nirmatrelvir/ritonavir<sup>5</sup> and molnupiravir<sup>6</sup> were approved. The following month, intravenous remdesivir was also approved for outpatient use<sup>7</sup>. On December 2021, nearly two years after the first use of CCP, the FDA approved CCP outpatient use, but only for immunocompromised patients<sup>8,9</sup>. The mAbs have been withdrawn due to viral variants BQ.1.\* and XBB.\* resistance. Here we assemble outpatient RCTs of COVID-19 different therapies, sharing either all cause or COVID-19 related hospitalisation for an endpoint. A literature search of MEDLINE (through PubMed), medRxiv and bioRxiv databases was carried out aiming to include all such RCTs published from March 2020 to October 2022 and these are summarized in the PRISMA chart (Figure 1). This systematic review and meta-analysis of outpatient COVID-19 RCTs, compared outcomes amongst CCP, mAbs, antivirals or repurposed drugs taking into account risk factors for progression, intervention dosage, time between symptom onset and treatment administration, and predominant variants of concern during RCTs.

## METHODS

The protocol has been registered in PROSPERO, the prospective register of systematic reviews and meta-analyses of the University of York (protocol registration number CRD42022369181). We assembled outpatient COVID-19 RCTs with hospitalisation or a single CCP study with life-threatening respiratory distress<sup>10</sup> as the outcome, by searching MEDLINE (through PubMed), medRxiv and bioRxiv databases for the period of March 1, 2020 to May 22, 2022, with English language as the only restriction. The Medical Subject Heading (MeSH) and search query used were: “(“COVID-19” OR “SARS-CoV-2” OR “coronavirus disease 2019”) AND (“treatment” OR “therapy”) AND (“outpatient”) AND (“hospitalisation”)” AND (“randomized clinical trial”). We also screened the reference list of reviewed articles for studies not captured in our initial search. We excluded case reports, case series, retrospective, propensity-matched studies, non-randomized clinical trials, review articles, meta-analyses, studies with fewer than 30 participants, studies that did not record or had no hospitalisations. and articles reporting only aggregate data. Trials of COVID prevention<sup>11</sup> were excluded, even if hospitalisations were recorded. Articles underwent a blind evaluation for inclusion by two assessors (D.S. and D.F.) and disagreements

were resolved by a third senior assessor (A.C.). Figure 1 shows a PRISMA flowchart of the literature reviewing process. The following parameters were extracted from studies: baseline SARS-CoV-2 serology status, time from onset of symptoms to treatment, study dates, recruiting countries, gender, age (including the fraction of participants over age 50, 60 and 65), ethnicity, risk factors for COVID-19 progression (systemic arterial hypertension, diabetes mellitus, and obesity), sample size, dosage type of control, hospitalisations and deaths in each arm, and time to symptom resolution. Study dates were used to infer predominant VOCs.

#### Assessment of risk of bias and GRADE assessment

A risk of bias assessment of each selected RCT was performed by COVID-19-NMA initiative<sup>12,13</sup>. Within-trial risk of bias was assessed, using the Cochrane ROB tool for RCTs<sup>14</sup>. We explored clinical heterogeneity (e.g., risk factors for progression, time between onset of symptoms and treatment administration, and predominant variants of concern at the time of the interventions) and calculated statistical heterogeneity using  $\tau^2$ , Cochran's Q and estimated this using the  $I^2$  statistic, which examines the total variation percentage across studies due to heterogeneity rather than chance.

We used the GRADE (The Grading of Recommendations Assessment, Development and Evaluation) system criteria to assess the quality of the body of evidence associated with specific outcomes, and constructed a 'Summary of Findings' table (Appendix Table 3), which defines the certainty of a body of evidence as the extent to which one can be confident that an estimate of effect or association is close to the true quantity of specific interest<sup>14</sup>. Publication bias was assessed by visual inspection of funnel plots.

#### Statistical methods

Descriptive analysis included time-to-treatment, geography (country) of the study, age, sex, race, ethnicity, seropositive, hospital type and medical high-risk conditions. The unweighted pooling ARR, RRR, NNT were calculated based on the arithmetic summation of the total hospitalisation or death numbers in each therapeutic category.

Odds ratios (OR) and 95% confidence intervals (CI) were used to show the direction of effect and its significance in comparing treatment group and control groups. The studies were weighted with the Mantel-Haenszel method. The effect heterogeneity was calculated estimating the I-squared ( $I^2$ ) inconsistency index. If significant heterogeneity was detected ( $I^2 > 50\%$  and Cochran's Q test for heterogeneity was significant ( $p < 0.10$ )), a random effect model was performed; otherwise, a fixed (common) effect model was performed. Weight, heterogeneity, between-study variance, and significance level were displayed in forest plots.

The significance level was 0.05. The figures were created in Prism software, R (version 4.2.1) and its statistical package "meta" (version 6.0-0). All the data manipulation and the analyses were performed in Excel, Prism, MedCalc (version 20.106), R and REVMAN.5.

#### Role of the funding source

The study sponsors did not contribute to the study design; to the collection, analysis, and interpretation of data; to manuscript preparation, nor to the decision to submit the paper for publication.

## RESULTS

## TRIAL CHARACTERISTICS

We reviewed in detail 54 distinct outpatient RCTs (30 different interventions), conducted from March 2020 to May 22, 2023, across waves sustained by different SARS-CoV-2 variants of concern (VOC) and different vaccination periods in diverse patient populations (Figure 2). The studies varied in reporting outcomes of hospitalisation, whether all-cause or COVID-19 related. The CCP group included 3 RCTs with all-cause hospitalisation, 2 trials with COVID-19 related hospitalisations only and one trial with life-threatening respiratory distress in elderly individuals, deemed equivalent to hospital outcome (Appendix Table 1). The mAb RCTs included 3 trials with all-cause hospitalisations and 5 that used COVID-19 related hospitalisations as the outcome. The small molecule antivirals had 6 RCTs with all-cause hospitalisations and 5 with COVID-19 related hospitalisations, while 17 RCT's of repurposed drugs used all-cause hospitalisations and 10 trials restricted to COVID-19 related hospitalisations. Here we report the hospitalisations as a composite of the hospital types. Because inclusion criteria varied across the RCTs, the power to detect a difference in hospitalisation rates varied across studies. Three CCP RCTs had higher control arm hospitalisation rates (11% - 31%) than all other antiviral RCTs, indicating that they studied sicker populations.<sup>9</sup> (Table 1 and Figure 3). The six mAb RCTs had hospitalisation rates in the controls of 4.6-8.9%, the same range as CSSC-004<sup>9</sup> (6.3%). Control hospitalisation rates in the molnupiravir-MOVE-OUT<sup>7</sup>, nirmatrelvir/ritonavir<sup>5</sup> and remdesivir<sup>15</sup> RCTs ranged from 5.3% to 9.7%. Low hospitalisation rates were found in RCTs that had many vaccinees (metformin-COVID-OUT – 3.2%<sup>16</sup>) or in which most participants were seropositive (molnupiravir-PANORAMIC – 0.8%). Low control arm hospitalisation rates were also found in two mAb RCTs – the bebtelovimab trial (1.6%)<sup>17</sup> and REGN-CoV phase 1/2 (<2%), with the bebtelovimab RCT focusing on low-risk patients<sup>17</sup>

## TRIAL FINDINGS

Examining RCTs by agent class, statistically significant relative risk reductions in hospitalisation were found in two of five CCP RCTs, six of nine mAb RCTs, four of 17 small molecule antiviral RCTs, but just 2 of 39 repurposed drug RCTs (Appendix Table 2). Except for the bebtelovimab RCT (2 hospitalisations in each arm<sup>17</sup>), mAb RCTs reduced the risk of hospitalisation by 50-80% (average 75%). Two of the three small molecule antiviral drugs (remdesivir<sup>15</sup> and nirmatrelvir/ritonavir<sup>5</sup>) showed very high levels of relative risk reduction - 87% and 88% respectively - but molnupiravir reduced risk of hospitalisation by only 30%<sup>7</sup> (no reduction in the PANORAMIC RCT<sup>25</sup>). The lopinavir/ritonavir combination was associated with a non-significant increase in risk of hospitalisation<sup>18</sup>.

Among repurposed drug RCTs, all except metformin (58%) and sulodexide (40%), showed small and non-significant relative risk reductions of hospitalisation - ivermectin<sup>19</sup>, colchicine<sup>20</sup>, fluvoxamine<sup>21</sup> and hydroxychloroquine<sup>18</sup>. The nitazoxanide<sup>22</sup> RCT found one hospitalisation among 184 treated participants compared to five hospitalisations among 195 controls, too few events to achieve significance.

Absolute risk reductions (ARR) and number needed to treat (NNT) to avert hospitalisations varied across studies and treatment classes (Appendix Table 2). In general, except for the repurposed drugs the absolute risk difference approximated 3% if one excludes the molnupiravir-Panoramic Study from SMA. The CCP RCTs had an ARR of 3.2% (95%CI-0.9-5.6), mAbs RCTs had an ARR of 4.0% (95%CI-3.2-4.8), small molecule antivirals excluding molnupiravir-Panoramic had ARR of 2.1% (95%CI-1.3-2.9) and the repurposed drugs had a smaller ARR at



1.1% (95%CI=0.5-1.6). The number needed to treat to prevent hospitalisations approximated 30 in the trials, with a few notably low with CCP-Argentina (NNT=7) Nirmatrelvir/ritonavir (NNT=18), except those using repurposed drugs, where NNT averaged 70 (Appendix Table 2). In the pooled meta-analysis by class group, the CCP RCTs had a fixed effect OR of 0.69 (95% CI=0.53 to 0.9) with moderate heterogeneity ( $I^2=43\%$ ), the mAbs had a fixed effect OR of 0.31 (95% CI=0.24-0.40) with low heterogeneity ( $I^2=0\%$ ), the small molecule antivirals had a random effect OR of 0.78 (95% CI=0.48-1.33) with high heterogeneity ( $I^2=69\%$ ) and the repurposed drugs had a random effect OR of 0.82 (95% CI= 0.72-0.93) with low heterogeneity ( $I^2=0\%$ ) (Figure 4, Appendix Table 2). A biologic reason to use a fixed model for CCP and mAbs is that both formulations have the same active agent as specific antibody and thus there is a high degree of similarity in these two antibody interventions. Both antiviral small molecules and repurposed drugs comparison involve many types and classes of drugs for which the random effect model for the group is biologically more plausible than treating them as fixed. The meta-analysis of all interventions had a random effect OR of 0.67 (95% CI=0.57-0.80) with high heterogeneity ( $I^2=52\%$ ) (Appendix Figure 2). Within the CCP RCTs excluding either CCP-Argentina for the nonhospital endpoint or CONV-ERT for methylene blue inactivation of antibody function only changed the OR by 0.05 with 95% CI remaining less than 1 for the fixed effect model (Appendix Figure 3A,B). Adding the 7 all-cause hospitalisations to CSSC-004, increased the OR by 0.02 and 95% CI by 0.01, essentially no change (Appendix Figure 3C).

Ten RCTs compared hospitalisation rates in early or late interventions (dated from symptom onset) that were extractable from the published papers or supplementary data as a post-hoc analysis (Figure 5). The small molecule drugs showed no significant reduction in the OR with segregation of early treatment from late treatment. In contrast, the antibody therapies showed a difference by treatment timing. Pooling the two classes of antibody treatment, the OR for early treatment was 0.65 (95%CI=0.49-0.85), while the OR for later treatment was 0.86 (95%CI=0.66-1.12).

All four trial classes showed reduced rates of hospitalisation for each group. The final certainty of the available evidence with GRADE assessment (Appendix Table 4) showed a high certainty level within CCP trials, moderate certainty with mAbs, and low certainty with small molecule antivirals and repurposed drugs. The main reason for downgrading individual and pooled studies was imprecision, related to small number of participants and the wide confidence intervals around the effect, followed by ROB (Appendix Figure 4). We did not find concerns in any of the GRADE factors for CCP RCTs so we graded them as high level of certainty. mAbs were downgraded to moderate certainty due to ROB (in 4 of the 8 included RCTs, ROB for the outcome hospitalisation was judged of some concern). In the cumulative analysis, small molecule antivirals were downgraded to low certainty of evidence because of ROB (some/high ROB in 4 RCTs) and inconsistency (due to high heterogeneity), while repurposed drugs were downgraded to low certainty due to ROB (some/high ROB in 5 of the 11 comparisons) and indirectness (due to large difference in mechanism of action of the included drugs). The ROB was independently evaluated by the COVID-19-Network Meta-Analysis (NMA) initiative for most of the RCTs (Appendix Figure 4 and full output ROB in Supplementary Information). Funnel plot analysis shows a low risk of publication bias except for the mAbs, for which either the efficacy of high dose antibodies or non-reporting bias are plausible explanations (Appendix Figure 5).

While several RCTs showed fewer deaths in the treatment arm, no outpatient study was powered to compare differences in mortality. Because of the low rate of deaths during trials the absolute

risk reductions amongst the 4 antiviral classes are all below 1% corresponding to relative risk reductions of 20%, 81%, 87% and 22% for CCP, mAbs, small molecule antivirals or repurposed drugs, respectively (Appendix Table 4).

## TIME TO RESOLUTION

The two most effective CCP RCTs (Argentina<sup>10</sup> and CSSC-004<sup>9</sup>) did not compare time to symptom resolution, while the COV-Early<sup>23</sup> and ConV-ert<sup>24</sup> RCTs reported no difference in the median time of symptom resolution in the two groups<sup>24</sup> (Appendix Table 2). The mAbs noted faster resolution by 1, 2, 3, 4 or 5 days for bamlanivimab/etesevimab<sup>25</sup>, bebtelovimab<sup>17</sup>, regdanvimab<sup>26</sup>, casirivimab/imdevimab<sup>2</sup>, or redanvimab<sup>27</sup> respectively. The smaller bamlanivimab-only RCT did not show a difference<sup>1</sup>. Of the three SMAs that noted reductions in hospitalisations, molnupiravir was associated with no difference in time of symptom resolution in MOVE-OUT<sup>7</sup> but improvements in both PANORAMIC<sup>25</sup> and Aurobindo<sup>27</sup> RCTs. The 3-day outpatient remdesivir RCT showed that symptoms were alleviated by day 14 nearly twice as often<sup>15</sup>. The nirmatrelvir/ritonavir RCT did not report on this parameter<sup>5</sup>. Seven of 10 RCTs in the antiviral group did not show faster symptom resolution with intervention. The three RCTs largely performed in Brazil for fluvoxamine, ivermectin<sup>19</sup> and hydroxychloroquine<sup>18</sup> noted no differences in symptom resolution. Metformin did not evidence faster symptom resolution despite reducing hospitalisations. Three of the 25 RCTs reporting symptom resolution in the repurposed drug group noted faster symptom resolution.

## COSTS

mAbs and intravenous remdesivir schedules cost about 1000 to 2000 Euros per patient, respectively, while the oral drugs are much less than 1000 Euros per patient (Table 1). By comparison, the cost of CCP approximates 200 Euros per patient, and the cost for repurposed drugs is even lower. Considering the absolute risk reduction in hospitalisation, the number needed to treat to prevent a single hospitalisation is often very high, as are the associated costs. With the recently patented antivirals, costs for outpatient treatment often exceed the cost of a COVID-19 hospitalisation<sup>28</sup>.

mAbs successively lost efficacy against Delta and Omicron, with cilgavimab (the only Omicron-active ingredient in Evusheld<sup>TM</sup>) and bebtelovimab also failing against BQ.1.1 and XBB.\* sublineages (Figure 6). This has led the FDA to withdraw EUAs, while EMA has not restricted usage at all. Small molecule antivirals retain *in vitro* efficacy against Omicron, but concerns remain: molnupiravir showed low efficacy *in vivo*<sup>6</sup> and is mutagenic for mammals *in vitro*<sup>29</sup>, while nirmatrelvir/ritonavir has drug/drug interaction contraindications (CYP3 metabolites especially tacrolimus, anti-cholesterol, anti-migraine or many anti-depressants) and has been associated with early virological and clinical rebounds in immunocompetent patients<sup>30</sup>. CCP from unvaccinated donors does not inhibit Omicron, but CCP from donors having any sequence of vaccination and recent, within 6 months, COVID-19 or having had boosted mRNA vaccine doses universally has high Omicron-neutralizing activity.

## DISCUSSION

The pharmaceutical industry – with well-established internal resources for trials and substantial economic support – was able to perform large outpatient trials of mAbs early in the pandemic. Inpatient services are generally more accessible to physician-scientists working in academic medical centers. The relative ease of conducting inpatient RCTs may have led most initial CCP,



small molecule antiviral and repurposed trials – which were conducted principally by academic institutions - to be based in hospitals, often in patients treated too late for antiviral treatment to be expected to work, given that antiviral therapy must be given early in disease. The constrained resources available for clinical research by academic medicine during pandemic conditions further interfered with trial work, and several potentially valuable RCT's with promising findings were terminated before they could provide definitive data. The findings of such trials are reported as null but often viewed as negative, notwithstanding trends towards effectiveness, and are rarely incorporated into clinical recommendations.

Consistent with the above, outpatient RCT data confirm that most antiviral/antimicrobial therapies are more effective when given before hospital admission. In examining the full assembly of these effective, yet molecularly disparate interventions, we note the consistent importance of early outpatient treatment for patients at risk of progression to hospitalisation<sup>31</sup>. Treatment within 5 days of illness onset was more effective than later treatment, as would be expected for an antiviral mechanism of action. An individual participant meta-analysis of CCP that investigated the effects of early compared to late treatment and of high compared to low dose antibody levels found that both early treatment and high levels of antibody combined to most effectively reduce risk of hospitalisations<sup>32</sup>.

The paucity of head-to-head RCT comparisons amongst outpatient COVID-19 therapies, however, makes the choice of therapy difficult. The outpatient RCTs reviewed here were conducted during different time-periods during the pandemic, thus targeting different variants, and enrolled participants with different vaccination statuses. Further heterogeneity was contributed by variation across the 54 RCTs, in participant age, medical risk factors and serological status. These limitations need to be considered in our head-to-head meta-analysis of COVID-19 outpatient placebo controlled RCTs.

The choice, however, has been narrowed in recent months, and the clinical armamentarium has been reduced to small molecule antivirals, repurposed drugs and CCP, because single and double (“cocktail”) MAb have lost effectiveness against new VOCs<sup>33</sup>. Both vaccine-elicited and disease-elicited antibodies are polyclonal, meaning that they include various isotypes that provide functional diversity and target numerous epitopes making variant escape much more difficult with CCP. Hence, polyclonal antibody preparations are much more resilient to the relentless evolution of variants. This is in marked contrast to mAbs, which target single epitopes of SARS-CoV-2. The exquisite mAb (and receptor binding domain) specificity renders mAbs susceptible to becoming ineffective with single amino acid changes. Plasma from individuals who have been both vaccinated and boosted is characterized by high amounts of neutralizing antibodies which can be effective against practically any existing VOC, including Omicron<sup>34</sup> (so-called “heterologous immunity”, likely due to the well-known phenomenon of “epitope spreading”). Vaccine-boosted CCP has more than ten times the amount of total SARS-CoV-2 specific antibody and viral neutralizing activity compared to the pre-omicron CCP used in the effective outpatient CCP RCTs.

In addition to efficacy, other points to consider in an outpatient pandemic are tolerability, scalability and affordability. Repurposed drugs are generally well tolerated, widely available and relatively inexpensive, but, as we have shown, have limited efficacy. By contrast, small molecule antivirals are often plagued by contraindications and side effects, which make several classes of patients reliant on passive immunotherapies. Both small molecule antivirals and mAbs take time to develop and are unaffordable in low-and-middle income countries (LMIC). CCP is instead a

tolerable, scalable, and affordable treatment and is usually provided in a single IV session, in contrast to Remdesivir, which requires a three-day intravenous course.

On Dec. 28, 2021 the FDA expanded the authorized emergency use of convalescent plasma with high titers of anti-SARS-CoV-2 antibodies “for the treatment of COVID-19 in patients with immunosuppressive disease or receiving immunosuppressive treatment, in either the outpatient or inpatient setting.” This EUA noted that CCP was safe and effective in immunocompetent individuals and allowed under the emergency measure of the pandemic, but expanded its use in immunosuppressed individuals to outpatient use, notwithstanding the availability of oral drugs and (at that time) two remaining effective mAb treatments for the new omicron variants of concerns

The published mAbs RCTs assembled here showed better efficacy than other outpatient interventions, yet are now clinically ineffective against BQ.1.\* and XBB.\* Omicron variants. CCP and small molecule antivirals have comparable levels of effectiveness, but the latter have many contraindications and side effects. Repurposed drugs are either ineffective or mildly effective. That leaves CCP, which is especially important in the immunosuppressed but, as the trials show, early treatment with high levels of antibody, has value in other populations as well. Our clinical recommendation from this review is to use CCP on an out-patient basis in regions with no other therapy available regardless of vaccination status for those at high risk of progression to hospitalisation.

## FUNDING

This study was supported by the U.S. Department of Defense’s Joint Program Executive Office for Chemical, Biological, Radiological and Nuclear Defense (JPEO-CBRND), in collaboration with the Defense Health Agency (DHA) (contract number: W911QY2090012) (DS, AC, DH), with additional support from Bloomberg Philanthropies, State of Maryland, the National Institutes of Health (NIH) National Institute of Allergy and Infectious Diseases 3R01AI152078-01S1 (DS, AC), NIH National Center for Advancing Translational Sciences U24TR001609-S3 and UL1TR003098 (DH).

## CONTRIBUTORS

DS wrote the first draft and extracted data verified by DF, and MF. DF curated Table 3 and 7 and revised the text. MC, JO, MF and DS performed statistical analyses. MC and DS performed GRADE assessment. AC, NP, MF and DH critically revised the manuscript. DS and DF directly accessed and verified the underlying data reported here. All authors read and agree with manuscript.

## DECLARATION OF INTERESTS

DS, DFH, AC were investigators in the CSSC-004 study; D.F. and M.F. were investigators in the TSUNAMI RCT of CCP. DJS reports AliquantumRx Founder and Board member with stock options (macrolide for malaria), Hemex Health malaria diagnostics consulting and royalties for malaria diagnostic test control standards to Alere- all outside of submitted work. AC reports being part of the scientific advisory board of SabTherapeutics and has received personal fees from Ortho Diagnostics, outside of the submitted work. All other authors report no relevant disclosures.

## DATA SHARING

Datasets used for this systematic review are publicly available in PubMed, medRxiv and bioRxiv.

## REFERENCES

1. Chen P, Nirula A, Heller B, et al. SARS-CoV-2 Neutralizing Antibody LY-CoV555 in Outpatients with Covid-19. *N Engl J Med* 2021; **384**(3): 229-37.
2. Weinreich DM, Sivapalasingam S, Norton T, et al. REGEN-COV Antibody Combination and Outcomes in Outpatients with Covid-19. *N Engl J Med* 2021; **385**(23): e81.
3. Polack FP, Thomas SJ, Kitchin N, et al. Safety and Efficacy of the BNT162b2 mRNA Covid-19 Vaccine. *N Engl J Med* 2020; **383**(27): 2603-15.
4. Anderson EJ, Roupheal NG, Widge AT, et al. Safety and Immunogenicity of SARS-CoV-2 mRNA-1273 Vaccine in Older Adults. *N Engl J Med* 2020; **383**(25): 2427-38.
5. Hammond J, Leister-Tebbe H, Gardner A, et al. Oral Nirmatrelvir for High-Risk, Nonhospitalized Adults with Covid-19. *N Engl J Med* 2022; **386**(15): 1397-408.
6. Jayk Bernal A, Gomes da Silva MM, Musungaie DB, et al. Molnupiravir for Oral Treatment of Covid-19 in Nonhospitalized Patients. *N Engl J Med* 2022; **386**(6): 509-20.
7. FDA. FDA Takes Actions to Expand Use of Treatment for Outpatients with Mild-to-Moderate COVID-19. In: FDA, editor.; 2022.
8. O'Shaughnessy JA. Convalescent Plasma EUA Letter of Authorization 12282021 . FDA website (<https://www.fda.gov/media/141477/download>); 2021.
9. Sullivan DJ, Gebo KA, Shoham S, et al. Early Outpatient Treatment for Covid-19 with Convalescent Plasma. *N Engl J Med* 2022.
10. Libster R, Perez Marc G, Wappner D, et al. Early High-Titer Plasma Therapy to Prevent Severe Covid-19 in Older Adults. *N Engl J Med* 2021; **384**(7): 610-8.
11. O'Brien MP, Forleo-Neto E, Musser BJ, et al. Subcutaneous REGEN-COV Antibody Combination to Prevent Covid-19. *New England Journal of Medicine* 2021; **385**(13): 1184-95.
12. Nguyen TV, Ferrand G, Cohen-Boulakia S, et al. RCT studies on preventive measures and treatments for COVID-19. *Zenodo* 2020.
13. Boutron I, Chaimani A, Meerpohl JJ, et al. The COVID-NMA Project: Building an Evidence Ecosystem for the COVID-19 Pandemic. *Ann Intern Med* 2020; **173**(12): 1015-7.
14. JPT H, S G, editors. Cochrane Handbook for Systematic Reviews of Interventions Version 5.1.0: [www.handbook.cochrane.org](http://www.handbook.cochrane.org); 2011.
15. Gottlieb RL, Vaca CE, Paredes R, et al. Early Remdesivir to Prevent Progression to Severe Covid-19 in Outpatients. *N Engl J Med* 2022; **386**(4): 305-15.
16. Bramante CT, Huling JD, Tignanelli CJ, et al. Randomized Trial of Metformin, Ivermectin, and Fluvoxamine for Covid-19. *N Engl J Med* 2022; **387**(7): 599-610.
17. Dougan M, Azizad M, Chen P, et al. Bebtelovimab, alone or together with bamlanivimab and etesevimab, as a broadly neutralizing monoclonal antibody treatment for mild to moderate, ambulatory COVID-19. *medRxiv* 2022: 2022.03.10.22272100.
18. Reis G, Moreira Silva E, Medeiros Silva DC, et al. Effect of Early Treatment With Hydroxychloroquine or Lopinavir and Ritonavir on Risk of Hospitalization Among Patients With COVID-19: The TOGETHER Randomized Clinical Trial. *JAMA Netw Open* 2021; **4**(4): e216468.
19. Reis G, Silva E, Silva DCM, et al. Effect of Early Treatment with Ivermectin among Patients with Covid-19. *N Engl J Med* 2022.

20. Tardif JC, Bouabdallaoui N, L'Allier PL, et al. Colchicine for community-treated patients with COVID-19 (COLCORONA): a phase 3, randomised, double-blinded, adaptive, placebo-controlled, multicentre trial. *Lancet Respir Med* 2021; **9**(8): 924-32.
21. Reis G, Dos Santos Moreira-Silva EA, Silva DCM, et al. Effect of early treatment with fluvoxamine on risk of emergency care and hospitalisation among patients with COVID-19: the TOGETHER randomised, platform clinical trial. *Lancet Glob Health* 2022; **10**(1): e42-e51.
22. Rossignol JF, Bardin MC, Fulgencio J, Mogelnicki D, Brechot C. A randomized double-blind placebo-controlled clinical trial of nitazoxanide for treatment of mild or moderate COVID-19. *EClinicalMedicine* 2022; **45**: 101310.
23. Millat-Martinez P, Gharbharan A, Alemany A, et al. Prospective individual patient data meta-analysis of two randomized trials on convalescent plasma for COVID-19 outpatients. *Nature Communications* 2022; **13**(1): 2583.
24. Alemany A, Millat-Martinez P, Corbacho-Monne M, et al. High-titre methylene blue-treated convalescent plasma as an early treatment for outpatients with COVID-19: a randomised, placebo-controlled trial. *Lancet Respir Med* 2022; **10**(3): 278-88.
25. Dougan M, Nirula A, Azizad M, et al. Bamlanivimab plus Etesevimab in Mild or Moderate Covid-19. *N Engl J Med* 2021; **385**(15): 1382-92.
26. Streinu-Cercel A, Sandulescu O, Preotescu LL, et al. Efficacy and Safety of Regdanvimab (CT-P59): A Phase 2/3 Randomized, Double-Blind, Placebo-Controlled Trial in Outpatients With Mild-to-Moderate Coronavirus Disease 2019. *Open Forum Infect Dis* 2022; **9**(4): ofac053.
27. Kim JY, Sandulescu O, Preotescu LL, et al. A Randomized Clinical Trial of Regdanvimab in High-Risk Patients With Mild-to-Moderate Coronavirus Disease 2019. *Open Forum Infect Dis* 2022; **9**(8): ofac406.
28. Oldenburg CE, Pinsky BA, Brogdon J, et al. Effect of Oral Azithromycin vs Placebo on COVID-19 Symptoms in Outpatients With SARS-CoV-2 Infection: A Randomized Clinical Trial. *JAMA* 2021; **326**(6): 490-8.
29. Zhou S, Hill CS, Sarkar S, et al. beta-d-N4-hydroxycytidine Inhibits SARS-CoV-2 Through Lethal Mutagenesis But Is Also Mutagenic To Mammalian Cells. *J Infect Dis* 2021; **224**(3): 415-9.
30. Gupta K, Strymish J, Stack G, Charness M. Rapid Relapse of Symptomatic SARS-CoV-2 Infection Following Early Suppression with Nirmatrelvir/Ritonavir. *Research Square* 2022.
31. Hasan Ali O, Bomze D, Risch L, et al. Severe COVID-19 is associated with elevated serum IgA and antiphospholipid IgA-antibodies. *Clinical Infectious Diseases* 2020.
32. Levine AC, Fukuta Y, Huaman MA, et al. COVID-19 Convalescent Plasma Outpatient Therapy to Prevent Outpatient Hospitalization: A Meta-analysis of Individual Participant Data From Five Randomized Trials. *Clin Infect Dis* 2023.
33. Focosi D, Quiroga R, McConnell S, Johnson MC, Casadevall A. Convergent Evolution in SARS-CoV-2 Spike Creates a Variant Soup from Which New COVID-19 Waves Emerge. *International Journal of Molecular Sciences* 2023; **24**(3): 2264.
34. Focosi D, Franchini M, Joyner MJ, Casadevall A. Comparative analysis of antibody responses from COVID-19 convalescents receiving various vaccines reveals consistent high neutralizing activity for SARS-CoV-2 variant of concern Omicron. 2021: 2021.12.24.21268317.
35. Gharbharan A, Jordans C, Zwaginga L, et al. Outpatient convalescent plasma therapy for high-risk patients with early COVID-19. A randomized placebo-controlled trial. *Clin Microbiol Infect* 2022.



36. Korley FK, Durkalski-Mauldin V, Yeatts SD, et al. Early Convalescent Plasma for High-Risk Outpatients with Covid-19. *N Engl J Med* 2021; **385**(21): 1951-60.
37. Gupta A, Gonzalez-Rojas Y, Juarez E, et al. Early Treatment for Covid-19 with SARS-CoV-2 Neutralizing Antibody Sotrovimab. *N Engl J Med* 2021.
38. Norton T, Ali S, Sivapalasingam S, et al. REGEN-COV Antibody Combination in Outpatients With COVID-19 – Phase 1/2 Results. *medRxiv* 2022: 2021.06.09.21257915.
39. Montgomery H, Hobbs FDR, Padilla F, et al. Efficacy and safety of intramuscular administration of tixagevimab-cilgavimab for early outpatient treatment of COVID-19 (TACKLE): a phase 3, randomised, double-blind, placebo-controlled trial. *Lancet Respir Med* 2022; **10**(10): 985-96.
40. Butler C, Hobbs FDR, Gbinigie O, et al. Molnupiravir Plus Usual Care Versus Usual Care Alone as Early Treatment for Adults with COVID-19 at Increased Risk of Adverse Outcomes (PANORAMIC): Preliminary Analysis from the United Kingdom Randomised, Controlled Open-Label, Platform Adaptive Trial. *SSRN* 2022; **ssrn.4237902**.
41. Tippabhotla SK, Lahiri S, Rama Raju D, Kandi C, Prasad VN. Efficacy and Safety of Molnupiravir for the Treatment of Non-Hospitalized Adults With Mild COVID-19: A Randomized, Open-Label, Parallel-Group Phase 3 Trial. . *SSRN* 2022; **4042673**.
42. Reis G, Moreira Silva EAS, Medeiros Silva DC, et al. Early Treatment with Pegylated Interferon Lambda for Covid-19. *N Engl J Med* 2023; **388**(6): 518-28.
43. Feld JJ, Kandel C, Biondi MJ, et al. Peginterferon lambda for the treatment of outpatients with COVID-19: a phase 2, placebo-controlled randomised trial. *Lancet Respir Med* 2021; **9**(5): 498-510.
44. Jagannathan P, Andrews JR, Bonilla H, et al. Peginterferon Lambda-1a for treatment of outpatients with uncomplicated COVID-19: a randomized placebo-controlled trial. *Nature Communications* 2021; **12**(1): 1967.
45. Roozbeh F, Saeedi M, Alizadeh-Navaei R, et al. Sofosbuvir and daclatasvir for the treatment of COVID-19 outpatients: a double-blind, randomized controlled trial. *Journal of Antimicrobial Chemotherapy* 2020; **76**(3): 753-7.
46. Bosaeed M, Alharbi A, Mahmoud E, et al. Efficacy of favipiravir in adults with mild COVID-19: a randomized, double-blind, multicentre, placebo-controlled clinical trial. *Clin Microbiol Infect* 2022; **28**(4): 602-8.
47. Vaezi A, Salmasi M, Soltaninejad F, Salahi M, Javanmard SH, Amra B. Favipiravir in the Treatment of Outpatient COVID-19: A Multicenter, Randomized, Triple-Blind, Placebo-Controlled Clinical Trial. *Adv Respir Med* 2023; **91**(1): 18-25.
48. Lowe DM, Brown LK, Chowdhury K, et al. Favipiravir, lopinavir-ritonavir, or combination therapy (FLARE): A randomised, double-blind, 2 x 2 factorial placebo-controlled trial of early antiviral therapy in COVID-19. *PLoS Med* 2022; **19**(10): e1004120.
49. Kaizer AM, Shapiro NI, Wild J, et al. Lopinavir/ritonavir for treatment of non-hospitalized patients with COVID-19: a randomized clinical trial. *Int J Infect Dis* 2023; **128**: 223-9.
50. Parienti JJ, Prazuck T, Peyro-Saint-Paul L, et al. Effect of Tenofovir Disoproxil Fumarate and Emtricitabine on nasopharyngeal SARS-CoV-2 viral load burden amongst outpatients with COVID-19: A pilot, randomized, open-label phase 2 trial. *EClinicalMedicine* 2021; **38**: 100993.
51. Reis G, Dos Santos Moreira Silva EA, Medeiros Silva DC, et al. Effect of early treatment with metformin on risk of emergency care and hospitalization among patients with COVID-19: The TOGETHER randomized platform clinical trial. *Lancet Reg Health Am* 2022; **6**: 100142.



52. Lenze EJ, Mattar C, Zorumski CF, et al. Fluvoxamine vs Placebo and Clinical Deterioration in Outpatients With Symptomatic COVID-19: A Randomized Clinical Trial. *JAMA* 2020; **324**(22): 2292-300.
53. McCarthy MW, Naggie S, Boulware DR, et al. Effect of Fluvoxamine vs Placebo on Time to Sustained Recovery in Outpatients With Mild to Moderate COVID-19: A Randomized Clinical Trial. *JAMA* 2023; **329**(4): 296-305.
54. Reis G, Dos Santos Moreira Silva EA, Medeiros Silva DC, et al. Oral Fluvoxamine With Inhaled Budesonide for Treatment of Early-Onset COVID-19 : A Randomized Platform Trial. *Ann Intern Med* 2023; **176**(5): 667-75.
55. Reis G, Silva E, Silva DCM, et al. Effect of Early Treatment with Ivermectin among Patients with Covid-19. *N Engl J Med* 2022; **386**(18): 1721-31.
56. Rezai MS, Ahangarkani F, Hill A, et al. Non-effectiveness of Ivermectin on Inpatients and Outpatients With COVID-19; Results of Two Randomized, Double-Blinded, Placebo-Controlled Clinical Trials. *Front Med (Lausanne)* 2022; **9**: 919708.
57. Naggie S, Boulware DR, Lindsell CJ, et al. Effect of Ivermectin vs Placebo on Time to Sustained Recovery in Outpatients With Mild to Moderate COVID-19: A Randomized Clinical Trial. *JAMA* 2022; **328**(16): 1595-603.
58. Naggie S, Boulware DR, Lindsell CJ, et al. Effect of Higher-Dose Ivermectin for 6 Days vs Placebo on Time to Sustained Recovery in Outpatients With COVID-19: A Randomized Clinical Trial. *JAMA* 2023; **329**(11): 888-97.
59. Skipper CP, Pastick KA, Engen NW, et al. Hydroxychloroquine in Nonhospitalized Adults With Early COVID-19 : A Randomized Trial. *Ann Intern Med* 2020; **173**(8): 623-31.
60. Schwartz I, Boesen ME, Cerchiaro G, et al. Assessing the efficacy and safety of hydroxychloroquine as outpatient treatment of COVID-19: a randomized controlled trial. *CMAJ Open* 2021; **9**(2): E693-E702.
61. Mitja O, Reis G, Boulware DR, et al. Hydroxychloroquine for treatment of non-hospitalized adults with COVID-19: A meta-analysis of individual participant data of randomized trials. *Clin Transl Sci* 2023; **16**(3): 524-35.
62. Johnston C, Brown ER, Stewart J, et al. Hydroxychloroquine with or without azithromycin for treatment of early SARS-CoV-2 infection among high-risk outpatient adults: A randomized clinical trial. *EClinicalMedicine* 2021; **33**: 100773.
63. Spivak AM, Barney BJ, Greene T, et al. A Randomized Clinical Trial Testing Hydroxychloroquine for Reduction of SARS-CoV-2 Viral Shedding and Hospitalization in Early Outpatient COVID-19 Infection. *Microbiol Spectr* 2023; **11**(2): e0467422.
64. Rodrigues C, Freitas-Santos RS, Levi JE, et al. Hydroxychloroquine plus azithromycin early treatment of mild COVID-19 in an outpatient setting: a randomized, double-blinded, placebo-controlled clinical trial evaluating viral clearance. *Int J Antimicrob Agents* 2021; **58**(5): 106428.
65. Puskarich MA, Cummins NW, Ingraham NE, et al. A multi-center phase II randomized clinical trial of losartan on symptomatic outpatients with COVID-19. *EClinicalMedicine* 2021; **37**: 100957.
66. Cairns DM, Dulko D, Griffiths JK, et al. Efficacy of Niclosamide vs Placebo in SARS-CoV-2 Respiratory Viral Clearance, Viral Shedding, and Duration of Symptoms Among Patients With Mild to Moderate COVID-19: A Phase 2 Randomized Clinical Trial. *JAMA Network Open* 2022; **5**(2): e2144942-e.

67. Connors JM, Brooks MM, Sciruba FC, et al. Effect of Antithrombotic Therapy on Clinical Outcomes in Outpatients With Clinically Stable Symptomatic COVID-19: The ACTIV-4B Randomized Clinical Trial. *JAMA* 2021; **326**(17): 1703-12.
68. Gonzalez-Ochoa AJ, Raffetto JD, Hernandez AG, et al. Sulodexide in the Treatment of Patients with Early Stages of COVID-19: A Randomized Controlled Trial. *Thromb Haemost* 2021; **121**(7): 944-54.
69. Cools F, Virdone S, Sawhney J, et al. Thromboprophylactic low-molecular-weight heparin versus standard of care in unvaccinated, at-risk outpatients with COVID-19 (ETHIC): an open-label, multicentre, randomised, controlled, phase 3b trial. *Lancet Haematol* 2022; **9**(8): e594-e604.
70. Barco S, Voci D, Held U, et al. Enoxaparin for primary thromboprophylaxis in symptomatic outpatients with COVID-19 (OVID): a randomised, open-label, parallel-group, multicentre, phase 3 trial. *Lancet Haematol* 2022; **9**(8): e585-e93.
71. Clemency BM, Varughese R, Gonzalez-Rojas Y, et al. Efficacy of Inhaled Ciclesonide for Outpatient Treatment of Adolescents and Adults With Symptomatic COVID-19: A Randomized Clinical Trial. *JAMA Intern Med* 2022; **182**(1): 42-9.
72. Duvignaud A, Lhomme E, Onaisi R, et al. Inhaled ciclesonide for outpatient treatment of COVID-19 in adults at risk of adverse outcomes: a randomised controlled trial (COVERAGE). *Clin Microbiol Infect* 2022; **28**(7): 1010-6.
73. Thomas S, Patel D, Bittel B, et al. Effect of High-Dose Zinc and Ascorbic Acid Supplementation vs Usual Care on Symptom Length and Reduction Among Ambulatory Patients With SARS-CoV-2 Infection: The COVID A to Z Randomized Clinical Trial. *JAMA Netw Open* 2021; **4**(2): e210369.
74. Adler UC, Adler MS, Padula AEM, et al. Homeopathy for COVID-19 in primary care: A randomized, double-blind, placebo-controlled trial (COVID-Simile study). *J Integr Med* 2022; **20**(3): 221-9.
75. Khorshiddoust RR, Khorshiddoust SR, Hosseinabadi T, et al. Efficacy of a multiple-indication antiviral herbal drug (Saliravira(R)) for COVID-19 outpatients: A pre-clinical and randomized clinical trial study. *Biomed Pharmacother* 2022; **149**: 112729.
76. Hinks TSC, Cureton L, Knight R, et al. Azithromycin versus standard care in patients with mild-to-moderate COVID-19 (ATOMIC2): an open-label, randomised trial. *Lancet Respir Med* 2021; **9**(10): 1130-40.
77. McCreary MR, Schnell PM, Rhoda DA. Randomized double-blind placebo-controlled proof-of-concept trial of resveratrol for outpatient treatment of mild coronavirus disease (COVID-19). *Sci Rep* 2022; **12**(1): 10978.

Figure 1  
PRISMA flowchart for randomized controlled trials (RCT) selection in this systematic review.

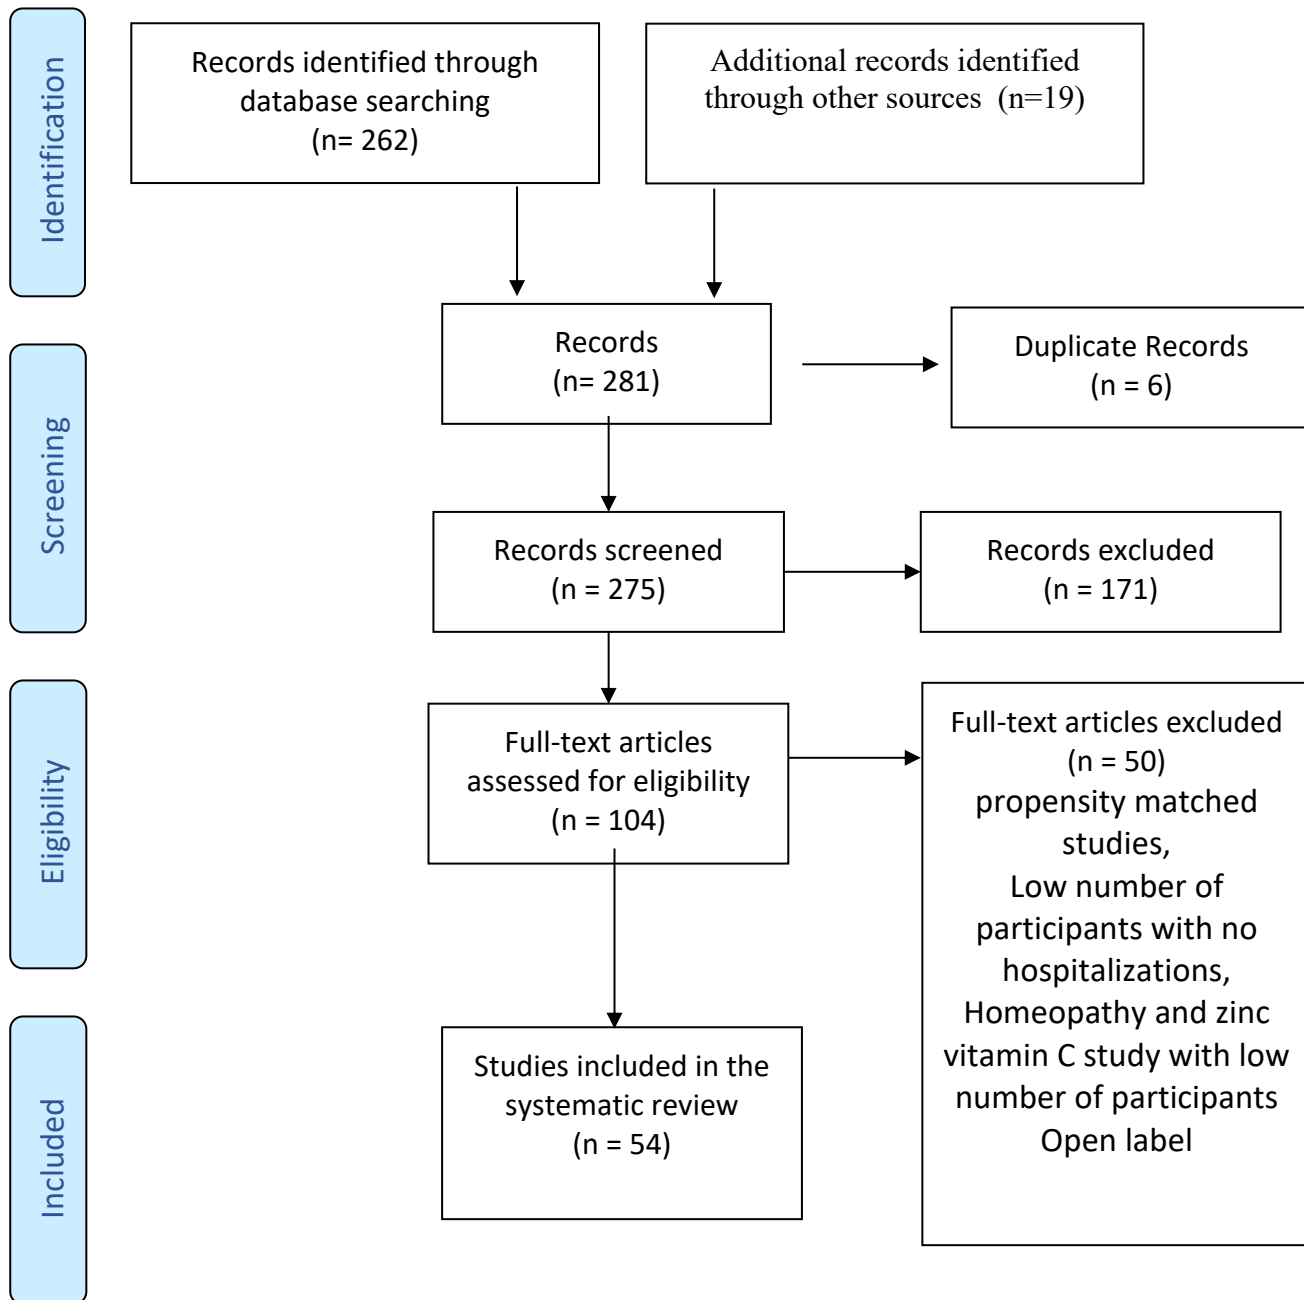



Figure 3

Percent hospitalisations in control groups sorted by therapy type and descending control hospitalisation rates.

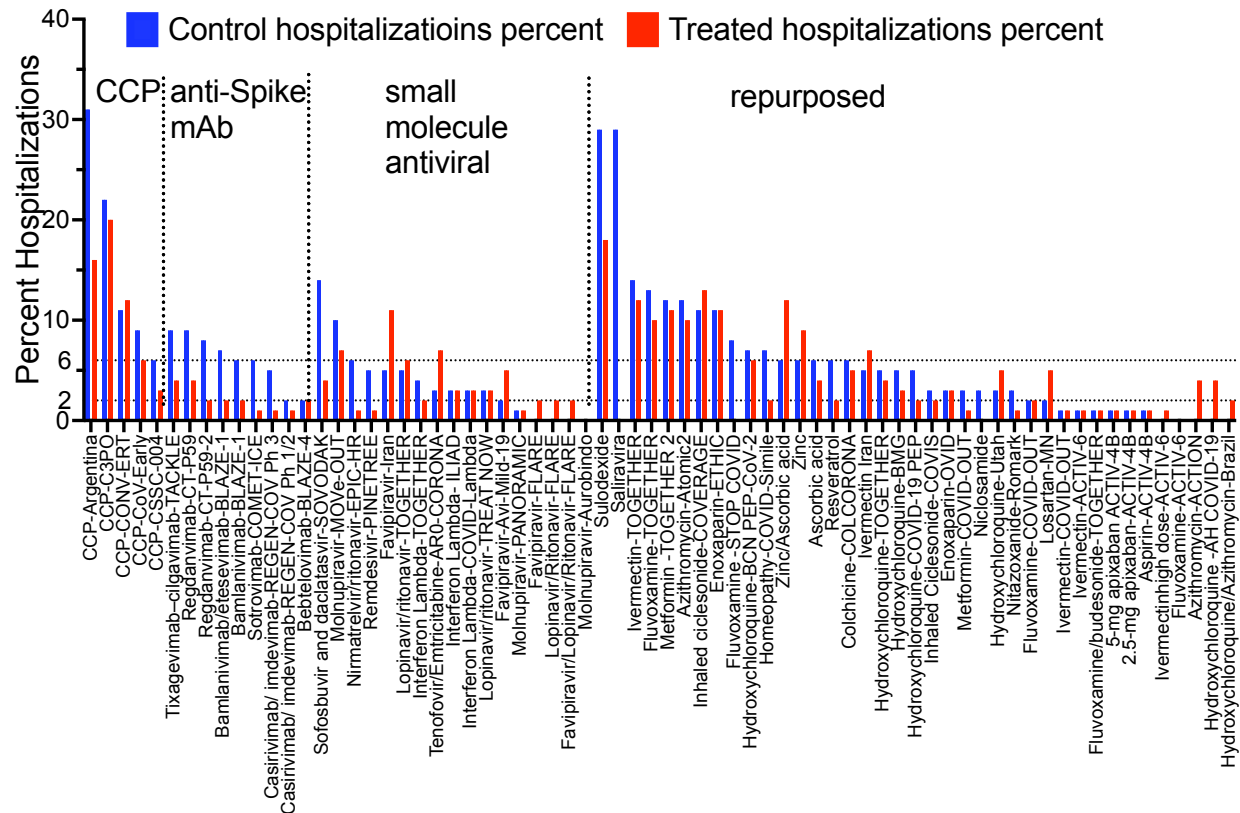



Figure 4

Odds ratio for hospitalisations with diverse therapeutic interventions, grouped according to mechanism of action (CCP, mAbs, small molecule antivirals and repurposed drugs).

CCP- Fixed and random effect model

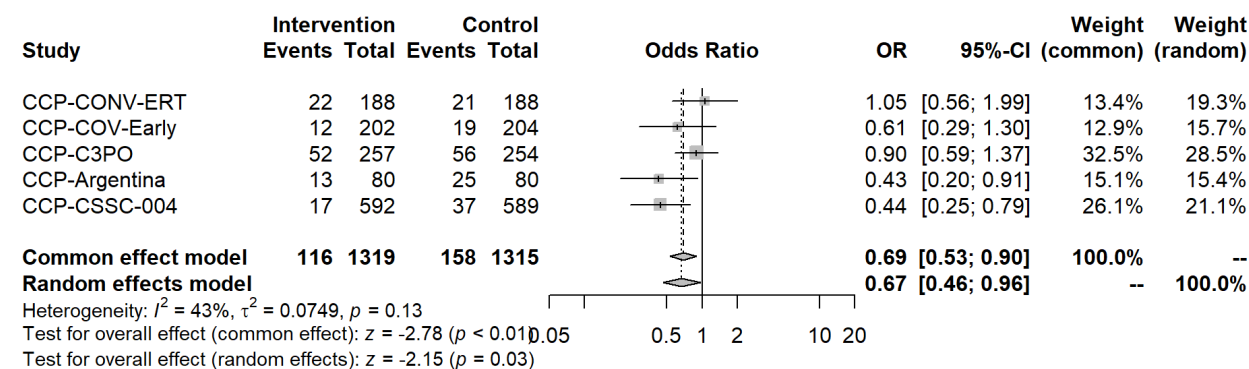

mAbs- Fixed and random effect model

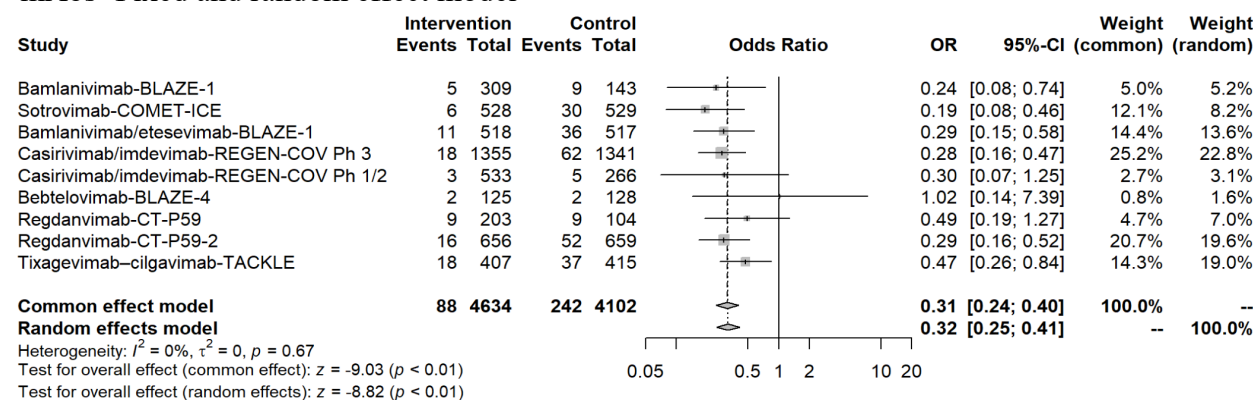

Small Molecule antivirals- Random effect model

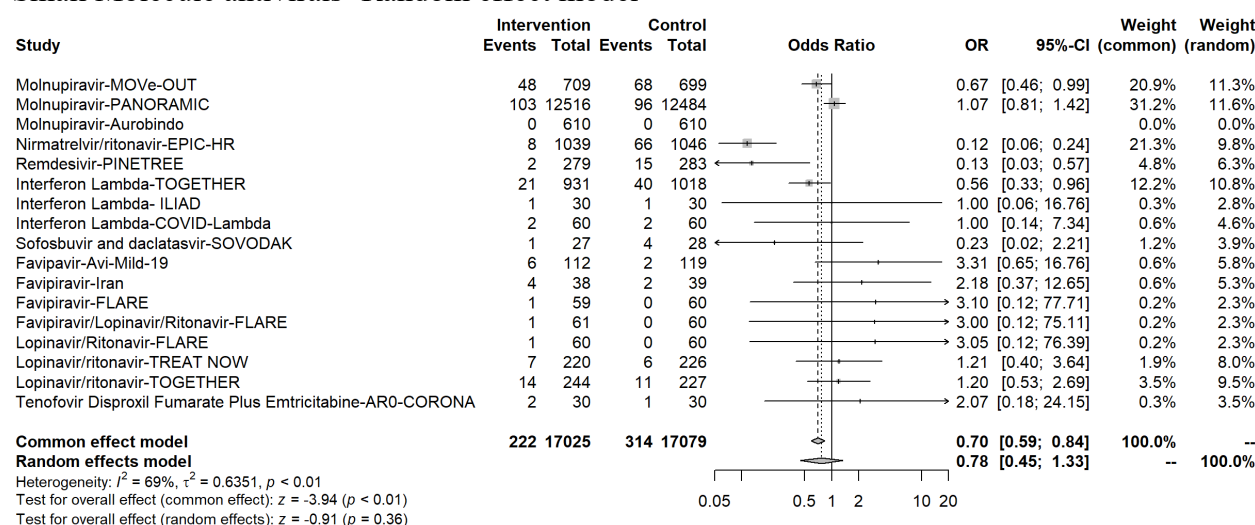

## Repurposed Drugs-Fixed effect model

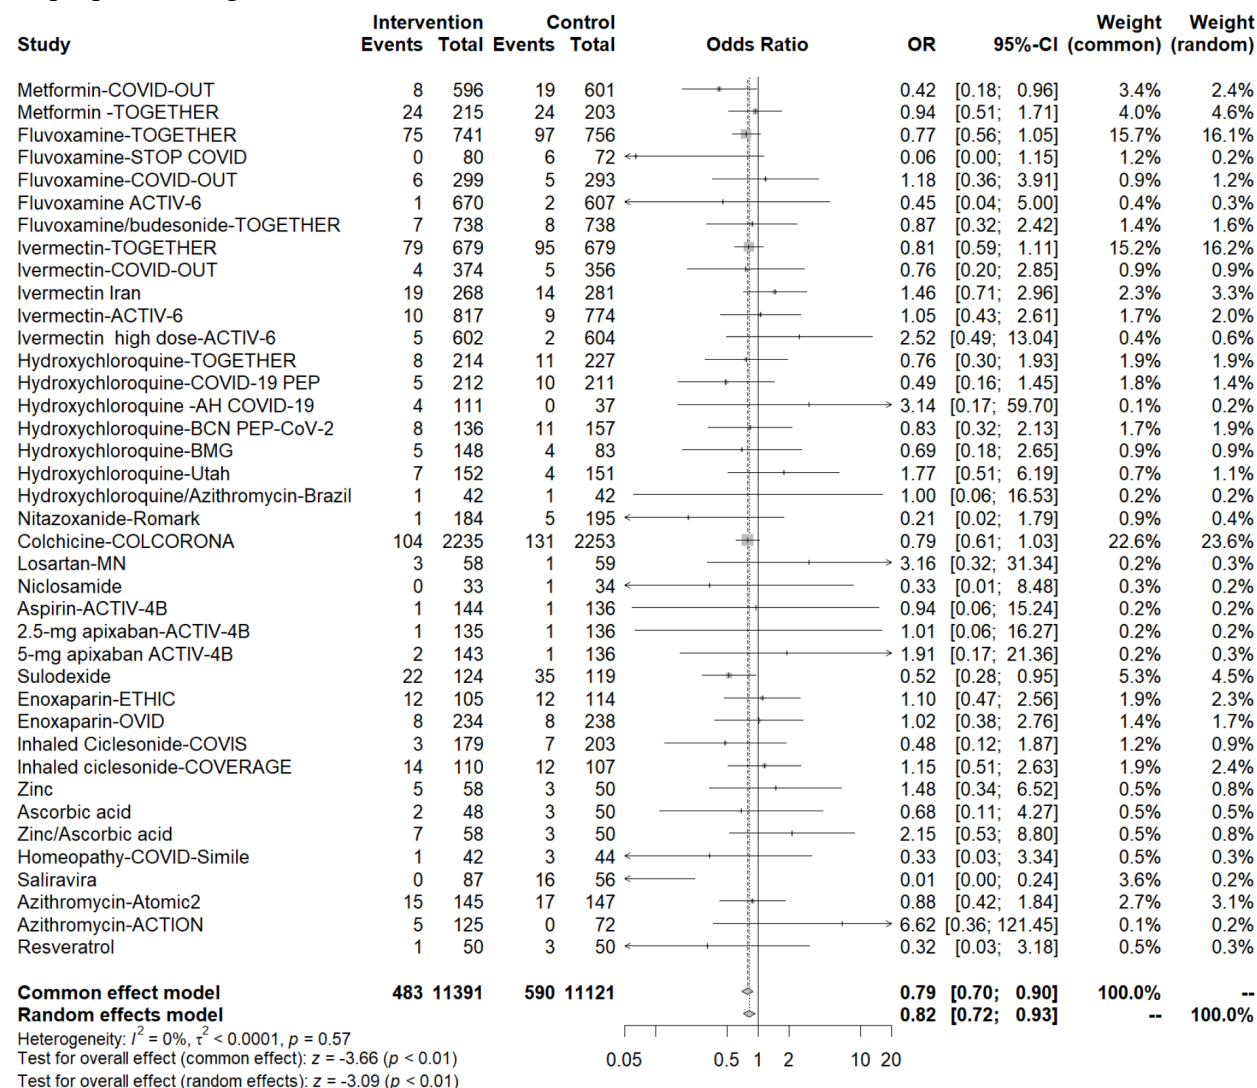

Figure 5

Odds ratio for point estimates for hospitalisation in RCT subgroups treated A) within 5 days since onset of symptoms and also B) over 5 days within same trial.

A) Early treatment-Fixed and random effect model

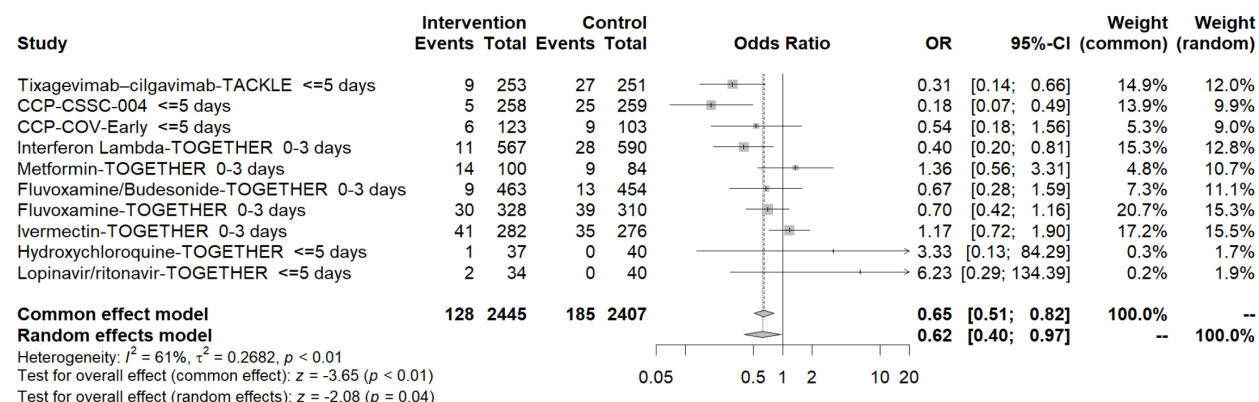

B Late treatment-Fixed and random effect model

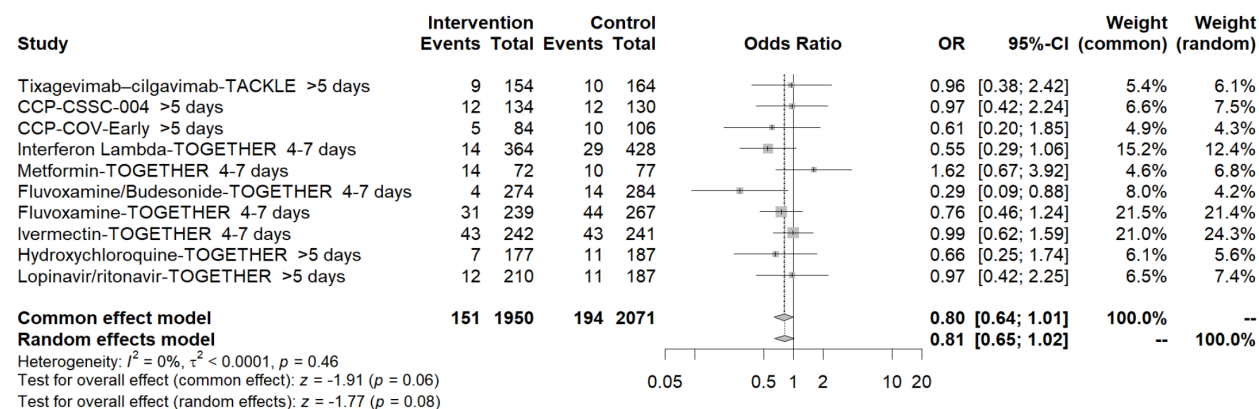

Figure 6

Venn diagram of mAb efficacy against Omicron sublineages. *In vitro* activity of currently approved mAbs against Omicron sublineages circulating as of October 2022. Specific Omicron Spike amino acid mutations causing baseline  $\geq 4$ -fold-reduction in neutralization against mAbs are reported. Mutations for which the majority of studies are concordant are reported: the different fold-reductions for each mAb are identified across concordant studies as color coded numbers defining the mean median values of specific reduction in each study. Sourced from <https://covdb.stanford.edu/page/susceptibility-data> (accessed on January 31, 2023)

\* L452R occurs in all BA.4/BA.5 lineages, but only in several BA.2. sublineages.

! R346X and K444X occur in a growing number of BA.2 and BA.4/5 sublineages as a result of convergent evolution.

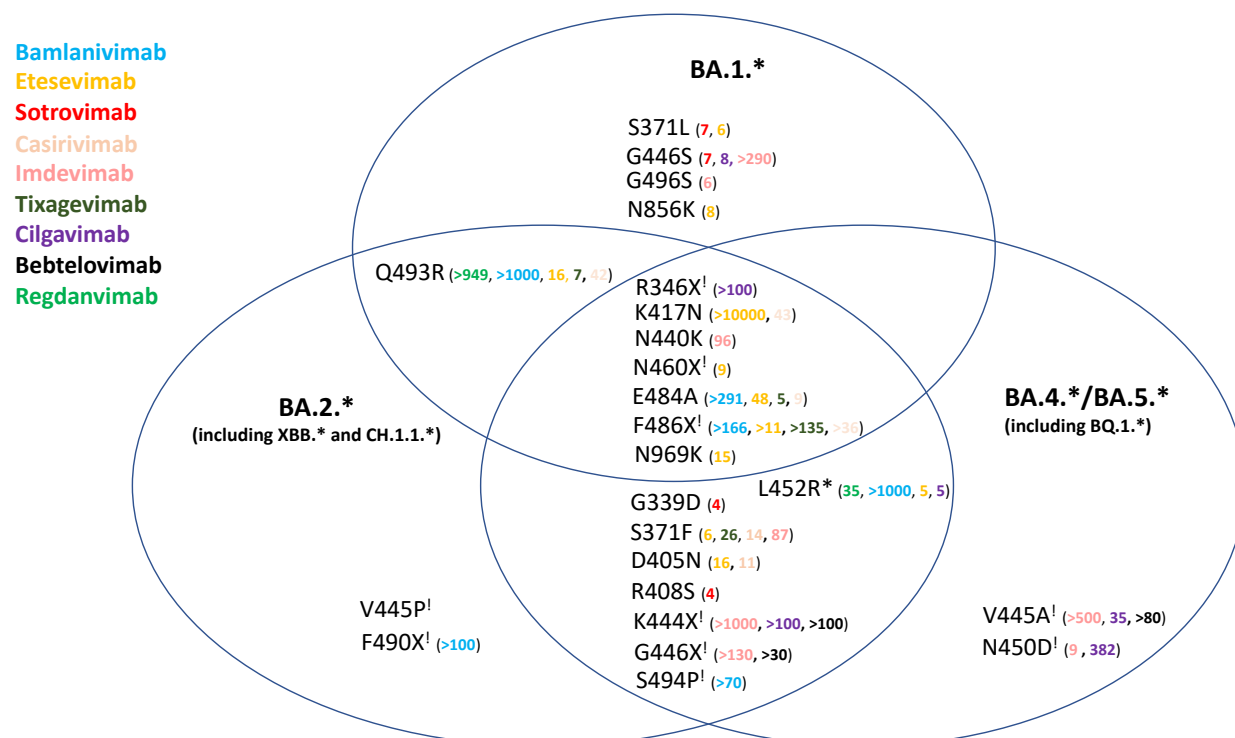

Table 1

Hospital rates, risk reductions, NNT, numbers and symptom resolution

| Study                                                              | Control hospitalizations % | hospitalizations % in intervention arm | ARR percent (95% CI) | RRR percent (95% CI) | NNT to prevent 1 hospitalization | Hospitalization (n) in control arm | total pts in control arm (n) | Hospitalization (n) in intervention arm | Total pts (n) in intervention arm | Symptom resolution: median duration- Intervention to control in days |
|--------------------------------------------------------------------|----------------------------|----------------------------------------|----------------------|----------------------|----------------------------------|------------------------------------|------------------------------|-----------------------------------------|-----------------------------------|----------------------------------------------------------------------|
| CCP (5 RCT) % or totals                                            | 12                         | 8.8                                    | 3.2 (0.9, 5.6)       | 26.8 (8.1, 41.7)     | 31                               | 158                                | 1315                         | 116                                     | 1319                              |                                                                      |
| anti-Spike mAbs (8 RCT) % or totals                                | 5.9                        | 1.9                                    | 4.0 (3.2, 4.8)       | 67.8 (59.1, 74.7)    | 25                               | 242                                | 4102                         | 88                                      | 4634                              |                                                                      |
| Small molecule antiviral (11 RCTs) total or average                | 1.8                        | 1.3                                    | 0.5 (0.3, 0.8)       | 29.1 (15.9, 40.2)    | 187                              | 314                                | 17079                        | 222                                     | 17025                             |                                                                      |
| Small molecule antiviral (10 RCTs - w/o Mol-Pan.) total or average | 4.7                        | 2.6                                    | 2.1 (1.3, 2.9)       | 44.4 (30.7, 55.3)    | 48                               | 218                                | 4595                         | 119                                     | 4509                              |                                                                      |
| Repurposed drugs (20 RCTs) total or average                        | 5.3                        | 4.2                                    | 1.1 (0.5, 1.6)       | 20.1 (10.1, 28.9)    | 94                               | 590                                | 11121                        | 483                                     | 11391                             |                                                                      |
| All (47 RCTs) total or average                                     | 3.9                        | 2.6                                    | 1.2 (1.0, 1.5)       | 31.8 (25.9, 37.3)    | 81                               | 1304                               | 33617                        | 909                                     | 34369                             |                                                                      |
| CCP-CONV-ert <sup>24</sup>                                         | 11.2                       | 11.7                                   | -0.5 (-7.0, 5.9)     | -4.8 (-83.9, 40.3)   | -188                             | 21                                 | 188                          | 22                                      | 188                               | NO difference 12 d vs 12 d                                           |
| CCP-COV-Early <sup>35</sup>                                        | 9.3                        | 5.9                                    | 3.4 (-1.8, 8.5)      | 36.2 (-27.9, 68.2)   | 29                               | 19                                 | 204                          | 12                                      | 202                               | NO difference 13 d vs 12 d                                           |
| CCP-C3PO <sup>36</sup>                                             | 22.0                       | 20.2                                   | 1.8 (-5.3, 8.9)      | 8.2 (-28.3, 34.4)    | 55                               | 56                                 | 254                          | 52                                      | 257                               | NO difference                                                        |
| CCP-Argentina <sup>10</sup>                                        | 31.3                       | 16.3                                   | 15.0 (2.0, 28.0)     | 48.0 (5.8, 71.3)     | 7                                | 25                                 | 80                           | 13                                      | 80                                | Not reported                                                         |
| CCP-CSSC-004 <sup>9</sup>                                          | 6.3                        | 2.9                                    | 3.4 (1.0, 5.8)       | 54.3 (19.7, 74.0)    | 29                               | 37                                 | 589                          | 17                                      | 592                               | Not reported                                                         |



|                                                      |      |     |                   |                     |       |    |       |     |       |                            |
|------------------------------------------------------|------|-----|-------------------|---------------------|-------|----|-------|-----|-------|----------------------------|
| CCP-Argentina (high titer) <sup>10</sup>             | 31.3 | 8.3 | 22.9 (9.3, 36.5)  | 73.3 (17.4, 91.4)   | 4     | 25 | 80    | 3   | 36    | Not reported               |
| CCP-CSSC-004 (<= 5 days) <sup>9</sup>                | 9.7  | 1.9 | 7.7 (3.7, 11.7)   | 79.9 (48.4, 92.2)   | 13    | 25 | 259   | 5   | 257   | Not reported               |
| Bamlanivimab-BLAZE-1 <sup>1</sup>                    | 6.3  | 1.6 | 4.7 (0.5, 8.9)    | 74.3 (24.7, 91.2)   | 21    | 9  | 143   | 5   | 309   | NO difference 11 d to 11 d |
| Sotrovimab-COMET-ICE <sup>37</sup>                   | 5.7  | 1.1 | 4.5 (2.4, 6.7)    | 80.0 (52.3, 91.6)   | 22    | 30 | 529   | 6   | 528   | Not reported               |
| Bamlanivimab/etesevimab-BLAZE-1 <sup>25</sup>        | 7.0  | 2.1 | 4.8 (2.3, 7.4)    | 69.5 (40.8, 84.3)   | 21    | 36 | 517   | 11  | 518   | YES- 8d vs 9d p=0.007      |
| Casirivimab/imdevimab-REGEN-COV Ph 3 <sup>2</sup>    | 4.6  | 1.3 | 3.3 (2.0, 4.6)    | 71.3 (51.7, 82.9)   | 30    | 62 | 1341  | 18  | 1355  | YES- 10 d vs 14 p=0.0001   |
| Casirivimab/imdevimab-REGEN-COV Ph 1/2 <sup>38</sup> | 1.9  | 0.6 | 1.3 (-0.4, 3.1)   | 70.1 (-24.4, 92.8)  | 76    | 5  | 266   | 3   | 533   | Not reported               |
| Bebtelovimab-BLAZE-4 <sup>17</sup>                   | 1.6  | 1.6 | -0.04 (-3.1, 3.0) | -2.4 (-615.7, 85.4) | -2667 | 2  | 128   | 2   | 125   | YES- 6d to 8d p=0.003      |
| Regdanvimab-CT-P59 <sup>26</sup>                     | 8.7  | 4.4 | 4.2 (-1.9, 10.3)  | 48.8 (-25.2, 79.0)  | 23    | 9  | 104   | 9   | 203   | YES 6 d vs 9 d p=0.01      |
| Regdanvimab-CT-P59-2 <sup>27</sup>                   | 7.9  | 2.4 | 5.4 (3.1, 7.8)    | 69.1 (46.4, 82.2)   | 18    | 52 | 659   | 16  | 656   | 8 d to 13 d                |
| Tixagevimab-cilgavimab-TACKLE <sup>39</sup>          | 8.9  | 4.4 | 4.5 (1.1, 7.9)    | 50.4 (14.3, 71.3)   | 22    | 37 | 415   | 18  | 407   | Not reported               |
| Molnupiravir-MOVE-OUT <sup>6</sup>                   | 9.7  | 6.8 | 3.0 (0.1, 5.8)    | 30.4 (0.8, 51.2)    | 34    | 68 | 699   | 48  | 709   | NO difference              |
| Molnupiravir-PANORAMIC <sup>40</sup>                 | 0.8  | 0.8 | -0.1 (-0.3, 0.2)  | -7.0 (-41.2, 18.9)  | -1853 | 96 | 12484 | 103 | 12516 | YES 9 d vs 15 d            |
| Molnupiravir-Aurobindo <sup>41</sup>                 | 0.0  | 0.0 | NC                | NC                  | 0     | 0  | 610   | 0   | 610   | Yes 10 d vs 14 d p<0.001   |
| Nirmatrelvir/ritonavir-EPIC-HR <sup>5</sup>          | 6.3  | 0.8 | 5.5 (4.0, 7.1)    | 87.8 (74.7, 94.1)   | 18    | 66 | 1046  | 8   | 1039  | Not reported               |

|                                                                                    |      |      |                       |                           |      |    |      |    |     |                                                                                          |
|------------------------------------------------------------------------------------|------|------|-----------------------|---------------------------|------|----|------|----|-----|------------------------------------------------------------------------------------------|
| Remdesivir-<br>PINETREE <sup>15</sup>                                              | 5.3  | 0.7  | 4.6 (1.8,<br>7.4)     | 86.5 (41.4,<br>96.9)      | 22   | 15 | 283  | 2  | 279 | YES- Alleviation of<br>symptoms by day 14<br>(rate ratio, 1.92; 95%<br>CI, 1.26 to 2.94) |
| Interferon Lambda-<br>TOGETHER <sup>42</sup>                                       | 3.9  | 2.3  | 1.7 (0.1,<br>3.2)     | 42.6 (3.4,<br>65.9)       | 60   | 40 | 1018 | 21 | 931 |                                                                                          |
| Interferon Lambda-<br>ILIAD <sup>43</sup>                                          | 3.3  | 3.3  | 0 (-9.1,<br>9.1)      | 0 (-1426,<br>93.4)        |      | 1  | 30   | 1  | 30  | No difference                                                                            |
| Interferon Lambda-<br>COVID-Lambda <sup>44</sup>                                   | 3.3  | 3.3  | 0 (-6.4,<br>6.4)      | 0 (-586.9,<br>85.4)       |      | 2  | 60   | 2  | 60  | NO difference 20 d<br>vs 20 d                                                            |
| Sofosbuvir and<br>daclatasvir-<br>SOVODAK <sup>45</sup>                            | 14.3 | 3.7  | 10.6 (-<br>4.2, 25.4) | 74.1 (-117,<br>96.9)      | 9    | 4  | 28   | 1  | 27  | NO difference in 7 d<br>symptoms                                                         |
| Favipavir-Avi-<br>Mild-19 <sup>46</sup>                                            | 1.7  | 5.4  | -3.7 (-<br>8.4, 1.1)  | -219 (-1447,<br>34.3)     | -27  | 2  | 119  | 6  | 112 | NO difference 7d vs<br>7d                                                                |
| Favipiravir-Iran <sup>47</sup>                                                     | 5.1  | 10.5 | -5.4 (-<br>17.4, 6.6) | -105.3 (-<br>955.6, 60.1) | -19  | 2  | 39   | 4  | 38  |                                                                                          |
| Favipiravir-<br>FLARE <sup>48</sup>                                                | 0.0  | 1.7  | -1.7 (-<br>5.0, 1.6)  | NA                        | -59  | 0  | 60   | 1  | 59  |                                                                                          |
| Favipiravir/Lopinav<br>ir/Ritonavir-<br>FLARE <sup>48</sup>                        | 0.0  | 1.6  | -1.6 (-<br>4.8, 1.5)  | NA                        | -61  | 0  | 60   | 1  | 61  |                                                                                          |
| Lopinavir/Ritonavir<br>-FLARE <sup>48</sup>                                        | 0.0  | 1.7  | -1.7 (-<br>5.0, 1.6)  | NA                        | -60  | 0  | 60   | 1  | 60  |                                                                                          |
| Lopinavir/ritonavir-<br>TREAT NOW <sup>49</sup>                                    | 2.7  | 3.2  | -0.5 (-<br>3.7, 2.6)  | -19.8 (-251,<br>59.1)     | -190 | 6  | 226  | 7  | 220 | 6 d to 6 d                                                                               |
| Lopinavir/ritonavir-<br>TOGETHER <sup>18</sup>                                     | 4.8  | 5.7  | -0.9 (-<br>4.9, 3.1)  | -18.4 (-155.4,<br>45.1)   | -112 | 11 | 227  | 14 | 244 | NO difference by<br>Cox proportional HR                                                  |
| Tenofovir Disproxil<br>Fumarate Plus<br>Emtricitabine-AR0-<br>CORONA <sup>50</sup> | 3.3  | 6.7  | -3.3 (-<br>14.3, 7.7) | -100 (-<br>1989.8, 80.9)  | -30  | 1  | 30   | 2  | 30  |                                                                                          |
| Metformin-COVID-<br>OUT <sup>16</sup>                                              | 3.2  | 1.3  | 1.8 (0.1,<br>3.5)     | 57.5 (3.8,<br>81.3)       | 55   | 19 | 601  | 8  | 596 | NO difference                                                                            |

|                                               |      |      |                   |                      |       |    |     |    |     |                                                        |
|-----------------------------------------------|------|------|-------------------|----------------------|-------|----|-----|----|-----|--------------------------------------------------------|
| Metformin - TOGETHER <sup>51</sup>            | 11.8 | 11.2 | 0.7 (-5.5, 6.8)   | 5.6 (-60.8, 44.6)    | 152   | 24 | 203 | 24 | 215 | not reported                                           |
| Fluvoxamine-TOGETHER <sup>21</sup>            | 12.8 | 10.1 | 2.7 (-0.5, 5.9)   | 21.1 (-4.8, 40.6)    | 37    | 97 | 756 | 75 | 741 | NO difference- 40% resolved by day 14                  |
| Fluvoxamine-STOP COVID <sup>52</sup>          | 8.3  | 0.0  | 8.3 (1.9, 14.7)   | 1 (1, 1)             | 12    | 6  | 72  | 0  | 80  | YES (100% vs 91.7% resolved on day 7) p=0.009          |
| Fluvoxamine-COVID-OUT <sup>16</sup>           | 1.7  | 2.0  | -0.3 (-2.5, 1.9)  | -17.6 (-281, 63.7)   | -333  | 5  | 293 | 6  | 299 | No difference (14 symptoms on 4 pt scale over 14 days) |
| Fluvoxamine ACTIV-6 <sup>53</sup>             | 0.3  | 0.1  | 0.18 (-0.4, 0.7)  | 54.7 (-398.3, 95.9)  | 555   | 2  | 607 | 1  | 670 | 12 d to 13 d                                           |
| Fluvoxamine/budesonide-TOGETHER <sup>54</sup> | 1.1  | 0.9  | 0.1 (-0.9, 1.1)   | 12.5 (-140.1, 68.1)  | 738   | 8  | 738 | 7  | 738 | not reported                                           |
| Ivermectin-TOGETHER <sup>55</sup>             | 14.0 | 11.6 | 2.4 (-1.2, 5.9)   | 16.8 (-9.9, 37.1)    | 42    | 95 | 679 | 79 | 679 | NO difference- 40% resolved by day 14                  |
| Ivermectin-COVID-OUT <sup>16</sup>            | 1.4  | 1.1  | 0.3 (-1.3, 1.9)   | 23.9 (-181, 79.4)    | 299   | 5  | 356 | 4  | 374 | No difference (14 symptoms on 4 pt scale over 14 days) |
| Ivermectin Iran <sup>56</sup>                 | 5.0  | 7.1  | -2.1 (-6.1, 1.9)  | -42.3 (-178, 27.2)   | -47   | 14 | 281 | 19 | 268 | NO difference                                          |
| Ivermectin-ACTIV-6 <sup>57</sup>              | 1.2  | 1.2  | -0.1 (-1.1, 1.0)  | -5.3 (-158, 57.0)    | -1634 | 9  | 774 | 10 | 817 | No difference (12d vs 13 d)                            |
| Ivermectin high dose-ACTIV-6 <sup>58</sup>    | 0.3  | 0.8  | -0.5 (-1.4, 0.4)  | -150.1 (-1188, 51.1) | -200  | 2  | 604 | 5  | 602 | 11 d vs 11 d no difference                             |
| Hydroxychloroquine-TOGETHER <sup>18</sup>     | 4.8  | 3.7  | 1.1 (-2.7, 4.9)   | 22.9 (-88.1, 68.4)   | 90    | 11 | 227 | 8  | 214 | NO difference by Cox proportional HR                   |
| Hydroxychloroquine-COVID-19 PEP <sup>59</sup> | 4.7  | 2.4  | 2.4 (-1.1, 5.9)   | 50.2 (-43.1, 82.7)   | 42    | 10 | 211 | 5  | 212 | NO Difference in symptom severity score over 14 days   |
| Hydroxychloroquine-AH COVID-19 <sup>60</sup>  | 0.0  | 3.6  | -3.6 (-7.1, -0.1) | NA                   | -28   | 0  | 37  | 4  | 111 | NO difference 14 d vs 12 d                             |

|                                                              |      |      |                       |                         |        |     |      |     |      |                                                                                       |
|--------------------------------------------------------------|------|------|-----------------------|-------------------------|--------|-----|------|-----|------|---------------------------------------------------------------------------------------|
| Hydroxychloroquin<br>e-BCN PEP-CoV-<br>2 <sup>61</sup>       | 7.0  | 5.9  | 1.1 (-4.5,<br>6.7)    | 16.0 (-103,<br>65.2)    | 89     | 11  | 157  | 8   | 136  | NO difference 10 d<br>vs 12 d                                                         |
| Hydroxychloroquin<br>e-BMG <sup>62</sup>                     | 4.8  | 3.4  | 1.4 (-4.0,<br>6.9)    | 29.9 (-154,<br>80.6)    | 69     | 4   | 83   | 5   | 148  | NO difference 11 d<br>vs 12 d                                                         |
| Hydroxychloroquin<br>e-Utah <sup>63</sup>                    | 2.6  | 4.6  | -2.0 (-<br>6.2, 2.2)  | -73.8 (-481.6,<br>48.0) | -51    | 4   | 151  | 7   | 152  | 6 d to 6 d                                                                            |
| Hydroxychloroquin<br>e/Azithromycin-<br>Brazil <sup>64</sup> | 2.4  | 2.4  | 0 (-6.5,<br>6.5)      | 0 (-1447,<br>93.5)      | 100    | 1   | 42   | 1   | 42   |                                                                                       |
| Nitazoxanide-<br>Romark <sup>22</sup>                        | 2.6  | 0.5  | 2.0 (-0.4,<br>4.5)    | 78.8 (-79.7,<br>97.5)   | 49     | 5   | 195  | 1   | 184  | Yes mild illness (13<br>d vs 18 d , p=0.01),<br>NO difference for<br>moderate illness |
| Colchicine-<br>COLCORONA <sup>20</sup>                       | 5.8  | 4.7  | 1.2 (-0.1,<br>2.5)    | 20.0 (-2.8,<br>37.7)    | 86     | 131 | 2253 | 104 | 2235 | Not reported                                                                          |
| Losartan-MN <sup>65</sup>                                    | 1.7  | 5.2  | -3.5 (-<br>10.1, 3.1) | -205 (-2749,<br>67.3)   | -29    | 1   | 59   | 3   | 58   |                                                                                       |
| Niclosamide <sup>66</sup>                                    | 2.9  | 0.0  | 2.9 (-2.7,<br>8.6)    | 1 (1, 1)                | 34     | 1   | 34   | 0   | 33   | NO difference 12 d<br>vs 15 d                                                         |
| Aspirin-ACTIV-<br>4B <sup>67</sup>                           | 0.7  | 0.7  | 0.04 (-<br>1.9, 2.0)  | 5.6 (-1395,<br>94)      | 2448   | 1   | 136  | 1   | 144  | Not reported                                                                          |
| 2.5-mg apixaban-<br>ACTIV-4B <sup>67</sup>                   | 0.7  | 0.7  | -0.01 (-<br>2.0, 2.0) | -0.7 (-1494,<br>93.6)   | -18360 | 1   | 136  | 1   | 135  | Not reported                                                                          |
| 5-mg apixaban<br>ACTIV-4B <sup>67</sup>                      | 0.7  | 1.4  | -0.7 (-<br>3.1, 1.7)  | -90.2 (-1974,<br>82.6)  | -151   | 1   | 136  | 2   | 143  | Not reported                                                                          |
| Sulodexide <sup>68</sup>                                     | 29.4 | 17.7 | 11.7 (1.1,<br>22.3)   | 39.7 (3.5,<br>62.3)     | 9      | 35  | 119  | 22  | 124  | Not reported                                                                          |
| Enoxaparin-<br>ETHIC <sup>69</sup>                           | 10.5 | 11.4 | -0.9 (-<br>9.2, 7.4)  | -8.6 (-131,<br>49.0)    | -111   | 12  | 114  | 12  | 105  | Not reported                                                                          |
| Enoxaparin-OVID <sup>70</sup>                                | 3.4  | 3.4  | -0.1 (-<br>3.3, 3.2)  | -1.7 (-166,<br>61.2)    | -1740  | 8   | 238  | 8   | 234  | Not reported                                                                          |
| Inhaled Ciclesonide-<br>COVIS <sup>71</sup>                  | 3.4  | 1.7  | 1.8 (-1.4,<br>4.9)    | 51.4 (-85.2,<br>87.2)   | 56     | 7   | 203  | 3   | 179  | 19 d to 19 d                                                                          |

|                                                |      |      |                   |                      |     |    |     |    |     |                                 |
|------------------------------------------------|------|------|-------------------|----------------------|-----|----|-----|----|-----|---------------------------------|
| Inhaled ciclesonide-<br>COVERAGE <sup>72</sup> | 11.2 | 12.7 | -1.5 (-10.1, 7.1) | -13.5 (-134, 45.0)   | -66 | 12 | 107 | 14 | 110 | NO difference 13 d vs 12 d      |
| Zinc <sup>73</sup>                             | 6.0  | 8.6  | -2.6 (-12.4, 7.2) | -43.7 (-471.4, 63.9) | -38 | 3  | 50  | 5  | 58  | 11 d to 10 d                    |
| Ascorbic acid <sup>73</sup>                    | 6.0  | 4.2  | 1.8 (-6.8, 10.5)  | 30.6 (-297.6, 87.9)  | 55  | 3  | 50  | 2  | 48  | 12 d to 10 d                    |
| Zinc/Ascorbic acid <sup>73</sup>               | 6.0  | 12.1 | -6.1 (-16.7, 4.6) | -101.1 (-637, 45.1)  | -16 | 3  | 50  | 7  | 58  | 10 d to 10 d                    |
| Homeopathy-<br>COVID-Simile <sup>74</sup>      | 6.8  | 2.4  | 4.4 (-4.3, 13.2)  | 65.1 (-222.6, 96.2)  | 23  | 3  | 44  | 1  | 42  |                                 |
| Saliravira <sup>75</sup>                       | 28.6 | 0.0  | 28.6 (16.7, 40.4) | 1 (1, 1)             | 4   | 16 | 56  | 0  | 87  | YES 9d vs 14 d p<0.05           |
| Azithromycin-<br>Atomic <sup>76</sup>          | 11.6 | 10.3 | 1.2 (-5.9, 8.4)   | 10.5 (-72.3, 53.6)   | 82  | 17 | 147 | 15 | 145 | Not reported                    |
| Azithromycin-<br>ACTION <sup>28</sup>          | 0.0  | 4.0  | -4.0 (-7.4, -0.6) | NA                   | -25 | 0  | 72  | 5  | 125 | No difference resolution day 14 |
| Resveratrol <sup>77</sup>                      | 6.0  | 2.0  | 4.0 (-3.6, 11.6)  | 66.7 (-210, 96.4)    | 25  | 3  | 50  | 1  | 50  | Not reported                    |

Table 2

Summary of historical efficacy of different therapeutics against SARS-CoV-2 VOCs. White = drug not available at that time; green = effective; orange = partially effective; red= not effective. Restriction reported refer to initial restrictions by FDA. NNT: number needed to treat.

|                         | approximate<br>cost per<br>patient | average NNT<br>(sourced from<br>Table 2) | cost to prevent a<br>single<br>hospitalisation (€) | efficacy<br>against<br>VOC Alpha | efficacy<br>against<br>VOC<br>Delta | efficacy<br>against<br>VOC BA.1 | efficacy<br>against<br>VOC<br>BA.2 | efficacy<br>against<br>BA.4/5 | efficacy<br>against<br>BQ.1.1 |
|-------------------------|------------------------------------|------------------------------------------|----------------------------------------------------|----------------------------------|-------------------------------------|---------------------------------|------------------------------------|-------------------------------|-------------------------------|
| bamlanivimab+etesevimab | 2000                               | 21                                       | 42,000                                             |                                  | restricted<br>04/2021               |                                 |                                    |                               |                               |
| casirivimab+imdevimab   | 2000                               | 30                                       | 60,000                                             |                                  |                                     | restricted<br>01/2022           |                                    |                               |                               |



|                        |                  |                                     |                                  |  |  |  |                       |  |                     |
|------------------------|------------------|-------------------------------------|----------------------------------|--|--|--|-----------------------|--|---------------------|
| sotrovimab             | 1000             | 22                                  | 22,000                           |  |  |  | restricted<br>03/2022 |  |                     |
| tixagevimab+cilgavimab | 1000             | 22                                  | 22,000                           |  |  |  |                       |  | restricted<br>10/22 |
| regdanvimab            | 300              | 23                                  | 6,900                            |  |  |  |                       |  |                     |
| bebtelovimab           | 2000             | Not<br>calculated<br>(low-risk pts) | Not calculated<br>(low-risk pts) |  |  |  |                       |  |                     |
| nirmatrelvir           | 635 (5 days)     | 18                                  | 11,435                           |  |  |  |                       |  |                     |
| molnupiravir           | 635 (5 days))    | 34                                  | 21,590                           |  |  |  |                       |  |                     |
| remdesivir             | 1600 (3<br>days) | 22 (MOVE-<br>Out)                   | 35,200                           |  |  |  |                       |  |                     |
| CCP                    | 200 (600-ml)     | 31                                  | 6,200                            |  |  |  |                       |  |                     |
| Vax-CCP                |                  |                                     |                                  |  |  |  |                       |  |                     |

## Appendix for

# Outpatient regimens to reduce COVID-19 hospitalizations: a systematic review and meta-analysis of randomized controlled trials.

David J. Sullivan, Daniele Focosi, Daniel F. Hanley, Mario Cruciani, Massimo Franchini, Jiangda Ou, Arturo Casadevall, Nigel Paneth

Johns Hopkins Bloomberg School of Public Health, Department of Molecular Microbiology and Immunology, Baltimore, MD USA (Prof. D J Sullivan M.D., Prof. A Casadevall M.D.PhD.); North-Western Tuscany Blood Bank, Pisa University Hospital, Pisa, Italy (Prof. D Focosi, M.D.); Johns Hopkins University School of Medicine Department of Neurology, Brain Injury Outcomes Division, Baltimore, MD, USA (Prof. D F Hanley M.D., J Ou M.S.); Division of Hematology, Carlo Poma Hospital, Mantua, Italy (Prof. M Cruciani M.D., Prof. M Franchini M.D.); Departments of Epidemiology & Biostatistics and Pediatrics & Human Development, College of Human Medicine, Michigan State University, East Lansing, MI, USA (Prof. N Paneth, M.D., M.P.H)

Corresponding author. E-mail:dsulliv7@jhmi.edu

The PDF file includes:

Description of trial participants 2

## Appendix Figures

Appendix Figure 1: Symptom onset to enrollment 3

Appendix Figure 2: Odds ratio for hospitalizations from all interventions 4

Appendix Figure 3: Odds ratio for hospitalizations within CCP group 5

Appendix Figure 4: Risk of bias by RCT 6

Appendix Figure 5: Funnel plots by RCTs class 7

## Appendix Tables

Appendix Table 1a: Participant characteristics Demographic and clinical characteristics 8

Appendix Table 1b: Participant characteristics Geography, age symptom onset 14

Appendix Table 2: Summary of findings table. GRADE evaluation by RCT 21

Appendix Table 2: Hospitalized Odds Ratio statistics 28

Appendix Table 4: Deaths during RCTs 31

Appendix References 35

## Description of trial participants

The median age of participants was about 50 years. The CCP group had a nonweighted trial average of median age equal to 58 years, while the anti-Spike mAbs, small molecule antivirals and repurposed drug groups younger average of median age was equal to 45 to 48 years. Most RCTs had more women than men, and 84% of all RCT 60,043 participants had Caucasian ethnicity (Table 1, Appendix Table 2).

The individual RCTs differed in the percentage of participants with risk factors for progression to severe COVID-19. Of the 37 RCTs reporting aggregated hospitalization risk factors, ten had 100% of participants with at least one hospitalization risk factor, while 5 had fewer than 50%. The bebtelovimab placebo-controlled RCT explicitly focused exclusively on low-risk individuals<sup>1</sup>. Individual risk factors such as diabetes mellitus occurred in 10 to 20% of participants in most RCTs. Obesity with BMI over 29 averaged near 40% of RCT participants in the 4 therapy groups after excluding the large single 25,000 molnupiravir-PANORAMIC RCT with 15% of participants with BMI's over 30 (Table 1)<sup>25</sup>.

Of 18 RCTs reporting seropositivity rates at baseline, 11 had < 25% screening seropositive (Table 1, Figure 2). The molnupiravir-PANORAMIC RCT was an outlier, with 98% participant seropositives<sup>25</sup>. All but one<sup>2</sup> of the RCTs enrolled within 8 days (median) of symptom onset. In RCTs of anti-Spike mAbs and small molecule antivirals, median time from illness onset to intervention was 3.5 to 4 days (Figure 3, Table 1, Appendix Table 2). CCP and repurposed antiviral drug RCTs enrolled within 4.5 to 5.1 days from symptom onset.

The CCP RCTs were conducted in the USA<sup>3,4</sup>, Argentina<sup>5</sup>, Netherlands<sup>6</sup> and Spain<sup>7</sup> (Appendix Table 2). The anti-Spike mAb RCTs all had a USA component, but were largely centered in the Americas except for the sotrovimab RCT, which took place in Spain<sup>8</sup>. Many of the repurposed drugs and nirmatrelvir/ritonavir RCTs recruited worldwide<sup>9</sup>.

Four of the five CCP RCTs (COV-Early<sup>6</sup>, CONV-ERT<sup>7</sup>, Argentina<sup>5</sup> and C3PO<sup>4</sup>), and all eight anti-Spike mAb RCTs took place in the setting of the D614G variant and the Alpha VOC (Figure 2). By contrast, most of the molnupiravir, nirmatrelvir/ritonavir<sup>9</sup> and interferon lambda RCTs were conducted in the setting of the Delta VOC. The ivermectin<sup>10</sup> and fluvoxamine<sup>11</sup> RCTs ended as the Delta VOC wave began in August 2021. The remdesivir RCT spanned D614G, Alpha and Beta VOC but missed Delta<sup>12</sup>. The CSSC-004 RCT of CCP was the longest RCT reviewed, spanning periods characterized by D614G to Delta VOC infections<sup>3</sup>.

## Appendix Figure 1

Comparison of mean interval from symptom onset to enrollment/intervention as well as per protocol interval inclusion limit for all participants.

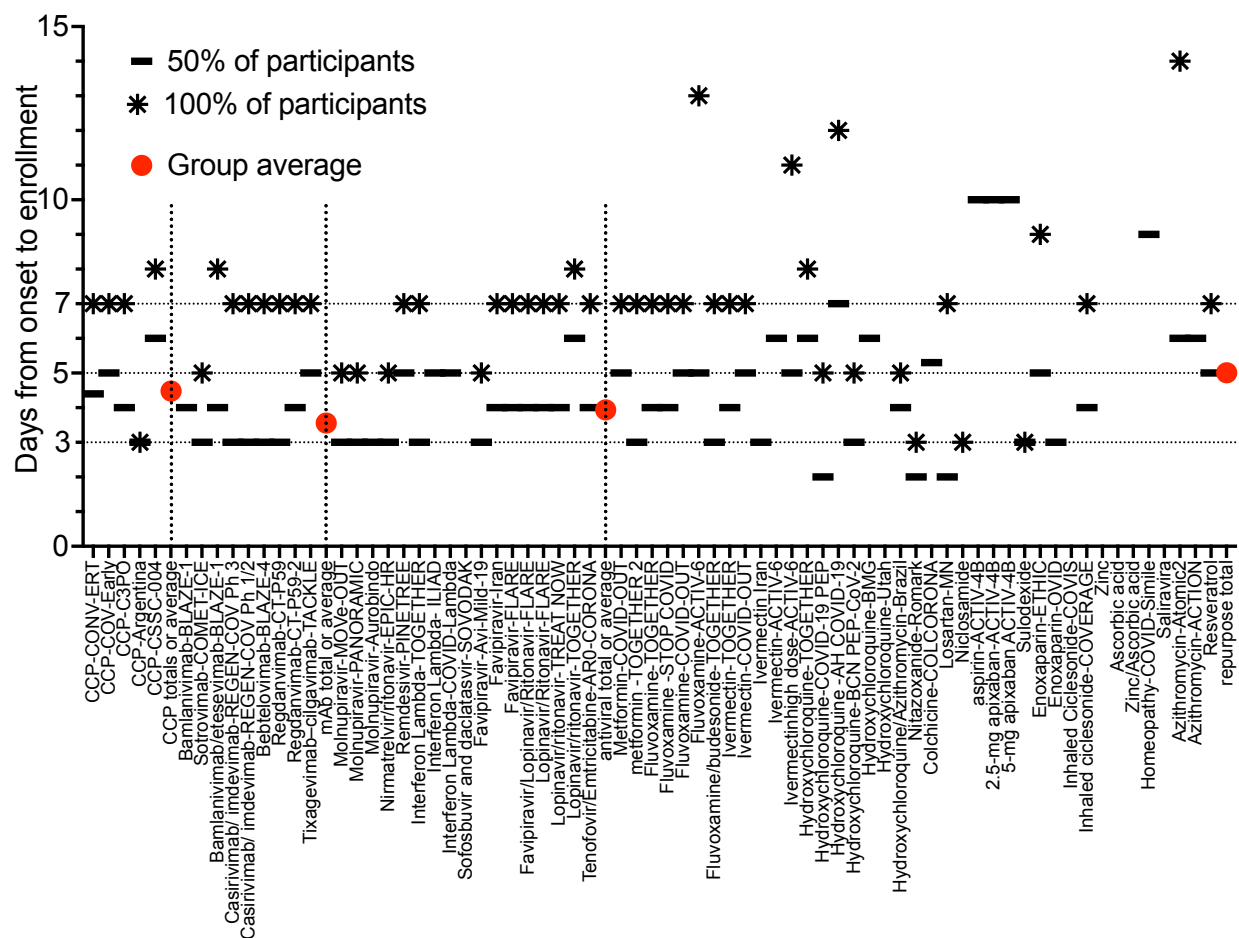

## Appendix Figure 2: Odds ratio for hospitalizations from all interventions.

Therapeutic interventions ordered according to mechanism of action (CCP, anti-Spike mAbs, small molecule antivirals and repurposed drugs

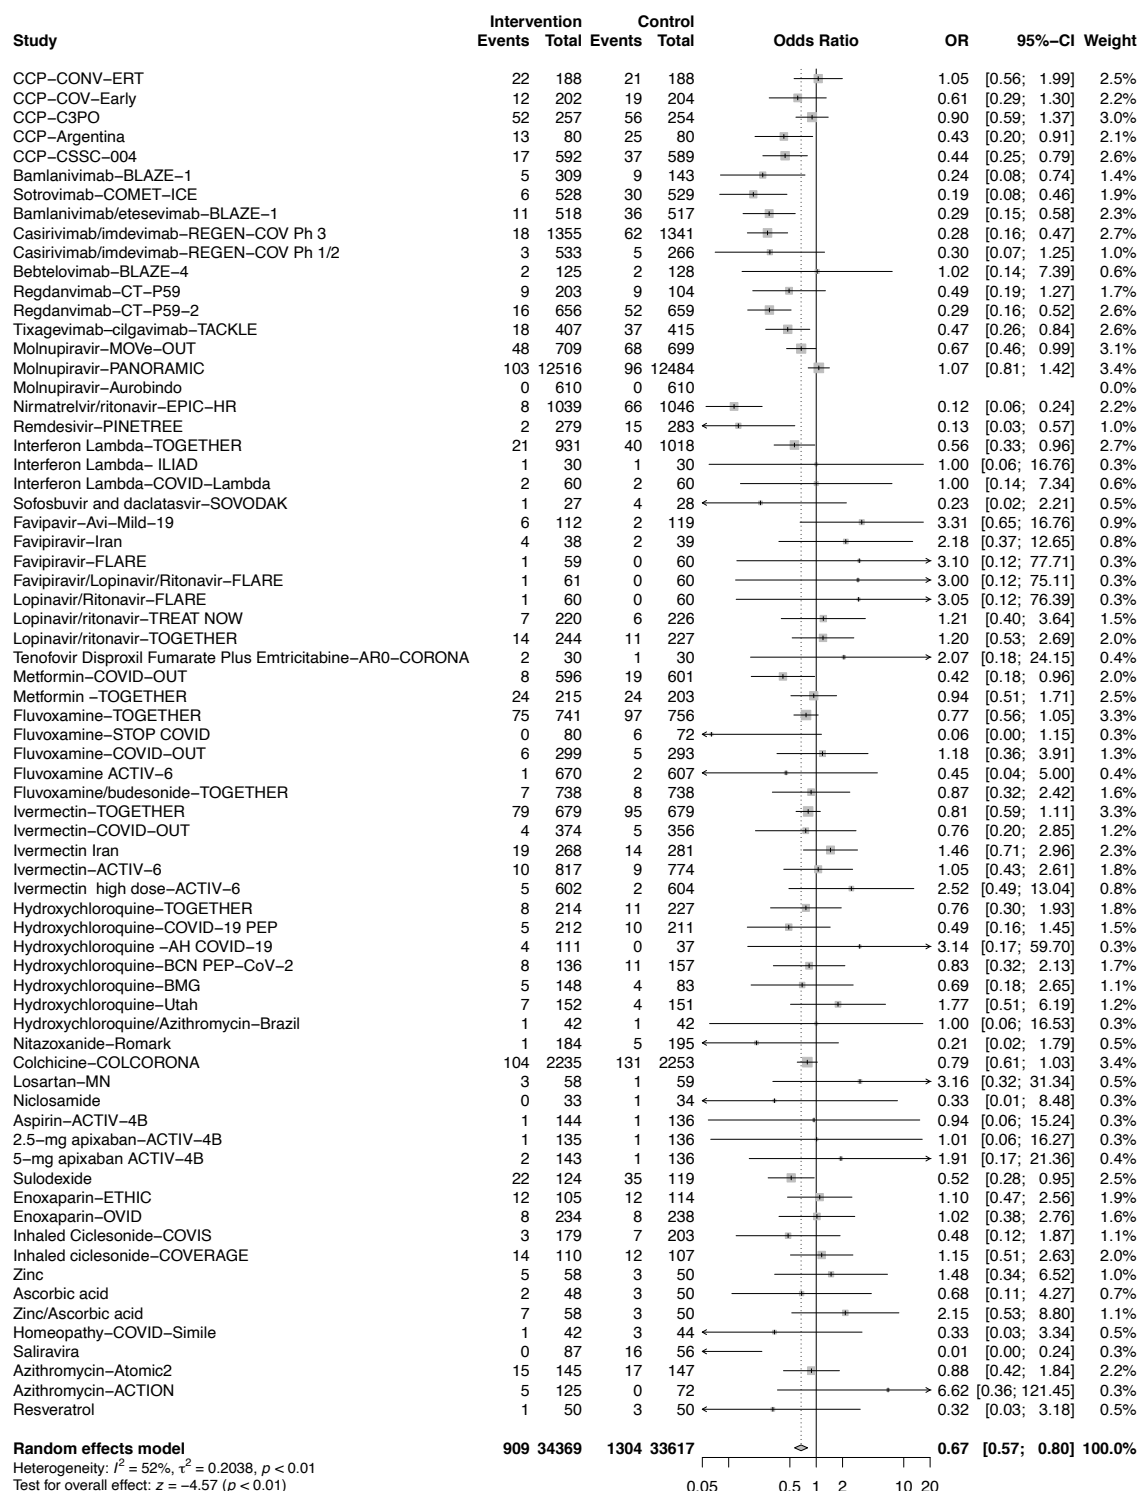

### Appendix Figure 3: Odds ratio for hospitalizations within CCP group

A) All CCP trials excluding CCP-Argentina with a non hospital endpoint of severe respiratory distress or B) All CCP excluding CONV-ERT because of methylene blue inactivation of antibody function. C) all cause hospitalization for CSSC-004 to match all cause hospitalization for other CCP studies

#### A) Fixed and random effect model

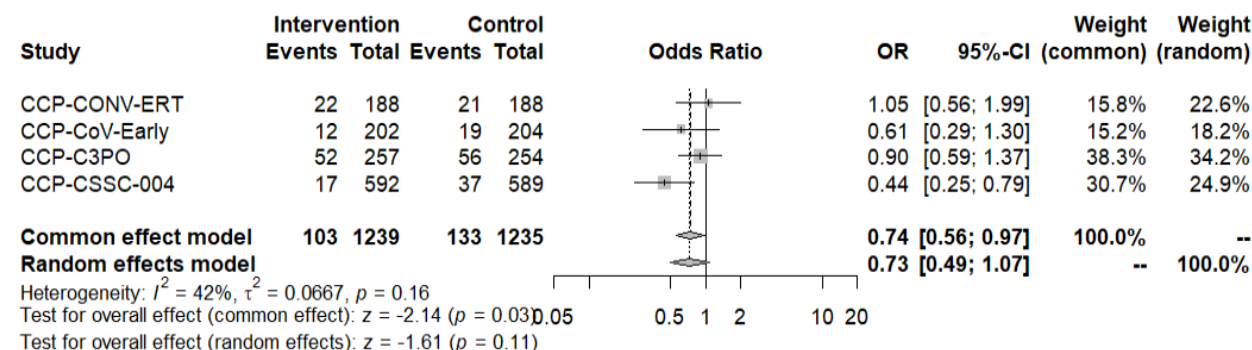

#### B) Fixed and random effect model

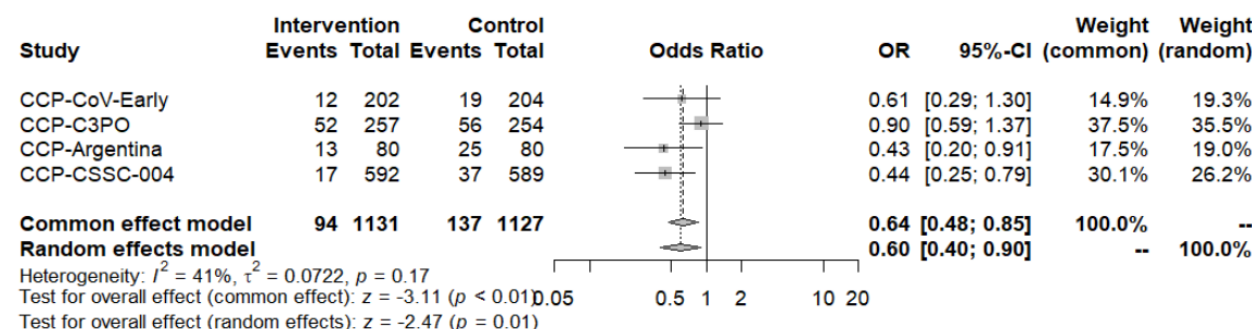

#### C) Fixed and random effect model

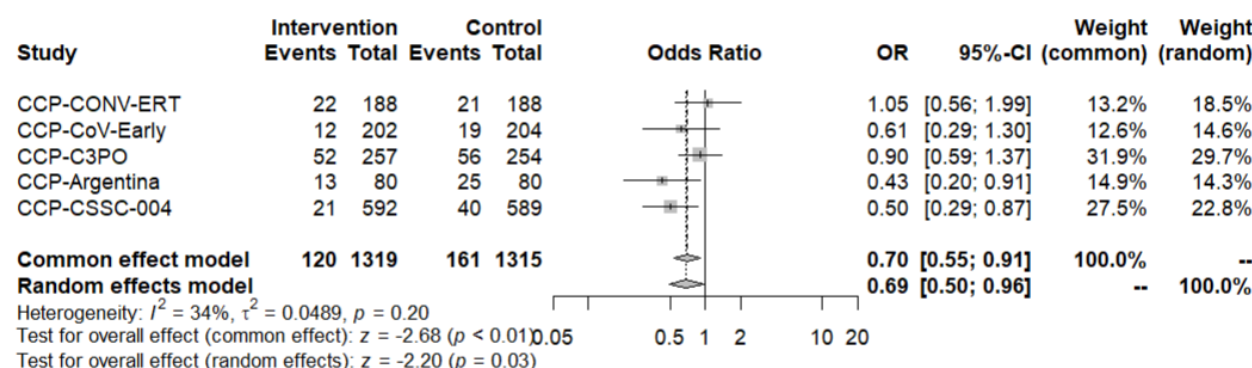

## Appendix Figure 4: Risk of bias by RCT

| TYPE   | Study                                  | Randomization process bias | Deviations from intended intervention bias | Missing outcome data bias | Misclassification of the outcome bias | Selection of the reported results bias | Highest risk of bias     | ROB Source                                                  |
|--------|----------------------------------------|----------------------------|--------------------------------------------|---------------------------|---------------------------------------|----------------------------------------|--------------------------|-------------------------------------------------------------|
| Ab-CCP | CCP-CONV-ert                           | Low                        | Low                                        | Low                       | Low                                   | Low                                    | Low                      | <a href="https://covid-nma.com/">https://covid-nma.com/</a> |
| Ab-CCP | CCP-COV-early                          | Low                        | Low                                        | Low                       | Low                                   | Low                                    | Low                      | pending in NMA-COVID                                        |
| Ab-CCP | CCP-C3PO                               | Low                        | Low                                        | Some concerns             | Low                                   | Low                                    | Some concerns            | <a href="https://covid-nma.com/">https://covid-nma.com/</a> |
| Ab-CCP | CCP-Argentina                          | Low                        | Low                                        | Low                       | Low                                   | Some concerns                          | Some concerns            | <a href="https://covid-nma.com/">https://covid-nma.com/</a> |
| Ab-CCP | CCP-CSSC-004                           | Low                        | Low                                        | Low                       | Low                                   | Low                                    | Low                      | <a href="https://covid-nma.com/">https://covid-nma.com/</a> |
| mAb    | Bamlanivimab-BLAZE-1                   | Low                        | Low                                        | Low                       | Low                                   | Low                                    | Low                      | <a href="https://covid-nma.com/">https://covid-nma.com/</a> |
| mAb    | Sotrovimab-COMET-ICE                   | Low                        | Low                                        | Some concerns             | Low                                   | Some concerns                          | Some concerns            | <a href="https://covid-nma.com/">https://covid-nma.com/</a> |
| mAb    | Bamlanivimab/etesevimab-BLAZE-1        | Low                        | Low                                        | Some concerns             | Low                                   | Low                                    | Some concerns            | <a href="https://covid-nma.com/">https://covid-nma.com/</a> |
| mAb    | Casirivimab/imdevimab-REGEN-COV Ph 3   | Some concerns              | Low                                        | Some concerns             | Low                                   | Some concerns                          | Some concerns            | <a href="https://covid-nma.com/">https://covid-nma.com/</a> |
| mAb    | Casirivimab/imdevimab-REGEN-COV Ph 1/2 | Low                        | Low                                        | Low                       | Low                                   | Low                                    | Low                      | <a href="https://covid-nma.com/">https://covid-nma.com/</a> |
| mAb    | Bebtelovimab-BLAZE-4                   | Low                        | Low                                        | Low                       | Low                                   | Low                                    | Low                      | <a href="https://covid-nma.com/">https://covid-nma.com/</a> |
| mAb    | Regdanvimab-CT-P59                     | Low                        | Low                                        | Some concerns             | Low                                   | Low                                    | Some concerns            | <a href="https://covid-nma.com/">https://covid-nma.com/</a> |
| mAb    | Regdanvimab-CT-P59-2                   | Low                        | Some concerns                              | Low                       | Low                                   | Low                                    | Some concerns            | <a href="https://covid-nma.com/">https://covid-nma.com/</a> |
| mAb    | Tixagevimab-cilgavimab-TACKLE          | Low                        | Some concerns                              | Some concerns             | Low                                   | Low                                    | Some concerns            | <a href="https://covid-nma.com/">https://covid-nma.com/</a> |
| SMA    | Molnupiravir-MOVE-OUT                  | Low                        | Low                                        | Low                       | Low                                   | Low                                    | Low                      | <a href="https://covid-nma.com/">https://covid-nma.com/</a> |
| SMA    | Molnupiravir-PANORAMIC                 | Low                        | Some concerns                              | HIGH                      | Some concerns                         | Low                                    | HIGH                     | <a href="https://covid-nma.com/">https://covid-nma.com/</a> |
| SMA    | Molnupiravir-Aurobindo                 | Low                        | Low                                        | Low                       | Some concerns                         | Some concerns                          | Some concerns            | <a href="https://covid-nma.com/">https://covid-nma.com/</a> |
| SMA    | Nirmatrelvir/ritonavir-EPIC-HR         | Low                        | Low                                        | Some concerns             | Low                                   | Low                                    | Some concerns            | <a href="https://covid-nma.com/">https://covid-nma.com/</a> |
| SMA    | Remdesivir-PINETREE                    | Some concerns              | Low                                        | Low                       | Low                                   | Low                                    | Some concerns            | <a href="https://covid-nma.com/">https://covid-nma.com/</a> |
| SMA    | Interferon Lambda-TOGETHER             | Low                        | Low                                        | Low                       | Low                                   | Low                                    | Low                      | RevMan pending in NMA-COVID                                 |
| SMA    | Interferon Lambda-ILIAID               | Low                        | Low                                        | Low                       | Low                                   | Some concerns                          | Some concerns            | <a href="https://covid-nma.com/">https://covid-nma.com/</a> |
| SMA    | Interferon Lambda-COVID                | Low                        | Low                                        | Low                       | Low                                   | Some concerns                          | Some concerns            | <a href="https://covid-nma.com/">https://covid-nma.com/</a> |
| SMA    | Sofosbuvir & daclatasvir-SOVODAK       | little evidence to score   | little evidence to score                   | little evidence to score  | little evidence to score              | little evidence to score               | little evidence to score | <a href="https://covid-nma.com/">https://covid-nma.com/</a> |
| SMA    | Favipiravir-Avi-Mild-19                | Low                        | Low                                        | Low                       | Some concerns                         | Low                                    | Some concerns            | <a href="https://covid-nma.com/">https://covid-nma.com/</a> |
| SMA    | Favipiravir-Iran                       | Low                        | Low                                        | Low                       | Low                                   | Low                                    | Low                      | RevMan pending in NMA-COVID                                 |
| SMA    | Favipiravir-FLARE                      | Low                        | Low                                        | Some concerns             | Low                                   | Low                                    | Some concerns            | <a href="https://covid-nma.com/">https://covid-nma.com/</a> |
| SMA    | Favipiravir/Lopinavir/Ritonavir-FLARE  | Low                        | Low                                        | Some concerns             | Low                                   | Low                                    | Some concerns            | <a href="https://covid-nma.com/">https://covid-nma.com/</a> |
| SMA    | Lopinavir/Ritonavir-FLARE              | Low                        | Low                                        | Some concerns             | Low                                   | Low                                    | Some concerns            | <a href="https://covid-nma.com/">https://covid-nma.com/</a> |
| SMA    | Lopinavir/ritonavir-TREAT NOW          | Low                        | Low                                        | Some concerns             | Low                                   | Low                                    | Some concerns            | RevMan pending in NMA-COVID                                 |
| SMA    | Lopinavir/ritonavir-TOGETHER           | Low                        | Low                                        | Some concerns             | Low                                   | Some concerns                          | Some concerns            | <a href="https://covid-nma.com/">https://covid-nma.com/</a> |
| SMA    | Tenofovir/Emtricitabine-AR0-CORONA     | Low                        | HIGH                                       | Low                       | Unclear                               | Low                                    | HIGH                     | RevMan pending in NMA-COVID                                 |
| RP     | Metformin-COVID-OUT                    | Low                        | Low                                        | Unclear                   | Low                                   | Low                                    | Low                      | RevMan pending in NMA-COVID                                 |
| RP     | metformin -TOGETHER 2                  | Low                        | Low                                        | Low                       | Low                                   | Low                                    | Low                      | RevMan pending in NMA-COVID                                 |
| RP     | Fluvoxamine-TOGETHER                   | Low                        | Some concerns                              | Low                       | Low                                   | Low                                    | Some concerns            | <a href="https://covid-nma.com/">https://covid-nma.com/</a> |
| RP     | Fluvoxamine -STOP COVID                | Low                        | Low                                        | Some concerns             | Low                                   | Low                                    | Some concerns            | <a href="https://covid-nma.com/">https://covid-nma.com/</a> |
| RP     | Fluvoxamine-COVID-OUT                  | Low                        | Low                                        | Unclear                   | Low                                   | Low                                    | Low                      | RevMan pending in NMA-COVID                                 |
| RP     | Fluvoxamine-ACTIV-6                    | Low                        | Low                                        | Unclear                   | Low                                   | Low                                    | Unclear                  | RevMan pending in NMA-COVID                                 |
| RP     | Fluvoxamine/budesonide-TOGETHER        | Low                        | Low                                        | Unclear                   | Low                                   | Low                                    | Unclear                  | RevMan pending in NMA-COVID                                 |
| RP     | Ivermectin-TOGETHER                    | Low                        | Low                                        | Unclear                   | Low                                   | Low                                    | Low                      | RevMan pending in NMA-COVID                                 |
| RP     | Ivermectin-COVID-OUT                   | Low                        | Low                                        | Unclear                   | Low                                   | Low                                    | Unclear                  | RevMan pending in NMA-COVID                                 |
| RP     | Ivermectin Iran                        | Low                        | Low                                        | Low                       | Unclear                               | Low                                    | Unclear                  | pending in NMA-COVID                                        |
| RP     | Ivermectin-ACTIV-6                     | Low                        | Low                                        | Low                       | Low                                   | Low                                    | Unclear                  | RevMan pending in NMA-COVID                                 |
| RP     | Ivermectin high dose-ACTIV-6           | Low                        | Low                                        | Low                       | Unclear                               | Low                                    | Low                      | RevMan pending in NMA-COVID                                 |
| RP     | Hydroxychloroquine-TOGETHER            | Low                        | Low                                        | Some concerns             | Low                                   | Some concerns                          | Some concerns            | <a href="https://covid-nma.com/">https://covid-nma.com/</a> |
| RP     | Hydroxychloroquine-COVID-19 PEP        | Some concerns              | Low                                        | Some concerns             | Low                                   | Low                                    | Some concerns            | <a href="https://covid-nma.com/">https://covid-nma.com/</a> |
| RP     | Hydroxychloroquine -AH COVID-19        | Low                        | Low                                        | Low                       | Low                                   | Some concerns                          | Some concerns            | <a href="https://covid-nma.com/">https://covid-nma.com/</a> |
| RP     | Hydroxychloroquine-BCN PEP-CoV-2       | Low                        | Low                                        | Some concerns             | Some concerns                         | Some concerns                          | Some concerns            | <a href="https://covid-nma.com/">https://covid-nma.com/</a> |
| RP     | Hydroxychloroquine-BMG                 | Low                        | Low                                        | Some concerns             | Low                                   | Some concerns                          | Some concerns            | <a href="https://covid-nma.com/">https://covid-nma.com/</a> |
| RP     | Hydroxychloroquine-Utah                | Some concerns              | Low                                        | High                      | Low                                   | Some concerns                          | High                     | RevMan pending in NMA-COVID                                 |
| RP     | Hydroxychloroquine/Azithromycin-Brazil | Low                        | Low                                        | Some concerns             | Low                                   | Low                                    | Some concerns            | <a href="https://covid-nma.com/">https://covid-nma.com/</a> |
| RP     | Nitazoxanide-Romark                    | Low                        | Low                                        | Some concerns             | Low                                   | Some concerns                          | Some concerns            | <a href="https://covid-nma.com/">https://covid-nma.com/</a> |
| RP     | Colchicine-COLCORONA                   | Low                        | Low                                        | Low                       | Low                                   | Some concerns                          | Some concerns            | <a href="https://covid-nma.com/">https://covid-nma.com/</a> |
| RP     | Losartan-MN                            | Low                        | Low                                        | Low                       | Low                                   | Low                                    | Low                      | <a href="https://covid-nma.com/">https://covid-nma.com/</a> |
| RP     | Niclosamide                            | Some concerns              | Low                                        | Some concerns             | Low                                   | Low                                    | Some concerns            | <a href="https://covid-nma.com/">https://covid-nma.com/</a> |
| RP     | Aspirin-ACTIV-4B                       | Low                        | Some concerns                              | Some concerns             | Low                                   | Low                                    | Some concerns            | <a href="https://covid-nma.com/">https://covid-nma.com/</a> |
| RP     | 2.5-mg apixaban-ACTIV-4B               | Low                        | Some concerns                              | Some concerns             | Low                                   | Low                                    | Some concerns            | <a href="https://covid-nma.com/">https://covid-nma.com/</a> |
| RP     | 5-mg apixaban-ACTIV-4B                 | Low                        | Some concerns                              | Some concerns             | Low                                   | Low                                    | Some concerns            | <a href="https://covid-nma.com/">https://covid-nma.com/</a> |
| RP     | Sulodexide                             | Some concerns              | Low                                        | Some concerns             | Low                                   | Some concerns                          | Some concerns            | <a href="https://covid-nma.com/">https://covid-nma.com/</a> |
| RP     | Enoxaparin-ETHIC                       | Low                        | HIGH                                       | Low                       | Low                                   | Low                                    | HIGH                     | pending in NMA-COVID                                        |
| RP     | Enoxaparin-OVID                        | Low                        | HIGH                                       | Low                       | HIGH                                  | Low                                    | HIGH                     | pending in NMA-COVID                                        |
| RP     | Inhaled Ciclesonide-COVIS              | Low                        | Low                                        | Some concerns             | Low                                   | Low                                    | Some concerns            | <a href="https://covid-nma.com/">https://covid-nma.com/</a> |
| RP     | Inhaled ciclesonide-COVERAGE           | Low                        | Low                                        | Low                       | Low                                   | Low                                    | Low                      | <a href="https://covid-nma.com/">https://covid-nma.com/</a> |
| RP     | Zinc                                   | Low                        | Low                                        | Some concerns             | Low                                   | Some concerns                          | Some concerns            | <a href="https://covid-nma.com/">https://covid-nma.com/</a> |
| RP     | Ascorbic acid                          | Low                        | Low                                        | Some concerns             | Low                                   | Some concerns                          | Some concerns            | <a href="https://covid-nma.com/">https://covid-nma.com/</a> |
| RP     | Zinc/Ascorbic acid                     | Low                        | Low                                        | Some concerns             | Low                                   | Some concerns                          | Some concerns            | <a href="https://covid-nma.com/">https://covid-nma.com/</a> |
| RP     | Homeopathy-COVID-Simile                | Low                        | Low                                        | HIGH                      | Low                                   | Low                                    | HIGH                     | RevMan pending in NMA-COVID                                 |
| RP     | Salivaria                              | Low                        | HIGH                                       | HIGH                      | Low                                   | Low                                    | HIGH                     | pending in NMA-COVID                                        |
| RP     | Azithromycin-Atomic2                   | Low                        | Low                                        | Low                       | Some concerns                         | Some concerns                          | Some concerns            | <a href="https://covid-nma.com/">https://covid-nma.com/</a> |
| RP     | Azithromycin-ACTION                    | Low                        | Low                                        | Some concerns             | Low                                   | Low                                    | Some concerns            | <a href="https://covid-nma.com/">https://covid-nma.com/</a> |
| RP     | Resveratrol                            | Low                        | Low                                        | HIGH                      | Unclear                               | Low                                    | HIGH                     | RevMan pending in NMA-COVID                                 |



# **Appendix Figure 5: Funnel plots by RCTs class**

A) CCP, B) anti-Spike mAbs C) small molecule antivirals and D) repurposed drugs. For anti-Spike mAbs RCTs, there is a suggestion of missing studies on the right side of the plot, where results would be unfavourable to the experimental intervention, for which either very high efficacy of high-dose anti-Spike mAbs or non-reporting bias is a plausible explanation.

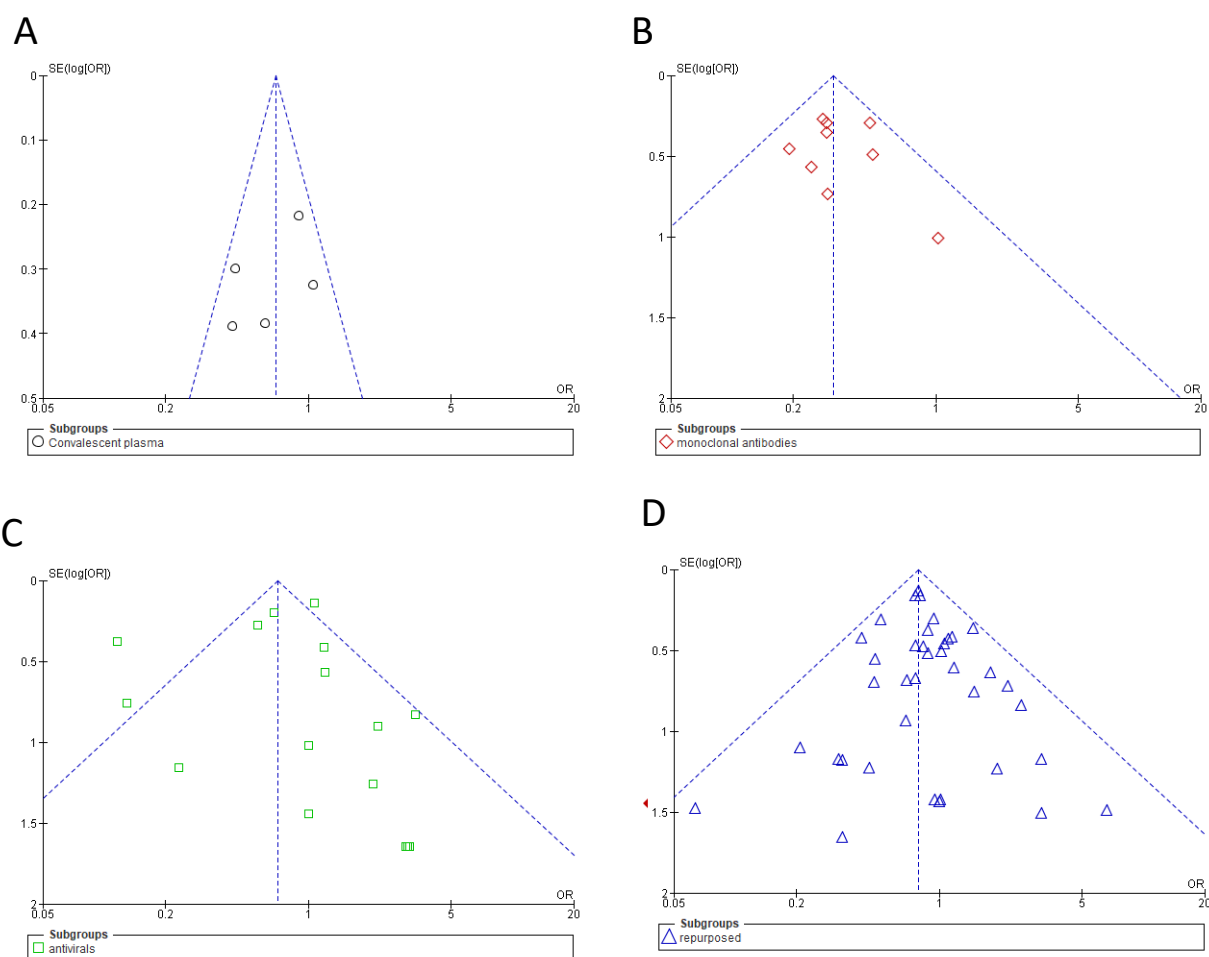

**Table 1a**

Demographic and clinical characteristics of recruits in the RCTs analyzed in this review.

| Study                                                  | mITT  | median age (range) | total female n(%) | White n(%) | Black n(%) | Hispanic n(%) | 1 or more medical high risk conditions for COVID-19 progression | diabetes n(%) | hypertension n(%) | obesity or BMI > 30 n(%) | median duration symptoms | Seropositive at baseline n(%)         | Hospital type         | Endpoint days for hosp |
|--------------------------------------------------------|-------|--------------------|-------------------|------------|------------|---------------|-----------------------------------------------------------------|---------------|-------------------|--------------------------|--------------------------|---------------------------------------|-----------------------|------------------------|
| CCP (5 RCTs) totals or averages                        | 2634  | 58                 | 1409 (53)         | 2213 (84)  | 266 (10)   | 862 (33)      | 2074 (79)                                                       | 326 (15)      | 606 (33)          | 854 (38)                 | 4.5                      | 73 (9)                                |                       |                        |
| anti-Spike mAbs (8 RCTs) totals or averages            | 7421  | 47                 | 3944 (53)         | 6214 (84)  | 455 (6)    | 3113 (42)     | 6562 (88)                                                       | 1067 (14)     | 1249 (17)         | 3197 (43)                | 3.5                      | 1087 (15)                             |                       |                        |
| Small molecule antivirals (11 RCTs) totals or averages | 33148 | 45.4               | 18116 (55)        | 28726 (87) | 399 (1)    | 2458 (7)      | 22400 (68)                                                      | 3150 (10)     | 6954 (21)         | 6271 (19)                | 4                        | 25710 (77) {710/8148=9% w/o-Mol-Pan.) |                       |                        |
| Repurposed drugs (27 RCTs) totals or averages          | 16840 | 48                 | 9595 (57)         | 14752 (89) | 815 (5)    | 4212 (32)     | 8669 (88)                                                       | 2174 (13)     | 4318 (27)         | 6615 (46)                | 5.1                      | 2303 (51)                             |                       |                        |
| CCP-CONV-ert <sup>7</sup>                              | 376   | 56                 | 173 (46)          | 0          | 0          | 376 (100)     | 278 (74)                                                        | 49 (13)       | not reported      | 96 (26)                  | 4.4                      | 43 (11)                               | All cause             | 28-30                  |
| CCP-COV-Early <sup>13</sup>                            | 406   | 58                 | 187 (46)          | 406 (100)  | 0          | 0             | 278 (68)                                                        | not reported  | not reported      | not reported             | 5 (iqr4-6)               | 30 (8)                                | All cause             | 28-30                  |
| CCP-C3PO <sup>4</sup>                                  | 511   | 54                 | 274 (54)          | 237 (46)   | 103 (20)   | 156 (31)      | 511 (100)                                                       | 142 (28)      | 216 (42)          | 302 (59)                 | 4                        | not reported                          | All cause             | 15                     |
| CCP-Argentina <sup>5</sup>                             | 160   | 77 (65-90+)        | 100 (62)          | 0          | 0          | 160 (100)     | 131 (82)                                                        | 36 (23)       | 114 (71)          | 12 (8)                   | 3                        | not reported                          | hypoxia resp rate def | 28-30                  |
| CCP-CSSC-004 <sup>3</sup>                              | 1181  | 43 (18-85)         | 675 (57)          | 934 (79)   | 163 (14)   | 170 (14)      | 470 (40)                                                        | 99 (8)        | 276 (23)          | 444 (38)                 | 6                        | not reported                          | COVID-19 related      | 28-30                  |

|                                                      |       |                      |                   |                   |              |              |                |                    |              |                  |   |                                      |                                          |       |
|------------------------------------------------------|-------|----------------------|-------------------|-------------------|--------------|--------------|----------------|--------------------|--------------|------------------|---|--------------------------------------|------------------------------------------|-------|
| Bamlanivimab-BLAZE-1 <sup>14</sup>                   | 452   | 45<br>(18-86)        | 249<br>(55)       | 389<br>(86)       | 29<br>(6)    | 198<br>(44)  | 310 (69)       |                    | not reported | 201<br>(44)      | 4 | not reported                         | COVI<br>D-19<br>related<br>+ ED<br>visit | 28-30 |
| Sotrovimab-COMET-ICE <sup>8</sup>                    | 1057  | 53(17-96)            | 571<br>(54)       | 919<br>(87)       | 42<br>(4)    | 687<br>(65)  | 1055<br>(99.9) | 233<br>(23)        | not reported | 665<br>(63)      | 3 | not reported                         | All<br>cause                             | 28-30 |
| Bamlanivimab/etesevimab-BLAZE-1 <sup>15</sup>        | 1035  | 54<br>(12-77+)       | 538<br>(52)       | 896<br>(87)       | 83<br>(8)    | 304<br>(29)  | 983 (95)       | 285<br>(28)        | not reported | median<br>34 bmi | 4 | not reported                         | COVI<br>D-19<br>related                  | 28-30 |
| Casirivimab/imdevimab-REGEN-COV Ph 3 <sup>16</sup>   | 2696  | 50<br>(iqr<br>39-50) | 1407<br>(52)      | 2297<br>(85)      | 143<br>(5)   | 935<br>(35)  | 2696<br>(100)  | 412<br>(15)        | 993 (37)     | 1559<br>(58)     | 3 | 620 (23)                             | COVI<br>D-19<br>related                  | 28-30 |
| Casirivimab/imdevimab-REGEN-COV Ph 1/2 <sup>17</sup> | 799   | 42<br>(iqr<br>31-52) | 423<br>(53)       | 681<br>(85)       | 74<br>(9)    | 403<br>(50)  | 483 (61)       |                    |              | 298<br>(37)      | 3 | 304 (38)                             | All<br>cause                             | 28-30 |
| Bebtelovimab-BLAZE-4 <sup>1</sup>                    | 253   | 34                   | 135<br>(53)       | 187<br>(74)       | 48<br>(19)   | 91 (36)      | 0 (0)          | not reported       | not reported |                  | 3 | 27 (11)                              | COVI<br>D-19<br>related                  | 28-30 |
| Regdanvimab-CT-P59 <sup>18</sup>                     | 307   | 51<br>(iqr40-60)     | 166<br>(51)       | 286<br>(87)       | 0            | 27 (8)       | 226 (69)       | 29 (9)             | not reported | 52 (16)          | 3 | 9 (3)                                | All<br>cause                             | 28-30 |
| Regdanvimab-CT-P59-2 <sup>19</sup>                   | 1315  | 48<br>(iqr38-59)     | 641<br>(49)       | 1132<br>(86)      | 7 (1)        | 276<br>(21)  | 880 (67)       | 120<br>(9)         | 443 (34)     | 415<br>(32)      | 4 | 148 (11)                             | all<br>cause                             | 28    |
| Tixagevimab–cilgavimab-TACKLE <sup>20</sup>          | 822   | 46 (sd<br>15.2)      | 455<br>(50)       | 559<br>(62)       | 36<br>(4)    | 468<br>(52)  | 809 (90)       | 108<br>(12)        | 256 (28)     | 388<br>(43)      | 5 | 127 (14)                             | COVI<br>D-19<br>related                  | 28-30 |
| Molnupiravir-MOVE-OUT <sup>21</sup>                  | 1408  | 43<br>(18-90)        | 735<br>(51.3)     | 813<br>(56)       | 75<br>(5)    | 711<br>(49)  | 1424<br>(99.4) | 228<br>(15.9)<br>% | not reported | 1056(73)         | 3 | 620 (23)                             | All<br>cause                             | 28-30 |
| Molnupiravir-PANORAMIC <sup>22</sup>                 | 25000 | 57<br>(18-99)        | 1510<br>1<br>(59) | 2427<br>0<br>(94) | 155<br>(0.6) |              | 17759<br>(69)  | 2195<br>(9)%       | 5782 (22)    | 3912<br>(15)%    | 3 | 25333 (98) 2+<br>doses of<br>vaccine | All<br>cause                             | 28-30 |
| Molnupiravir-Aurobindo <sup>23</sup>                 | 1220  | 36<br>(18-60)        | 468<br>(38)       | 1220<br>(100)     | 0            | 0            | 90 (7.3)       |                    |              |                  | 3 | not reported                         | All<br>cause                             | 28-30 |
| Nirmatrelvir/ritonavir-EPIC-HR <sup>9</sup>          | 2085  | 46<br>(18-88)        | 1098<br>(49)      | 1607<br>(72)      | 110<br>(4.9) | 1010<br>(45) | 2085<br>(100)  | 252<br>(11)        | 739 (33)     | 744<br>(36)      | 3 | 27 (11)                              | COVI<br>D-19<br>related                  | 28-30 |

|                                                                                    |          |                   |              |              |             |              |              |             |          |             |                 |              |                         |       |
|------------------------------------------------------------------------------------|----------|-------------------|--------------|--------------|-------------|--------------|--------------|-------------|----------|-------------|-----------------|--------------|-------------------------|-------|
| Remdesivir-PINETREE <sup>12</sup>                                                  | 562      | 50<br>(12-77+)    | 269<br>(48)  | 452<br>(80)  | 42<br>(7.5) | 235<br>(41)  | 562<br>(100) | 346<br>(62) | 268 (48) | 310<br>(55) | 5               | 9 (3)        | COVI<br>D-19<br>related | 28-30 |
| Interferon Lambda-<br>TOGETHER <sup>24</sup>                                       | 194<br>9 | 43<br>(18-92)     | 1113<br>(57) | 58<br>(3)    | 28<br>(1)   | 1853<br>(95) | 1124<br>(58) | 181<br>(9)  | 581 (30) | 719<br>(37) | 3               | 1107 (58) FV | COVI<br>D-19<br>related | 28    |
| Interferon Lambda-<br>ILIAD <sup>25</sup>                                          | 60       | 46<br>(iqr32-54)  | 35<br>(60)   | 31           | 6           |              | 9            |             |          | 12          | 5               | 5/51 (10)    | COVI<br>D-19<br>related | 14    |
| Interferon Lambda-<br>COVID-Lambda <sup>26</sup>                                   | 120      | 36<br>(18-71)     | 50<br>(42)   | 33<br>(28)   |             | 74 (63)      |              | 12<br>(10)  | 14 (12)  |             | 5 (iqr3-6)      | 49 (41)      | All<br>cause            | 28-30 |
| Sofosbuvir and daclatasvir-<br>SOVODAK <sup>27</sup>                               | 55       | <50               | 29<br>(53)   | 55<br>(100)  |             |              |              |             |          |             | not<br>reported | not reported | All<br>cause            | 28-30 |
| Favipavir-Avi-Mild-19 <sup>28</sup>                                                | 231      | 37<br>(iqr32-44)  | 76<br>(33)   | 231<br>(100) | 0           | 0            |              | 25<br>(11)  | 14 (6)   | 39 (17)     | 3               | not reported | All<br>cause            | 28-30 |
| Favipiravir-Iran <sup>29</sup>                                                     | 77       | 41                | 34           | 77<br>(100)  | 0           | 0            | 11 (14)      | nr          | nr       | nr          | 4               |              | all<br>cause            | 28    |
| Favipiravir-FLARE <sup>30</sup>                                                    | 119      | 40                | 56<br>(47)   | 98<br>(82)   |             |              | 17 (14)      |             |          | 20 (17)     | nr              | 74 (62)      | all<br>cause            | 28    |
| Favipiravir/Lopinavir/Ritonavir-<br>FLARE <sup>30</sup>                            | 121      | 40                | 59<br>(49)   | 99<br>(82)   |             |              | 19 (16)      |             |          | 20 (17)     | nr              | 77 (64)      | all<br>cause            | 28    |
| Lopinavir/Ritonavir-<br>FLARE <sup>30</sup>                                        | 120      | 40                | 60<br>(50)   | 98<br>(82)   |             |              | 16 (13)      |             |          | 20 (17)     | nr              | 74 (62)      | all<br>cause            | 28    |
| Lopinavir/ritonavir-<br>TREAT NOW <sup>31</sup>                                    | 446      | 41<br>(19-75)     | 261<br>(59)  | 354<br>(79)  | 35<br>(8)   | 33 (7)       | 347 (78)     | 17 (4)      | 77 (17)  | 149<br>(35) | 4               | 93 (21)      | All<br>cause            | 29    |
| Lopinavir/ritonavir-<br>TOGETHER <sup>32</sup>                                     | 471      | 53<br>(IQR 18-94) | 255<br>(54)  | 14<br>(3)    | 11<br>(2)   | 428<br>(91)  | 471<br>(100) | 92<br>(20)  | 137 (29) | 198<br>(42) | 6               | not reported | COVI<br>D-19<br>related | 90    |
| Tenofovir Disproxil<br>Fumarate Plus<br>Emtricitabine-AR0-<br>CORONA <sup>33</sup> | 60       | 42                | 34<br>(57)   |              |             |              |              | 2           | 3        |             | 4               |              | all<br>cause            | 14    |

|                                                   |          |                          |             |                  |            |              |               |             |                 |             |   |              |                         |                                                        |
|---------------------------------------------------|----------|--------------------------|-------------|------------------|------------|--------------|---------------|-------------|-----------------|-------------|---|--------------|-------------------------|--------------------------------------------------------|
| Metformin-COVID-OUT <sup>34</sup>                 | 119<br>7 | 46<br>(iqr<br>37-<br>55) | 741<br>(56) | 1091<br>(82)     | 90<br>(7)  |              |               | 26 (2)      | 353<br>cvd (27) | 646<br>(49) | 5 | 690 (52fv)   | COVI<br>D-19<br>related | 28-30                                                  |
| Metformin -TOGETHER <sup>35</sup>                 | 418      | 52<br>(18-<br>90)        | 239<br>(57) | 8 (2)            | 6 (1)      | 381<br>(91)  | 418<br>(100)  | 61<br>(15)  | 167 (40)        | 188<br>(45) | 3 |              | All<br>cause            | 28-30                                                  |
| Fluvoxamine-<br>TOGETHER <sup>11</sup>            | 149<br>7 | <50                      | 862<br>(58) | 1486<br>(99)     | 5 (1)      | 1486<br>(99) | 1497<br>(100) | 243<br>(16) | 194 (13)        | 751<br>(50) | 4 | not reported | COVI<br>D-19<br>related | 28-30                                                  |
| Fluvoxamine-STOP<br>COVID <sup>36</sup>           | 152      | 46                       | 109<br>(72) | 106<br>(70)      | 38<br>(25) | 5 (3)        |               | 17<br>(11)  | 30 (20)         | 75 (49)     | 4 | not reported | COVI<br>D-19<br>related | 15 (2<br>noncov<br>id after<br>day 15<br>to day<br>28) |
| Fluvoxamine-COVID-<br>OUT <sup>34</sup>           | 592      | 44<br>(iqr37<br>-53)     | 358<br>(54) | 539<br>(82)      | 51<br>(8)  |              |               | 7 (1)       | 172<br>cvd (26) | 302<br>(46) | 5 | 373 (56fv)   | COVI<br>D-19<br>related | 28-30                                                  |
| Fluvoxamine ACTIV-6 <sup>37</sup>                 | 128<br>8 | 48<br>(iqr39<br>-58)     | 734<br>(57) | 1038<br>(81)     | 96<br>(7)  | 221<br>(17)  |               | 115<br>(9)  | 304 (24)        | 469<br>(36) | 5 | 861 (67)     | All<br>cause            | 28                                                     |
| Fluvoxamine/budesonide-<br>TOGETHER <sup>38</sup> | 147<br>6 | 51<br>(18-<br>102)       | 898<br>(61) | 36<br>(2)        | 20<br>(1)  | 1419<br>(96) | 1476<br>(100) | 278<br>(19) | 656 (44)        | 597<br>(42) | 3 | 1377 (94)    | All<br>cause            | 28-30                                                  |
| Ivermectin-TOGETHER <sup>39</sup>                 | 134<br>9 | 49                       | 791<br>(58) | 1310<br>(98)     | 12<br>(1)  | 1310<br>(98) | 1349<br>(100) | 180<br>(13) | 114 (8)         | 675<br>(50) | 4 | not reported | COVI<br>D-19<br>related | 28-30                                                  |
| Ivermectin-COVID-OUT <sup>34</sup>                | 730      | 46<br>(iqr37<br>-56)     | 442<br>(55) | 662<br>(82)      | 59<br>(7)  |              |               | 13 (2)      | 184<br>cvd (23) | 383<br>(47) | 5 | 449 (56fv)   | COVI<br>D-19<br>related | 28-30                                                  |
| Ivermectin Iran <sup>40</sup>                     | 549      | 35 (5-<br>87)            | 294<br>(48) | 582<br>(100<br>) | 0          | 0            | 112 (20)      | 42<br>(7.3) | 46 (7.8)        | 101<br>(21) | 3 | not reported | All<br>cause            | not<br>stated                                          |
| Ivermectin-ACTIV-6 <sup>41</sup>                  | 159<br>1 | 47<br>(iqr39<br>-56)     | 932<br>(59) | 1286<br>(81)     | 113(<br>7) | 163<br>(10)  |               | 184         | 415             | 648         | 6 | 753 (fv47)   | All<br>cause            | 28-30                                                  |
| Ivermectin high dose-<br>ACTIV-6 <sup>42</sup>    | 120<br>6 | 48<br>(iqr38<br>-58)     | 713<br>(59) | 909<br>(75)      | 93<br>(8)  | 160<br>(13)  |               | 109<br>(9)  | 317 (27)        | 259<br>(21) | 5 | 1008 (84)    | All<br>cause            | 28                                                     |

|                                                      |      |                |           |           |         |          |            |          |           |           |                |              |                   |       |
|------------------------------------------------------|------|----------------|-----------|-----------|---------|----------|------------|----------|-----------|-----------|----------------|--------------|-------------------|-------|
| Hydroxychloroquine-TOGETHER <sup>32</sup>            | 441  | 53 (IQR 18-81) | 243 (55)  | 422 (96)  | 7 (1)   | 422 (96) | 441 (100)  | 89 (20)  | 210 (48)  | 177 (40)  | 6              | not reported | COVI D-19 related | 90    |
| Hydroxychloroquine-COVID-19 PEP <sup>43</sup>        | 423  | 40 (iqr 32-50) | 238 (56)  | 235 (48)  | 15 (3)  | 28 (6)   |            | 15 (3)   | 46 (11)   |           | 2              | not reported | All cause         | 14    |
| Hydroxychloroquine -AH COVID-19 <sup>44</sup>        | 148  | 47             | 66 (45)   | 51        | 12      |          |            | 29       | 41        |           | 7 (iqr5-8)     | not reported | All cause         | 28-30 |
| Hydroxychloroquine-BCN PEP-CoV-2 <sup>45</sup>       | 293  | 42 (12 sd)     | 201 (69)  |           |         |          | 156 (53)   | 20 (7)   |           |           | 3 (iqr 2-4)    | not reported | All cause         | 28-30 |
| Hydroxychloroquine-BMG <sup>46</sup>                 | 231  | 37 (18-78)     | 131 (57)  | 117 (51)  | 26 (11) | 71 (31)  | 129 (56)   | 17 (7)   | 27 (12)   | 98 (42)   | 6              | not reported | COVI D-19 related | 28-30 |
| Hydroxychloroquine-Utah <sup>47</sup>                | 303  | 42             | 176 (48)  | 165 (45)  | 2 (1)   | 158 (43) | 90 (25)    | 28 (8)   | 52 914)   |           | nr             | nr           | all cause         | 28    |
| Hydroxychloroquine/Azithromycin-Brazil <sup>48</sup> | 84   | 37             | 34        | 44        | 5       | 79       |            | nr       | nr        | nr        | 4              | nr           | all cause         | 21    |
| Nitazoxanide-Romark <sup>49</sup>                    | 379  | 40 (12-83)     | 214 (57)  | 233 (61)  | 8 (2)   | 130 (34) | 238 (63%)  |          |           |           | 2              | 38 (10)      | COVI D-19 related | 28-30 |
| Colchicine-COLCORONA <sup>2</sup>                    | 4488 | 54 (iqr 47-61) | 2421 (54) | 4182 (93) | 233 (5) | <10%     | 4488 (100) | 894 (20) | 1629 (36) | 2052 (46) | 5.3            | not reported | COVI D-19 related | 28-30 |
| Losartan-MN <sup>50</sup>                            | 117  | 38             | 58        | 84        | 8       | 10       |            | 7        | 9         | 42        | 2              |              | all cause         | 28    |
| Niclosamide <sup>51</sup>                            | 67   | 36 mean        | 26 (39)   | 53 (79)   | 4 (6)   | 7 (10)   |            |          | 5 (8)     | 4 (7)     | not reported   | not reported | All cause         | 28-30 |
| Aspirin-ACTIV-4B <sup>52</sup>                       | 280  | 54 (iqr 46-59) | 191 (58)  | 250 (76)  | 36 (11) | 93 (28)  |            | 53 (16)  | 109 (33)  | 164 (50)  | 10 (diagnosis) | not reported | All cause         | 45    |
| 2.5-mg apixaban-ACTIV-4B <sup>52</sup>               | 271  | 54 (iqr 46-59) | 191 (58)  | 255 (78)  | 38 (12) | 91 (28)  |            | 60 (18)  | 120 (37)  | 164 (50)  | 10 (diagnosis) | not reported | All cause         | 45    |
| 5-mg apixaban ACTIV-4B <sup>52</sup>                 | 279  | 54 (iqr        | 198 (6    | 251 (77)  | 36 (11) | 80 (24)  |            | 55 (17)  | 111 (34)  | 164 (50)  | 10 (diagnosis) | not reported | All cause         | 45    |

|                                            |     |               |          |           |         |           |          |             |              |          |              |              |           |       |
|--------------------------------------------|-----|---------------|----------|-----------|---------|-----------|----------|-------------|--------------|----------|--------------|--------------|-----------|-------|
|                                            |     | 46-59)        |          |           |         |           |          |             |              |          |              |              |           |       |
| Sulodexide <sup>53</sup>                   | 243 | 55            | 128 (53) | 243 (100) |         | 243 (100) |          | 50 (21)     | 83 (43)      |          | 3            | not reported | All cause | 21    |
| Enoxaparin-ETHIC <sup>54</sup>             | 219 | 59 (iqr51-66) | 96 (44)  | 129 (59)  | 5 (2)   | 12 (5)    |          | 50/152 (33) | 114/152 (75) | 109 (49) | 5            | not reported | All cause | 21    |
| Enoxaparin-OVID <sup>55</sup>              | 572 | 56 (iqr53-62) | 217 (38) | 446 (78)  | 3 (1)   |           |          | 38 (7)      | 115 (20)     |          | 3 (dx)       | not reported | All cause | 28-30 |
| Inhaled Ciclesonide-COVIS <sup>56</sup>    | 400 | 43 (13-87)    | 221 (55) | 345 (86)  | 47 (12) | 172 (43)  |          | 30 (8)      | 89 (22)      | 200 (50) | NR           |              | all cause | 30    |
| Inhaled ciclesonide-COVERAGE <sup>57</sup> | 217 | 63 (50-86)    | 111 (51) | 217 (100) | 0       | 0         | 157 (72) | 33(16)      | 89 (41)      | 52 (24)  | 4            | not reported | All cause | 28-30 |
| Zinc <sup>58</sup>                         | 108 | 43            | 68       | 73        | 28      |           |          | 10          | 35           | 54       | nr           | nr           | all cause | 28    |
| Ascorbic acid <sup>58</sup>                | 98  | 44            | 64       | 70        | 23      |           |          | 5           | 22           | 49       | nr           | nr           | all cause | 28    |
| Zinc/Ascorbic acid <sup>58</sup>           | 108 | 46            | 62       | 71        | 32      |           |          | 20          | 41           | 54       | nr           | nr           | all cause | 28    |
| Homeopathy-COVID-Simile <sup>59</sup>      | 86  | 41            | 56       |           |         | 86 (100)  |          | 8           | 21           |          | 9            | nr           | all cause | 27    |
| Saliravira <sup>60</sup>                   | 143 | 50 (24-80)    | 59 (41)  | 143 (100) |         |           |          |             | 33 (23)      |          | not reported | not reported | All cause | 23    |
| Azithromycin-Atomic <sup>261</sup>         | 292 | 46            | 143 (49) | 201 (68)  | 11 (4)  |           | 70 (24)  | 25 (9)      | 52 (18)      |          | 6            | not reported | All cause | 28-30 |
| Azithromycin-ACTION <sup>62</sup>          | 197 | 43            | 130 (66) | 169 (86)  | 9 (5)   | 59 (30)   |          | 24 (12)     | 26 (13)      |          | 6            | not reported | All cause | 21    |
| Resveratrol <sup>63</sup>                  | 100 | 55 (45-84)    | 62 (59)  | 93 (89)   | 4 (4)   | 2 (2)     | 32 (30)  | 10 (10)     |              | 50 (50)  | 5            | not reported | All cause | 21    |



**Appendix Table 1b: Additional baseline data from RCTs-Geography, age symptom onset**

| Study                                                | Enrollment Period             | Study months | Geography                                | Enrolled | age over 65 n(%) | age over 60 n(%) | age over 50 n(%) | symptoms <= 8 days n(%) | symptoms <=7 days n(%) | symptoms <= 5 days n(%) | symptoms <= 3 days n(%) |
|------------------------------------------------------|-------------------------------|--------------|------------------------------------------|----------|------------------|------------------|------------------|-------------------------|------------------------|-------------------------|-------------------------|
| CCP-CONV-ert <sup>7</sup>                            | Nov 10 2020 -July 28 2021     | 9            | Spain                                    | 376      |                  |                  | 376 (100)        |                         | 376 (100)              |                         |                         |
| CCP-COV-Early <sup>13</sup>                          |                               |              | Netherlands                              | 406      |                  |                  | 351 (86)         |                         | 406 (100)              |                         |                         |
| CCP-C3PO <sup>4</sup>                                | Aug 2020-Feb 2021             | 7            | USA                                      | 511      |                  |                  | 511 (100)        |                         | 511 (100)              |                         | 246 (48)                |
| CCP-Argentina <sup>5</sup>                           | Jun 4 2020 – Oct 25 2020      | 5            | Argentina                                | 160      | 160 (100)        |                  |                  |                         |                        |                         | 160 (100)               |
| CCP-CSSC-004 <sup>3</sup>                            | June 3 2020-Oct 2021          | 16           | USA                                      | 1225     | 80 (7)           |                  | 410 (35)         | 1181 (100)              |                        | 517 (44)                |                         |
| Bamlanivimab-BLAZE-1 <sup>14</sup>                   | June 2020-Aug 2020            | 3            | USA                                      | 467      | 53 (12)          |                  |                  |                         |                        | 226 (50)mean            |                         |
| Sotrovimab-COMET-ICE <sup>8</sup>                    | Aug 27 2020-March 2021        | 6            | United States, Canada, Brazil, and Spain | 1057     | 211(20)          |                  |                  |                         |                        | 1057 (100)              | 624 (59)                |
| Bamlanivimab/etesevimab-BLAZE-1 <sup>15</sup>        | Sept 2020-Dec 2020            | 3            | USA                                      | 1035     | 323 (31)         |                  |                  | 979 (95)                |                        |                         |                         |
| Casirivimab/imdevimab-REGEN-COV Ph 3 <sup>16</sup>   | Sept 24 2020-Jan 17 2021      | 4            | USA Mexico                               | 2696     | 358 (13)         |                  |                  |                         | 2696 (100)             |                         | 1489 (66)               |
| Casirivimab/imdevimab-REGEN-COV Ph 1/2 <sup>17</sup> | June 16, 2020 - Sept 23, 2020 | 3            | USA                                      | 799      |                  |                  |                  |                         | 799 (100)              | 599 (75)                | 400 (50)                |

|                                                 |                                    |   |                                                 |       |           |             |             |  |               |               |                |
|-------------------------------------------------|------------------------------------|---|-------------------------------------------------|-------|-----------|-------------|-------------|--|---------------|---------------|----------------|
| Bebtelovimab-BLAZE-4 <sup>1</sup>               | May 2021-<br>July 2021             | 3 | USA                                             | 253   | 1 (<1)    |             |             |  | 253 (100)     |               |                |
| Regdanvimab-CT-P59 <sup>18</sup>                | Oct 2020-<br>Dec 2020              | 2 | South<br>Korea,<br>Romania,<br>Spain, USA       | 327   |           | 85<br>(26)  |             |  | 327 (100)     |               |                |
| Regdanvimab-CT-P59-2 <sup>19</sup>              | Jan 18 2021<br>to april 24<br>2021 | 3 | world wide                                      | 1315  |           |             | 297<br>(23) |  |               | 986 (75)      | 329 (25)       |
| Tixagevimab-cilgavimab-<br>TACKLE <sup>20</sup> | Jan 28,<br>2021- July<br>22, 2021, | 6 | USA, Latin<br>America,<br>Europe, and<br>Japan. | 1014  | 116 (13)  |             |             |  | 910 (100)     |               |                |
| Molnupiravir-MOVE-OUT <sup>21</sup>             | May 2021-<br>Oct 2021              | 6 | worldwide                                       | 1433  |           | 246<br>(17) |             |  |               | 1408<br>(100) | 674 (48)       |
| Molnupiravir-PANORAMIC <sup>22</sup>            | Dec 8-2021<br>- April 27,<br>2022  | 5 | UK                                              | 25783 | 6838 (27) |             |             |  |               | 22510<br>(87) |                |
| Molnupiravir-Aurobindo <sup>23</sup>            | July 1, 2021<br>- Aug 24,<br>2021  | 2 | India                                           | 1220  |           |             |             |  |               |               | 661 (54)       |
| Nirmatrelvir/ritonavir-EPIC-HR <sup>9</sup>     | July 1 2021<br>- Dec 2021          | 6 | worldwide                                       | 2246  | 287(12.8) |             |             |  |               | 2246<br>(100) | 1489<br>(66.3) |
| Remdesivir-PINETREE <sup>12</sup>               | Sept 2020-<br>Apr 2021             | 8 | USA,<br>Spain,<br>Denmark<br>UK                 | 562   |           | 170<br>(30) |             |  | 562 (100)     |               |                |
| Interferon Lambda-TOGETHER <sup>24</sup>        | Jun 24<br>2021-feb 7<br>2022       | 8 | Brazil                                          | 1949  |           |             | 752<br>(39) |  | 1949<br>(100) |               | 1158 (59)      |
| Interferon Lambda- ILIAD <sup>25</sup>          | May 18,<br>2020-Sep 4<br>2020      | 4 | Canada                                          | 60    |           |             |             |  | 60 (100)      |               |                |

|                                                                          |                                 |    |                   |      |        |  |             |           |               |           |          |
|--------------------------------------------------------------------------|---------------------------------|----|-------------------|------|--------|--|-------------|-----------|---------------|-----------|----------|
| Interferon Lambda-COVID-Lambda <sup>26</sup>                             | April 25<br>2020-July 7<br>2020 | 2  | USA               | 120  |        |  |             |           |               |           |          |
| Sofosbuvir and daclatasvir-SOVODAK <sup>27</sup>                         | April 8<br>2020-May<br>19 2020  | 1  | Iran              | 55   |        |  |             |           |               |           |          |
| Favipavir-Avi-Mild-19 <sup>28</sup>                                      | July 23,<br>2020- Aug<br>4 2021 | 12 | Saudi<br>Arabia   | 245  |        |  | 30<br>(13)  |           |               | 231 (100) |          |
| Favipiravir-Iran <sup>29</sup>                                           | Dec 5 2020-<br>mar 31<br>2021   | 4  | Iran              | 77   |        |  |             |           | 77 (100)      |           |          |
| Favipiravir-FLARE <sup>30</sup>                                          | Oct 6 2020-<br>Nov 4 2021       | 13 | United<br>Kingdom | 119  |        |  |             |           | 119 (100)     | 76 (64)   |          |
| Favipiravir/Lopinavir/Ritonavir-FLARE <sup>30</sup>                      | Oct 6 2020-<br>Nov 4 2021       | 13 | United<br>Kingdom | 121  |        |  |             |           | 121 (100)     | 80 (66)   |          |
| Lopinavir/Ritonavir-FLARE <sup>30</sup>                                  | Oct 6 2020-<br>Nov 4 2021       | 13 | United<br>Kingdom | 120  |        |  |             |           | 120 (100)     | 75 (63)   |          |
| Lopinavir/ritonavir-TREAT NOW <sup>31</sup>                              | Jun 2020-<br>Dec 2021           | 18 | USA               | 446  | 13 (3) |  | 112<br>(25) |           | 446 (100)     | 349 (78)  | 124 (28) |
| Lopinavir/ritonavir-TOGETHER <sup>32</sup>                               | June 2<br>2020-Oct 9<br>2020    | 4  | Brazil            | 471  |        |  | 275         | 471 (100) |               | 74 (16)   |          |
| Tenofovir Disproxil Fumarate Plus Emtricitabine-AR0-CORONA <sup>33</sup> | Nov 20<br>2020-Mar<br>19 2021   | 4  | France            | 60   |        |  |             |           | 60 (100)      | 45 (75)   |          |
| Metformin-COVID-OUT <sup>34</sup>                                        | Dec 30<br>2020 - Jan<br>28 2022 | 13 | USA               | 1323 |        |  |             |           | 1197<br>(100) |           |          |
| Metformin -TOGETHER <sup>35</sup>                                        | jan 15<br>2021-April<br>13 2021 | 3  | Brazil            | 418  |        |  | 234<br>(56) |           | 418 (100)     |           | 184 (44) |
| Fluvoxamine-TOGETHER <sup>11</sup>                                       | Jan 2021 -<br>Aug 2021          | 8  | Brazil            | 1497 |        |  | 655<br>(44) |           | 1497<br>(100) |           | 638 (43) |

|                                                   |                                   |    |               |      |  |  |             |           |               |           |          |
|---------------------------------------------------|-----------------------------------|----|---------------|------|--|--|-------------|-----------|---------------|-----------|----------|
| Fluvoxamine-STOP COVID <sup>36</sup>              | April 10<br>2020 - Aug<br>5 2020  | 4  | USA           | 152  |  |  |             |           | 152 (100)     | 114 (75)  |          |
| Fluvoxamine-COVID-OUT <sup>34</sup>               | Dec 30<br>2020 - Jan<br>28 2022   | 13 | USA           | 661  |  |  |             |           | 733 (100)     |           |          |
| Fluvoxamine ACTIV-6 <sup>37</sup>                 | Au 6 2021-<br>May 27<br>2022      | 10 | USA           | 1288 |  |  | 541<br>(42) |           | 966 (75)      | 644 (50)  |          |
| Fluvoxamine/budesonide-<br>TOGETHER <sup>38</sup> | Jan 15<br>2022-July 6<br>2022     | 6  | Brazil        | 1476 |  |  | 829<br>(56) |           | 1476<br>(100) |           | 917 (62) |
| Ivermectin-TOGETHER <sup>39</sup>                 | March 23 -<br>Aug 2 2021          | 5  | Brazil        | 1358 |  |  |             |           | 1358<br>(100) |           | 597 (44) |
| Ivermectin-COVID-OUT <sup>34</sup>                | Dec 30<br>2020 - Jan<br>28 2022   | 13 | USA           | 808  |  |  |             |           | 592 (100)     |           |          |
| Ivermectin Iran <sup>40</sup>                     | Feb 19 21 -<br>Aug 30 21          | 7  | iran          | 582  |  |  |             |           |               |           | 291 (50) |
| Ivermectin-ACTIV-6 <sup>41</sup>                  | June 23<br>2021 - Feb<br>4 2022   | 7  | USA           | 1591 |  |  | 680<br>(43) | 1193 (75) |               |           |          |
| Ivermectin high dose-ACTIV-6 <sup>42</sup>        | feb 16<br>2022-July<br>22 2022    | 5  | USA           | 1206 |  |  |             |           | 905 (75)      | 603 (50)  | 302 (25) |
| Hydroxychloroquine-TOGETHER <sup>32</sup>         | June 2<br>2020-Oct 9<br>2020      | 4  | Brazil        | 441  |  |  | 262<br>(59) | 441 (100) |               | 77 (17)   |          |
| Hydroxychloroquine-COVID-19<br>PEP <sup>43</sup>  | March 22<br>2020 - May<br>20 2020 | 2  | USA<br>canada | 491  |  |  | 99<br>(20)  |           |               | 423 (100) |          |
| Hydroxychloroquine -AH COVID-<br>19 <sup>44</sup> | April 15<br>2020 -May<br>22 2020  | 1  | Canada        | 148  |  |  |             |           |               |           |          |

|                                                      |                                  |    |                                                                            |      |   |              |  |           |           |           |           |
|------------------------------------------------------|----------------------------------|----|----------------------------------------------------------------------------|------|---|--------------|--|-----------|-----------|-----------|-----------|
| Hydroxychloroquine-BCN PEP-CoV-2 <sup>45</sup>       | March 17<br>2020-May<br>26 2020  | 2  | Spain                                                                      | 293  |   |              |  |           |           | 293 (100) |           |
| Hydroxychloroquine-BMG <sup>46</sup>                 | April 15<br>2020-July<br>27 2020 | 3  | USA                                                                        | 231  |   | 23<br>(10)   |  |           | 143 (62)  | 85 (37)   |           |
| Hydroxychloroquine-Utah <sup>47</sup>                | Apr 2020-<br>Apr 2021            | 12 | USA                                                                        | 303  |   |              |  |           |           |           |           |
| Hydroxychloroquine/Azithromycin-Brazil <sup>48</sup> | Apr 12<br>2020-May<br>13 2020    | 1  | Brazil                                                                     | 83   |   |              |  |           |           | 84 (100)  |           |
| Nitazoxanide-Romark <sup>49</sup>                    | Aug 2020-<br>Jan 2021            | 5  | USA Puerto<br>rico                                                         | 379  |   |              |  |           |           |           | 379 (100) |
| Colchicine-COLCORONA <sup>2</sup>                    | March<br>2020-Dec<br>2020        | 9  | Brazil,<br>Canada,<br>Greece,<br>South<br>Africa,<br>Spain, and<br>the USA | 4488 |   | 1122<br>(25) |  | 3590 (80) |           |           |           |
| Losartan-MN <sup>50</sup>                            | Apr 2020-<br>Nov 2020            | 8  | USA                                                                        | 117  | 3 |              |  |           | 117 (100) |           | 106       |
| Niclosamide <sup>51</sup>                            | Oct 1 2020-<br>April 20<br>2021  | 7  | USA                                                                        | 73   |   |              |  |           |           |           | 67 (100)  |
| Aspirin-ACTIV-4B <sup>52</sup>                       | Sept 1 2020<br>- June 17<br>2021 | 10 | USA                                                                        | 328  |   | ~82<br>(25)  |  |           |           | 82 (25)   |           |
| 2.5-mg apixaban-ACTIV-4B <sup>52</sup>               | Sept 1 2020<br>- June 17<br>2021 | 10 | USA                                                                        | 329  |   | ~82<br>(25)  |  |           |           | 82 (25)   |           |
| 5-mg apixaban ACTIV-4B <sup>52</sup>                 | Sept 1 2020<br>- June 17<br>2021 | 10 | USA                                                                        | 328  |   | ~82<br>(25)  |  |           |           | 82 (25)   |           |

|                                            |                                     |    |                                                                          |     |  |             |              |  |           |                |           |
|--------------------------------------------|-------------------------------------|----|--------------------------------------------------------------------------|-----|--|-------------|--------------|--|-----------|----------------|-----------|
| Sulodexide <sup>53</sup>                   | June 5 2020<br>- August 5<br>2020   | 2  | Mexico                                                                   | 243 |  |             |              |  |           |                | 243 (100) |
| Enoxaparin-ETHIC <sup>54</sup>             | Oct 27 2020<br>- Nov 8<br>2021      | 12 | Belgium,<br>Brazil,<br>India, South<br>Africa,<br>Spain, and<br>the UK). | 219 |  |             | 164<br>(75)  |  |           | 121 (50)       |           |
| Enoxaparin-OVID <sup>55</sup>              | Aug 5<br>2020-Jan 14<br>2022        | 17 | Switzerland<br>and<br>Germany                                            | 572 |  |             | 572<br>(100) |  |           | 429 (dx<br>75) |           |
| Inhaled Ciclesonide-COVIS <sup>56</sup>    | jun 11<br>2020-nov 3<br>2020        | 5  | USA                                                                      | 400 |  |             |              |  |           |                |           |
| Inhaled ciclesonide-COVERAGE <sup>57</sup> | Dec 29<br>2020-July<br>22 2021      | 7  | France                                                                   | 217 |  | 151<br>(70) | 217<br>(100) |  | 217 (100) |                |           |
| Zinc <sup>58</sup>                         | Apr 27<br>2020-Oct<br>14 2020       | 6  | USA                                                                      | 108 |  |             |              |  |           |                |           |
| Ascorbic acid <sup>58</sup>                | Apr 27<br>2020-Oct<br>14 2020       | 6  | USA                                                                      | 98  |  |             |              |  |           |                |           |
| Zinc/Ascorbic acid <sup>58</sup>           | Apr 27<br>2020-Oct<br>14 2020       | 6  | USA                                                                      | 108 |  |             |              |  |           |                |           |
| Homeopathy-COVID-Simile <sup>59</sup>      | Jun 29<br>2020-Ap 6<br>2021         | 10 | Brazil                                                                   | 86  |  |             |              |  |           |                |           |
| Saliravira <sup>60</sup>                   | Dec 21<br>2020 -<br>March 1<br>2021 | 3  | Iran                                                                     | 143 |  |             |              |  |           |                |           |

|                                   |                                                  |   |     |     |         |           |  |  |           |         |  |
|-----------------------------------|--------------------------------------------------|---|-----|-----|---------|-----------|--|--|-----------|---------|--|
| Azithromycin-Atomic <sup>61</sup> | June 3,<br>2020- Jan<br>29, 2021,                | 8 | UK  | 292 |         |           |  |  |           |         |  |
| Azithromycin-ACTION <sup>62</sup> | May 22<br>2020 -<br>March 16<br>2021             | 9 | USA | 197 |         | 18<br>(9) |  |  | 197 (100) |         |  |
| Resveratrol <sup>63</sup>         | September<br>13, 2020 -<br>December<br>11, 2020, | 3 | USA | 100 | 16 (16) |           |  |  |           | 50 (50) |  |



**Appendix Table 2. Summary of findings table GRADE evaluation by RCT.**

Patient or population: COVID-19 outpatients

Settings: Ambulatory patients with COVID-19

Intervention: COVID-19 convalescent plasma, anti-Spike mAbs, small molecule antivirals and repurposed drugs

Comparison: standard of care, placebo

| Study                                                         | Assumed risk-controls<br>Illustrative comparative risks* (95% CI) | Corresponding risk-Intervention<br>Illustrative comparative risks* (95% CI) | Effect size: OR (95% CI) | No of Participants (studies) | Quality of the evidence (GRADE)                               | Comments                                                                                                                                                                                                       |
|---------------------------------------------------------------|-------------------------------------------------------------------|-----------------------------------------------------------------------------|--------------------------|------------------------------|---------------------------------------------------------------|----------------------------------------------------------------------------------------------------------------------------------------------------------------------------------------------------------------|
| <b>CCP-mITT all cause hospitalization: cumulative results</b> | 120 per 1000                                                      | 82 per 1000 (from 63 to 108)                                                | 0.69(0.53 /0.90)         | 2634 participants (5 RCTs)   | ⊕⊕⊕⊕ high (there are no concerns in any of the GRADE factors) | CCP reduces significantly need of hospitalization compared to placebo. Most information is from results at low risk of bias or with some concerns, but unlikely to lower confidence in the estimate of effect. |
| <b>Anti-spike mAbs: combined results</b>                      | 58.9 per 1000                                                     | 18.8 per 1000 (from 14.7to 22.1)                                            | 0.32(0.25 /0.41)         | 8736 (9 trials)              | ⊕⊕⊕⊖ moderate (downgraded for ROB)                            | Anti-Spike mAbs reduce hospitalization compared to placebo                                                                                                                                                     |
| <b>Small molecule antivirals :</b>                            | 18.3 per 1000                                                     | 14.3 per 1000 (from 8.2 to 24.3)                                            | 0.78(0.45 /1.33)         | 34104 (17)                   | ⊕⊖⊖⊖ very-low (downgraded for imprecision,                    | -It is unclear if antivirals reduce rate of hospitalization compared to placebo                                                                                                                                |

| combined results                         |                |                                    |                  |                                 | inconsistency ( $I^2=69$ ) and ROB)                                          |                                                                          |
|------------------------------------------|----------------|------------------------------------|------------------|---------------------------------|------------------------------------------------------------------------------|--------------------------------------------------------------------------|
| <b>Repurposed drugs combined results</b> | 53.05 per 1000 | 41.9 per 1000 (from 37.1 to 47.7)  | 0.79(0.70 /0.90) | 22512 (39 arms, 21 comparisons) | ⊕⊕⊕⊖ moderate (downgraded for ROB)                                           | Repurposed treatments reduce rate of hospitalization compared to placebo |
| <i>CCP</i>                               |                |                                    |                  |                                 |                                                                              |                                                                          |
| CCP-CONV-ert <sup>7</sup>                | 111 per 1000   | 116 per 1000 (from 61 to 219)      | 1.05 (0.55/1.98) | 376 (1)                         | ⊕⊕⊕⊖ moderate (downgraded for imprecision-95% CI includes line of no effect) | CCP does not reduce hospitalization compared to placebo                  |
| CCP-COV-Early <sup>13</sup>              | 93 per 1000    | 57.6 per 1000 (from 26.9 to 120.9) | 0.62 (0.29/1.30) | 406 (1)                         | ⊕⊕⊕⊖ moderate (downgraded for imprecision-95% CI includes line of no effect) | It is unclear if CCP reduces hospitalization compared to placebo         |
| CCP-C3PO <sup>4</sup>                    | 220 per 1000   | 198 per 1000 (from 127 to 301)     | 0.9 (0.58/1.37)  | 511 (1)                         | ⊕⊕⊕⊖ moderate (downgraded for imprecision-95% CI includes line of no effect) | It is unclear if CCP reduces hospitalization compared to placebo         |
| CCP-Argentina <sup>5</sup>               | 312 per 1000   | 133 per 1000 (from 62 to 180)      | 0.43 (0.20/0.91) | 160 (1)                         | ⊕⊕⊕⊖ moderate (downgraded for imprecision due to low number of participants) | CCP reduces rate of hospitalization compared to placebo                  |
| CCP-CSSC-004 <sup>3</sup>                | 62.8 per 1000  | 27.6 per 1000 (from 15.7 to 49.6)  | 0.44 (0.25/0.79) | 1181 (1)                        | ⊕⊕⊕⊕ high (there are no concerns in any of the GRADE factors)                | CCP reduces rate of hospitalization compared to placebo                  |
| <i>Anti-Spike mAbs</i>                   |                |                                    |                  |                                 |                                                                              |                                                                          |
| Bamlanivimab <sup>14</sup>               | 62.9 per 1000  | 15 per 1000 (from 5 to 46.5)       | 0.24 (0.08/0.74) | 919 (1 RCT)                     | ⊕⊕⊕⊖ moderate (downgraded for imprecision )                                  | Bamlanivimab reduces need of hospitalization compared to placebo         |

|                                                                 |                  |                                        |                         |                   |                                                                                       |                                                                                                        |
|-----------------------------------------------------------------|------------------|----------------------------------------|-------------------------|-------------------|---------------------------------------------------------------------------------------|--------------------------------------------------------------------------------------------------------|
| Sotrovima<br>b-<br>COMET-<br>ICE <sup>23</sup>                  | 56.7 per<br>1000 | 10.7 per 1000<br>(from 4.5 to<br>26)   | 0.19<br>(0.08/0.4<br>6) | 1061 (1<br>RCT)   | ⊕⊕⊕⊖<br>moderate (downgraded<br>for ROB)                                              | Sotrovimab reduces<br>need of hospitalization<br>compared to placebo                                   |
| Bamlanivi<br>mab/etese<br>vimab <sup>15</sup>                   | 69.3 per<br>1000 | 20 per 1000<br>(from 10.3 to<br>40.1)  | 0.29<br>(0.15/0.5<br>8) | 1035 (1<br>RCT)   | ⊕⊕⊕⊖<br>low(downgraded for<br>imprecision and ROB)                                    | Bamlanivimab/etesevi<br>mab in combination<br>reduce need of<br>hospitalization<br>compared to placebo |
| Casirivima<br>b/imdevi<br>mab <sup>16</sup>                     | 41.6 per<br>1000 | 11.6 per 1000<br>(from 7.0 to<br>19.1) | 0.28<br>(0.17/0.4<br>6) | 3495 (2<br>RCT)   | ⊕⊕⊕⊖<br>low (downgraded for<br>ROB and imprecision<br>due to low number of<br>events) | Casirivimab/imdevima<br>b in combination reduce<br>need of hospitalization<br>compared to placebo      |
| Bebtelovi<br>mab-<br>BLAZE-<br>4 <sup>1</sup>                   | 15.6 per<br>1000 | 15.9 per 1000<br>(from 2.1 to<br>115)  | 1.02<br>(0.14/7.3<br>9) | 253 (1<br>RCT)    | ⊕⊕⊕⊖ low<br>(downgraded twice for<br>serious imprecision)                             | Bebtelovimab does not<br>reduce need of<br>hospitalization<br>compared to placebo                      |
| Regdanvi<br>mab <sup>18,19</sup>                                | 79.9 per<br>1000 | 26.3 per 1000<br>(from 5.9 to<br>42.3) | 0.33<br>(0.20/0.5<br>3) | 1622 (2<br>RCTs)  | ⊕⊕⊕⊖<br>moderate (downgraded<br>for ROB)                                              | Regdanviman reduces<br>hospitalization<br>compared to placebo                                          |
| Tixagevi<br>mab-<br>cilgavima<br>b-<br>TACKLE <sup>2</sup><br>0 | 89.1 per<br>1000 | 41.8 per 1000<br>(from 24 to<br>74.7)  | 0.47<br>(0.27/0.8<br>4) | 822 (1)           | ⊕⊕⊕⊖<br>moderate (downgraded<br>for imprecision)                                      | Tixagevimab-<br>cilgavimab reduces<br>hospitalization<br>compared to placebo in<br>unvaccinated adults |
| <i>Small molecule antivirals</i>                                |                  |                                        |                         |                   |                                                                                       |                                                                                                        |
| Molnupira<br>vir <sup>21-23</sup>                               | 11.8 per<br>1000 | 10.8 per 1000<br>(from 8.6 to<br>13.4) | 0.91<br>(0.73/1.1<br>4) | 27628 (3<br>RCTs) | ⊕⊕⊕⊖ low<br>(downgraded for<br>inconsistency and<br>imprecision)                      | It is unclear if<br>Molnupiravir reduces<br>hospitalization<br>compared to placebo                     |
| Nirmatrel<br>vir/ritonav<br>ir <sup>9</sup>                     | 63 per 1000      | 7.5 per 1000<br>(from 3.7 to<br>15.1)  | 0.12<br>(0.06/0.2<br>4) | 2085 (1)          | ⊕⊕⊕⊖ low<br>(downgraded for ROB<br>and imprecision).                                  | Nirmatrelvir/ritonavir<br>reduces hospitalization                                                      |

|                                                            |                |                                    |                   |               |                                                            |                                                                                        |
|------------------------------------------------------------|----------------|------------------------------------|-------------------|---------------|------------------------------------------------------------|----------------------------------------------------------------------------------------|
|                                                            |                |                                    |                   |               |                                                            | compared to placebo in unvaccinated adults                                             |
| Remdesivir <sup>12</sup>                                   | 53 per 1000    | 6.8 per 1000 (from 1.5 to 50.2)    | 0.13 (0.03/0.57)  | 562 (1)       | ⊕⊕⊕⊖ low (downgraded for ROB and imprecision)              | Remdesivir reduces hospitalization compared to placebo                                 |
| Favipiravir <sup>28-30</sup>                               | 18.3 per 1000  | 51.2 per 1000 (from 16.8 to 155.9) | 2.80 (0.92/18.52) | 427 (3)       | ⊕⊕⊕⊖ low (downgraded for serious imprecision)              | Favipiravir does not reduce need of hospitalization compared to placebo                |
| Favipiravir+Lopinavir/r-FLARE <sup>30</sup>                | Not calculable | -                                  | 3.05 (0.12/76.39) | 120 (1)       | ⊕⊕⊕⊖ low (downgraded for serious imprecision)              | Favipiravir+Lopinavir/r does not reduce need of hospitalization compared to placebo    |
| Peg-interferon lambda <sup>24-26</sup>                     | 38.8 per 1000  | 23.2 per 1000 (from 13.9 to 38.4)  | 0.60 (0.36/0.99)  | 2129 (3 RCTs) | ⊕⊕⊕⊖ moderate (downgraded for ROB)                         | -Peginterferon lambda reduces hospitalization compared to placebo.                     |
| Sofosbuvir and daclatasvir- SOVODA K <sup>27</sup>         | 142.8 per 1000 | 32.8 per 1000 (from 2.8 to 315)    | 0.23 (0.02/2.21)  | 55 (1)        | ⊕⊕⊕⊖ low (downgraded for serious imprecision)              | It is unclear if sofosbuvir/daclatasvir reduces hospitalization compared to placebo    |
| Lopinavir/ritonavir <sup>30-32</sup>                       | 33.1 per 1000  | 41.4 per 1000 (from 21.8 to 78.4)  | 1.25 (0.66/2.37)  | 1037 (3)      | ⊕⊕⊕⊖ low (downgraded for serious imprecision)              | Lopinavir/ritonavir does not reduce need of hospitalization compared to placebo        |
| Tenofovir Disproxil Fumarate Plus Emtricitabine-AR0-CORONA | 33.3 per 1000  | 68.9 per 1000 (from 5.9 to 804.1)  | 2.07 (0.18/24.5)  | 60 (1 RCT)    | ⊕⊕⊕⊖ very-low (downgraded for serious imprecision and ROB) | TDF+Emtricitabine does not reduce need of hospitalization compared to standard of care |

|                                                   |                  |                                         |                          |                  |                                                                                    |                                                                                                          |
|---------------------------------------------------|------------------|-----------------------------------------|--------------------------|------------------|------------------------------------------------------------------------------------|----------------------------------------------------------------------------------------------------------|
|                                                   |                  |                                         |                          |                  |                                                                                    |                                                                                                          |
| <i>Repurposed</i>                                 |                  |                                         |                          |                  |                                                                                    |                                                                                                          |
| Metformin-<br>COVID-<br>OUT <sup>34,35</sup>      | 53.4 per<br>1000 | 37.4 per 1000<br>(from 22.9 to<br>60.3) | 0.70<br>(0.43/1.1<br>3)  | 1615 (2<br>RCTs) | ⊕⊕⊕⊕ low<br>(downgraded for<br>imprecision and<br>inconsistency ( $I^2=58$ ))      | It is unclear if<br>metformin reduces<br>hospitalization<br>compared to placebo.                         |
| Fluvoxamine <sup>11,34,36,37</sup>                | 63.6 per<br>1000 | 46.4 per 1000<br>(from 34.3 to<br>62.9) | 0.73<br>(0.54/0.9<br>9)  | 3518 (4<br>RCTs) | ⊕⊕⊕⊕ moderate<br>(downgraded for ROB)                                              | Fluvoxamine reduces<br>hospitalization<br>compared to placebo                                            |
| Fluvoxamine/budesonide-<br>TOGETHER <sup>38</sup> | 10.8 per<br>1000 | 9.4 per 1000<br>(from 3.4 to<br>26.1)   | 0.87<br>(0.32/2.4<br>2)  | 1476 (1<br>RCT)  | ⊕⊕⊕⊕ moderate<br>(downgraded for<br>imprecision )                                  | It is unclear if<br>fluvoxamine/budesonide<br>reduces<br>hospitalization<br>compared to placebo.         |
| Ivermectin <sup>10,34,40-42</sup>                 | 46.3 per<br>1000 | 43.1 per 1000<br>(from 32.8 to<br>56.0) | 0.93<br>(0.71/1.2<br>21) | 5434 (5<br>RCTs) | ⊕⊕⊕⊕ moderate<br>(downgraded for<br>imprecision )                                  | -It is unclear if<br>Ivermectin reduces rate<br>of hospitalization<br>compared to placebo                |
| Hydroxychloroquine <sup>32,43,64-66</sup>         | 44.0per<br>1000  | 38.7 per 1000<br>(from 22.8 to<br>65.1) | 0.74<br>(0.45/1.2<br>3)  | 1536 (6<br>RCTs) | ⊕⊕⊕⊕ moderate (downgraded<br>for imprecision-95% CI<br>includes line of no effect) | It is unclear if<br>hydroxychloroquine<br>reduces hospitalization<br>compared to placebo                 |
| Hydroxychloroquine/azithromycin <sup>48</sup>     | 23.8 per<br>1000 | 23.8 per 1000<br>(from 1.42 to<br>39.2) | 1.00<br>(0.06/16.<br>5)  | 84 (1<br>RCT)    | ⊕⊕⊕⊕ low<br>(downgraded for<br>imprecision and ROB)                                | It is unclear if<br>hydroxychloroquine/azithromycin<br>reduces<br>hospitalization<br>compared to placebo |
| Nitazoxanide-<br>Romark <sup>49</sup>             | 25.6 per<br>1000 | 5.3 per 1000<br>(from 0.5 to<br>45.8)   | 0.21<br>(0.02/1.7<br>9)  | 379 (1)          | ⊕⊕⊕⊕ very-low<br>(downgraded for serious<br>imprecision and ROB)                   | It is unclear if<br>nitazoxanide reduces<br>hospitalization<br>compared to placebo                       |
| Colchicine-                                       | 58.1 per<br>1000 | 45.8 per 1000<br>(from 35.4 to<br>59.8) | 0.79<br>(0.61/1.0<br>3)  | 379 (1)          | ⊕⊕⊕⊕ moderate (downgraded)                                                         | It is unclear if<br>colchicine reduces                                                                   |

|                                         |               |                                     |                   |              |                                                                     |                                                                                                               |
|-----------------------------------------|---------------|-------------------------------------|-------------------|--------------|---------------------------------------------------------------------|---------------------------------------------------------------------------------------------------------------|
| COLCORONA <sup>2</sup>                  |               |                                     |                   |              | for imprecision-95% CI includes line of no effect)                  | hospitalization compared to placebo                                                                           |
| Losartan-MN <sup>50</sup>               | 16.9 per 1000 | 53.5 per 1000 (from 5.4 to 529.6)   | 3.16 (0.32/31.34) | 117 (1 RCT)  | ⊕⊕⊕⊕ very-low (downgraded for serious imprecision and ROB)          | It is unclear if losartan reduces rate of hospitalization compared to placebo                                 |
| Niclosamide <sup>51</sup>               | 29.4 per 1000 | 9.5 per 1000 (from 0.29 to 249)     | 0.33 (0.01/8.48)  | 67 (1)       | ⊕⊕⊕⊕ low (downgraded for serious imprecision)                       | It is unclear if niclosamide reduces hospitalization compared to placebo                                      |
| aspirin <sup>52</sup>                   | 7.3 per 1000  | 6.8 per 1000 (from 0.4 to 11)       | 0.94 (0.06/15.2)  | 280 (1)      | ⊕⊕⊕⊕ very-low (downgraded for serious imprecision and indirectness) | Aspirin does not reduce need of hospitalization compared to placebo                                           |
| apibaxan <sup>52</sup>                  | 7.3 per 1000  | 7.3 per 1000 (from 1 to 52)         | 1.0 (0.14/7.18)   | 414 (2 arms) | ⊕⊕⊕⊕ very-low (downgraded for serious imprecision and indirectness) | Apibaxan 2.5-5 mg does not reduce need of hospitalization compared to placebo                                 |
| Sulodexide <sup>53</sup>                | 294 per 1000  | 223.4 per 1000 (from 82.3 to 279.3) | 0.52 (0.28/0.95)  | 243 (1)      | ⊕⊕⊕⊕ moderate (downgraded for imprecision)                          | Sulodexide reduces hospitalization compared to placebo                                                        |
| Enoxaparin-LMW heparin <sup>54,55</sup> | 56.8 per 1000 | 60.2 per 1000 (from 31.8 to 115.3)  | 1.06 (0.56/2.03)  | 691 (2)      | ⊕⊕⊕⊕ low (downgraded for serious imprecision)                       | LMW heparin does not reduce hospitalization compared to placebo                                               |
| Inhaled ciclesonide <sup>56,57</sup>    | 61.2 per 1000 | 55.1 per 1000 (from 27.5 to 105.2)  | 0.90 (0.45/1.72)  | 599 (2)      | ⊕⊕⊕⊕ very-low (downgraded for serious imprecision and ROB)          | Inhaled ciclesonide does not reduce need of hospitalization compared to placebo                               |
| Zinc <sup>58</sup>                      | 60 per 1000   | 88.8 per 1000 (from 20.4 to 391.2)  | 1.48 (0.34/6.52)  | 108 (1)      | ⊕⊕⊕⊕ very-low (downgraded for serious imprecision and ROB)          | Zinc, ascorbic acid and combination of both did not reduce rate of hospitalization compared with usual care . |
| Ascorbic acid <sup>58</sup>             | 60 per 1000   | 40.8 per 1000 (from 6.6 to 256.2)   | 0.68 (0.11/4.27)  | 98 (1 RCT)   | ⊕⊕⊕⊕ very-low (downgraded for serious imprecision and ROB)          |                                                                                                               |

|                                       |               |                                     |                  |             |                                                                    |                                                                          |
|---------------------------------------|---------------|-------------------------------------|------------------|-------------|--------------------------------------------------------------------|--------------------------------------------------------------------------|
|                                       |               |                                     |                  |             |                                                                    |                                                                          |
| Zinc/Ascorbic acid <sup>58</sup>      | 60 per 1000   | 129 per 1000 (from 31.8 to 528)     | 2.15 (0.53/8.80) | 108 (1 RCT) | ⊕⊕⊕⊕ very-low (downgraded for serious imprecision and ROB)         |                                                                          |
| Homeopathy-COVID-Simile <sup>59</sup> | 68.1 per 1000 | 22.5 per 1000 (from 2.0 to 227.4)   | 0.33 (0.03/3.34) | 86 (1 RCT)  | ⊕⊕⊕⊕ very-low (downgraded for imprecision and serious ROB)         | It is unclear if homeopathy reduces hospitalization compared to placebo  |
| Saliravira <sup>60</sup>              | 285 per 1000  | 133.9 per 1000 (from 82.6 to 220.2) | 0.47 (0.29/0.77) | 143 (1)     | ⊕⊕⊕⊕ very-low (downgraded for serious imprecision and serious ROB) | Saliravira reduces hospitalization compared to control                   |
| Azithromycin <sup>61,62</sup>         | 77.6 per 1000 | 85.3 per 1000 (from 43.4 to 169.1)  | 1.10 (0.56/2.18) | 489 (2)     | ⊕⊕⊕⊕ low (downgraded for serious imprecision)                      | azithromycin does not reduce hospitalization compared to placebo         |
| Resveratrol <sup>63</sup>             | 60 per 1000   | 19.2 per 1000 (from 1.8 to 190.8)   | 0.32 (0.03/3.18) | 100 (1)     | ⊕⊕⊕⊕ low (downgraded for serious imprecision)                      | It is unclear if resveratrol reduces hospitalization compared to placebo |

\*The basis for the assumed risk is the mean control group risk across studies. The corresponding risk (and its 95% confidence interval) is based on the assumed risk in the comparison group and the relative effect (the Risk Difference, also called ARR, absolute risk reduction) of the intervention (and its 95% CI).

GRADE Working Group grades of evidence

High quality: Further research is very unlikely to change our confidence in the estimate of effect.

Moderate quality: Further research is likely to have an important impact on our confidence in the estimate of effect and may change the estimate.

Low quality: Further research is very likely to have an important impact on our confidence in the estimate of effect and is likely to change the estimate.

Very low quality: We are very uncertain about the estimate.

Footnote: OR, Odds Ratio; CIs, confidence intervals; ROB, risk of bias. GRADE, Grading of Recommendations, Assessment, Development and Evaluations



**Appendix Table 3: Hospitalized Odds Ratio statistics**

| Study                                                | Hospitalization Odds ratio | Hospitalization 95 CI low | Hospitalization 95 CI high | Hospitalization significance (p) | Hospitalization z statistic |
|------------------------------------------------------|----------------------------|---------------------------|----------------------------|----------------------------------|-----------------------------|
| <b>Total CCP</b>                                     | <b>0.69</b>                | <b>0.53</b>               | <b>0.90</b>                | <b>0.0035</b>                    | <b>2.697265</b>             |
| <b>Total mAb</b>                                     | <b>0.31</b>                | <b>0.24</b>               | <b>0.4</b>                 | <b>P&lt;0.001</b>                | <b>9.29792</b>              |
| <b>Total antivirals</b>                              | <b>0.78</b>                | <b>0.45</b>               | <b>1.33</b>                | <b>P&lt;0.001</b>                | <b>3.9493</b>               |
| <b>Total repurposed</b>                              | <b>0.82</b>                | <b>0.72</b>               | <b>0.93</b>                | <b>P&lt;0.001</b>                | <b>3.74264</b>              |
| <b>Total</b>                                         | <b>0.67</b>                | <b>0.57</b>               | <b>0.80</b>                | <b>P&lt;0.001</b>                | <b>9.01288</b>              |
| CCP-CONV-ert <sup>7</sup>                            | 1.05                       | 0.56                      | 1.99                       | 0.4356                           | 0.162033                    |
| CCP-COV-Early <sup>13</sup>                          | 0.61                       | 0.29                      | 1.30                       | 0.1021                           | 1.269694                    |
| CCP-C3PO <sup>4</sup>                                | 0.90                       | 0.59                      | 1.37                       | 0.3078                           | 0.502004                    |
| CCP-Argentina <sup>5</sup>                           | 0.43                       | 0.20                      | 0.91                       | 0.0140                           | 2.197789                    |
| CCP-CSSC-004 <sup>3</sup>                            | 0.44                       | 0.25                      | 0.79                       | 0.0031                           | 2.737543                    |
| CCP-Argentina (high titer) <sup>5</sup>              | 0.20                       | 0.06                      | 0.71                       | 0.0132                           | 2.478                       |
| CCP-CSSC-004 (<= 5 days) <sup>3</sup>                | 0.18                       | 0.07                      | 0.49                       | 0.0007                           | 3.38                        |
| Bamlanivimab-BLAZE-1 <sup>14</sup>                   | 0.24                       | 0.08                      | 0.74                       | 0.0066                           | 2.479993                    |
| Sotrovimab-COMET-ICE <sup>8</sup>                    | 0.19                       | 0.08                      | 0.46                       | 0.0001                           | 3.663844                    |
| Bamlanivimab/etesevimab-BLAZE-1 <sup>15</sup>        | 0.29                       | 0.15                      | 0.58                       | 0.0002                           | 3.534471                    |
| Casirivimab/imdevimab-REGEN-COV Ph 3 <sup>16</sup>   | 0.28                       | 0.16                      | 0.47                       | 0.0000                           | 4.734662                    |
| Casirivimab/imdevimab-REGEN-COV Ph 1/2 <sup>17</sup> | 0.30                       | 0.07                      | 1.25                       | 0.0484                           | 1.660556                    |
| Bebtelovimab-BLAZE-4 <sup>1</sup>                    | 1.02                       | 0.14                      | 7.39                       | 0.4905                           | 0.023906                    |
| Regdanvimab-CT-P59 <sup>18</sup>                     | 0.49                       | 0.19                      | 1.27                       | 0.0716                           | 1.463817                    |
| Regdanvimab-CT-P59-2 <sup>19</sup>                   | 0.29                       | 0.16                      | 0.52                       | 0.00001                          | 4.22581                     |
| Tixagevimab-cilgavimab-TACKLE <sup>20</sup>          | 0.47                       | 0.26                      | 0.84                       | 0.0057                           | 2.528551                    |
| Molnupiravir-MOVE-OUT <sup>21</sup>                  | 0.67                       | 0.46                      | 0.99                       | 0.0223                           | 2.00829                     |
| Molnupiravir-PANORAMIC <sup>22</sup>                 | 1.07                       | 0.81                      | 1.42                       | 0.3156                           | 0.479984                    |
| Molnupiravir-Aurobindo <sup>23</sup>                 | NA                         | NA                        | NA                         | NA                               | NA                          |
| Nirmatrelvir/ritonavir-EPIC-HR <sup>9</sup>          | 0.12                       | 0.06                      | 0.24                       | 0.0000                           | 5.731691                    |
| Remdesivir-PINETREE <sup>12</sup>                    | 0.13                       | 0.03                      | 0.57                       | 0.0034                           | 2.703067                    |
| Interferon Lambda-TOGETHER <sup>24</sup>             | 0.47                       | 0.29                      | 0.77                       | 0.0011                           | 3.054966                    |
| Interferon Lambda-ILIAD <sup>25</sup>                | 1.00                       | 0.06                      | 16.76                      | 0.5000                           | 0                           |
| Interferon Lambda-COVID-Lambda <sup>26</sup>         | 1.00                       | 0.14                      | 7.34                       | 0.5000                           | 0                           |
| Sofosbuvir and daclatasvir-SOVODAK <sup>27</sup>     | 0.23                       | 0.02                      | 2.21                       | 0.1018                           | 1.271414                    |

|                                                                          |      |      |       |         |          |
|--------------------------------------------------------------------------|------|------|-------|---------|----------|
| Favipavir-Avi-Mild-19 <sup>28</sup>                                      | 3.31 | 0.65 | 16.76 | 0.0739  | 1.44706  |
| Favipiravir-Iran <sup>29</sup>                                           | 2.18 | 0.37 | 12.65 | 0.19324 | 0.86602  |
| Favipiravir-FLARE <sup>30</sup>                                          | 3.1  | 0.12 | 77.71 | 0.24541 | 0.68902  |
| Favipiravir/Lopinavir/Ritonavir-FLARE <sup>30</sup>                      | 3    | 0.12 | 75.11 | 0.25187 | 0.66863  |
| Lopinavir/Ritonavir-FLARE <sup>30</sup>                                  | 3.05 | 0.12 | 76.39 | 0.24865 | 0.67874  |
| Lopinavir/ritonavir-TREAT NOW <sup>31</sup>                              | 1.21 | 0.4  | 3.64  | 0.37059 | 0.3303   |
| Lopinavir/ritonavir-TOGETHER <sup>32</sup>                               | 1.20 | 0.53 | 2.69  | 0.3333  | 0.430926 |
| Tenofovir Disproxil Fumarate Plus Emtricitabine-AR0-CORONA <sup>33</sup> | 2.07 | 0.18 | 24.15 | 0.28057 | 0.58116  |
| Metformin-COVID-OUT <sup>34</sup>                                        | 0.42 | 0.18 | 0.96  | 0.0198  | 2.057    |
| Metformin -TOGETHER <sup>35</sup>                                        | 0.94 | 0.51 | 1.71  | 0.41626 | 0.21147  |
| Fluvoxamine-TOGETHER <sup>11</sup>                                       | 0.77 | 0.56 | 1.05  | 0.0505  | 1.640023 |
| Fluvoxamine-STOP COVID <sup>36</sup>                                     | 0.06 | 0.00 | 1.15  | 0.0310  | 1.866043 |
| Fluvoxamine-COVID-OUT <sup>34</sup>                                      | 1.18 | 0.36 | 3.91  | 0.3935  | 0.270145 |
| Fluvoxamine ACTIV-6 <sup>37</sup>                                        | 0.45 | 0.04 | 5     | 0.25869 | 0.64738  |
| Fluvoxamine/budesonide-TOGETHER <sup>38</sup>                            | 0.87 | 0.32 | 2.42  | 0.39769 | 0.25933  |
| Ivermectin-TOGETHER <sup>39</sup>                                        | 0.81 | 0.59 | 1.11  | 0.09724 | 1.29742  |
| Ivermectin-COVID-OUT <sup>34</sup>                                       | 0.76 | 0.20 | 2.85  | 0.3414  | 0.408715 |
| Ivermectin Iran <sup>40</sup>                                            | 1.46 | 0.71 | 2.96  | 0.1507  | 1.033341 |
| Ivermectin-ACTIV-6 <sup>41</sup>                                         | 1.05 | 0.43 | 2.61  | 0.4553  | 0.112309 |
| Ivermectin high dose-ACTIV-6 <sup>42</sup>                               | 2.52 | 0.49 | 13.04 | 0.13512 | 1.10252  |
| Hydroxychloroquine-TOGETHER <sup>32</sup>                                | 0.76 | 0.30 | 1.93  | 0.2840  | 0.570928 |
| Hydroxychloroquine-COVID-19 PEP <sup>43</sup>                            | 0.49 | 0.16 | 1.45  | 0.0971  | 1.298164 |
| Hydroxychloroquine -AH COVID-19 <sup>44</sup>                            | 3.14 | 0.17 | 59.70 | 0.2232  | 0.761332 |
| Hydroxychloroquine-BCN PEP-CoV-2 <sup>45</sup>                           | 0.83 | 0.32 | 2.13  | 0.3486  | 0.389184 |
| Hydroxychloroquine-BMG <sup>46</sup>                                     | 0.69 | 0.18 | 2.65  | 0.2945  | 0.54027  |
| Hydroxychloroquine-Utah <sup>47</sup>                                    | 1.77 | 0.51 | 6.19  | 0.18429 | 0.89915  |
| Hydroxychloroquine/Azithromycin-Brazil <sup>48</sup>                     | 1    | 0.06 | 16.5  | 0.5     | 0        |

|                                            |      |      |        |         |          |
|--------------------------------------------|------|------|--------|---------|----------|
| Nitazoxanide-Romark <sup>49</sup>          | 0.21 | 0.02 | 1.79   | 0.0766  | 1.428571 |
| Colchicine-COLCORONA <sup>2</sup>          | 0.79 | 0.61 | 1.03   | 0.0407  | 1.742726 |
| Losartan-MN <sup>50</sup>                  | 3.16 | 0.32 | 31.34  | 0.16245 | 0.98443  |
| Niclosamide <sup>51</sup>                  | 0.33 | 0.01 | 8.48   | 0.2529  | 0.665353 |
| Aspirin-ACTIV-4B <sup>52</sup>             | 0.94 | 0.06 | 15.24  | 0.4838  | 0.040562 |
| 2.5-mg apixaban-ACTIV-4B <sup>52</sup>     | 1.01 | 0.06 | 16.27  | 0.4979  | 0.005238 |
| 5-mg apixaban ACTIV-4B <sup>52</sup>       | 1.91 | 0.17 | 21.36  | 0.2988  | 0.527902 |
| Sulodexide <sup>53</sup>                   | 0.52 | 0.28 | 0.95   | 0.0167  | 2.128119 |
| Enoxaparin-ETHIC <sup>54</sup>             | 1.10 | 0.47 | 2.56   | 0.4155  | 0.213485 |
| Enoxaparin-OVID <sup>55</sup>              | 1.02 | 0.38 | 2.76   | 0.4862  | 0.034489 |
| Inhaled Ciclesonide-COVIS <sup>56</sup>    | 0.48 | 0.12 | 1.87   | 0.14459 | 1.05994  |
| Inhaled ciclesonide-COVERAGE <sup>57</sup> | 1.15 | 0.51 | 2.63   | 0.3659  | 0.34277  |
| Zinc <sup>58</sup>                         | 1.48 | 0.36 | 6.52   | 0.30296 | 0.5159   |
| Ascorbic acid <sup>58</sup>                | 0.68 | 0.11 | 4.27   | 0.34085 | 0.41015  |
| Zinc/Ascorbic acid <sup>58</sup>           | 2.15 | 0.53 | 8.8    | 0.1435  | 1.06472  |
| Homeopathy-COVID-Simile <sup>59</sup>      | 0.33 | 0.03 | 3.34   | 0.17503 | 0.93449  |
| Saliravira <sup>60</sup>                   | 0.01 | 0.00 | 0.24   | 0.0016  | 2.9467   |
| Azithromycin-Atomic2 <sup>61</sup>         | 0.88 | 0.42 | 1.84   | 0.3694  | 0.333472 |
| Azithromycin-ACTION <sup>62</sup>          | 6.62 | 0.36 | 121.45 | 0.1015  | 1.272994 |
| Resveratrol <sup>63</sup>                  | 0.32 | 0.03 | 3.18   | 0.1654  | 0.972432 |

#### Appendix Table 4: Deaths during RCTs

Cumulatively, the CCP RCTs noted 10 deaths in the control arm versus 8 in CCP arm. The anti-Spike mAbs RCTs had 21 total deaths among controls and 4 in the intervention arm. The total for all small molecule antiviral RCTs was 28 in the controls and 7 in the interventions. The repurposed drugs RCTs recorded 72 deaths in the control groups and 53 in the intervention groups.

| Study                                         | ARR %          | RRR %         | 95% CI ARR          | 95% CI RRR         | Odds ratio      | 95 CI low       | 95 CI high           | z statistic | significance (p) |
|-----------------------------------------------|----------------|---------------|---------------------|--------------------|-----------------|-----------------|----------------------|-------------|------------------|
| Total CCP                                     | 0.15           | 20.2          | (-0.48, 0.78)       | (-101.5, 68.4)     | 0.8             | 0.31            | 2.02                 | 0.47848     | 0.31616          |
| Total mAb                                     | 0.45           | 80.8          | (0.21, 0.7)         | (49.4, 92.7)       | 0.19            | 0.07            | 0.5                  | 3.3459      | 0.00041          |
| Total antivirals                              | 0.16           | 87.1          | (0.1, 0.23)         | (63.4, 95.4)       | 0.13            | 0.05            | 0.37                 | 3.85181     | 0.00006          |
| Total repurposed                              | 0.16           | 21.8          | (-0.1, 0.4)         | (-8.3, 43.5)       | 0.78            | 0.56            | 1.08                 | 1.4795      | 0.0695           |
| Total                                         | 0.19           | 44.7          | (0.11, 0.28)        | (27.6, 57.8)       | 0.55            | 0.42            | 0.72                 | 4.29906     | 0.00001          |
| Study                                         | Deaths control | Total control | Deaths intervention | Total intervention | Total both arms | % death control | % death intervention |             |                  |
| Total CCP                                     | 10             | 1315          | 8                   | 1319               | 2634            | 0.76            | 0.61                 |             |                  |
| Total mAb                                     | 23             | 4102          | 5                   | 4634               | 8736            | 0.56            | 0.11                 |             |                  |
| Total antivirals                              | 31             | 17073         | 4                   | 17031              | 34104           | 0.18            | 0.02                 |             |                  |
| Total repurposed                              | 81             | 11109         | 65                  | 11396              | 22505           | 0.73            | 0.57                 |             |                  |
| Total                                         | 131            | 29680         | 72                  | 30363              | 60043           | 0.44            | 0.24                 |             |                  |
| CCP-CONV-ert <sup>7</sup>                     | 2              | 188           | 0                   | 188                | 376             | 1.06            | 0                    |             |                  |
| CCP-COV-Early <sup>13</sup>                   | 0              | 204           | 1                   | 202                | 406             | 0               | 0.5                  |             |                  |
| CCP-C3PO <sup>4</sup>                         | 1              | 254           | 5                   | 257                | 511             | 0.39            | 1.95                 |             |                  |
| CCP-Argentina <sup>5</sup>                    | 4              | 80            | 2                   | 80                 | 160             | 5               | 2.5                  |             |                  |
| CCP-CSSC-004 <sup>3</sup>                     | 3              | 589           | 0                   | 592                | 1181            | 0.51            | 0                    |             |                  |
| Bamlanivimab-BLAZE-1 <sup>14</sup>            | 0              | 143           | 0                   | 309                | 452             | 0               | 0                    |             |                  |
| Sotrovimab-COMET-ICE <sup>8</sup>             | 2              | 529           | 0                   | 528                | 1057            | 0.38            | 0                    |             |                  |
| Bamlanivimab/etesevimab-BLAZE-1 <sup>15</sup> | 10             | 517           | 0                   | 518                | 1035            | 1.93            | 0                    |             |                  |

|                                                                                    |    |           |   |       |           |      |      |  |  |
|------------------------------------------------------------------------------------|----|-----------|---|-------|-----------|------|------|--|--|
| Casirivimab/<br>imdevimab-REGEN-<br>COV Ph 3 <sup>16</sup>                         | 3  | 1341      | 1 | 1355  | 269<br>6  | 0.22 | 0.07 |  |  |
| Casirivimab/<br>imdevimab-REGEN-<br>COV Ph 1/2 <sup>17</sup>                       | 0  | 266       | 0 | 533   | 799       | 0    | 0    |  |  |
| Bebtelovimab-BLAZE-<br>4 <sup>1</sup>                                              | 0  | 128       | 0 | 125   | 253       | 0    | 0    |  |  |
| Regdanvimab-CT-P59 <sup>18</sup>                                                   | 0  | 104       | 0 | 203   | 307       | 0    | 0    |  |  |
| Regdanvimab-CT-P59-<br>2 <sup>19</sup>                                             | 2  | 659       | 1 | 656   | 131<br>5  | 0.3  | 0.15 |  |  |
| Tixagevimab-<br>cilgavimab-TACKLE <sup>20</sup>                                    | 6  | 415       | 3 | 407   | 822       | 1.45 | 0.74 |  |  |
| Molnupiravir-MOVE-<br>OUT <sup>21</sup>                                            | 9  | 699       | 1 | 709   | 140<br>8  | 1.29 | 0.14 |  |  |
| Molnupiravir-<br>PANORAMIC <sup>22</sup>                                           | 5  | 1248<br>4 | 2 | 12516 | 250<br>00 | 0.04 | 0.02 |  |  |
| Molnupiravir-<br>Aurobindo <sup>23</sup>                                           | 0  | 610       | 0 | 610   | 122<br>0  | 0    | 0    |  |  |
| Nirmatrelvir/ritonavir-<br>EPIC-HR <sup>9</sup>                                    | 12 | 1046      | 0 | 1039  | 208<br>5  | 1.15 | 0    |  |  |
| Remdesivir-<br>PINETREE <sup>12</sup>                                              | 1  | 283       | 0 | 279   | 562       | 0.35 | 0    |  |  |
| Interferon Lambda-<br>TOGETHER <sup>24</sup>                                       | 4  | 1018      | 1 | 931   | 194<br>9  | 0.4  | 0.11 |  |  |
| Interferon Lambda-<br>ILIAD <sup>25</sup>                                          | 0  | 30        | 0 | 30    | 60        | 0    | 0    |  |  |
| Interferon Lambda-<br>COVID-Lambda <sup>26</sup>                                   | 0  | 60        | 0 | 60    | 120       | 0    | 0    |  |  |
| Sofosbuvir and<br>daclatasvir-<br>SOVODAK <sup>27</sup>                            | 0  | 28        | 0 | 27    | 55        | 0    | 0    |  |  |
| Favipavir-Avi-Mild-19 <sup>28</sup>                                                | 0  | 119       | 0 | 112   | 231       | 0    | 0    |  |  |
| Favipiravir-Iran <sup>29</sup>                                                     | 0  | 39        | 0 | 38    | 77        | 0    | 0    |  |  |
| Favipiravir-FLARE <sup>30</sup>                                                    | 0  | 60        | 0 | 59    | 119       | 0    | 0    |  |  |
| Favipiravir/Lopinavir/Ri-<br>tonavir-FLARE <sup>30</sup>                           | 0  | 60        | 0 | 61    | 121       | 0    | 0    |  |  |
| Lopinavir/Ritonavir-<br>FLARE <sup>30</sup>                                        | 0  | 60        | 0 | 60    | 120       | 0    | 0    |  |  |
| Lopinavir/ritonavir-<br>TREAT NOW <sup>31</sup>                                    | 0  | 220       | 0 | 226   | 446       | 0    | 0    |  |  |
| Lopinavir/ritonavir-<br>TOGETHER <sup>32</sup>                                     | 0  | 227       | 0 | 244   | 471       | 0    | 0    |  |  |
| Tenofovir Disproxil<br>Fumarate Plus<br>Emtricitabine-AR0-<br>CORONA <sup>33</sup> | 0  | 30        | 0 | 30    | 60        | 0    | 0    |  |  |

|                                                      |    |      |    |      |          |      |      |  |  |
|------------------------------------------------------|----|------|----|------|----------|------|------|--|--|
|                                                      |    |      |    |      |          |      |      |  |  |
| Metformin-COVID-OUT <sup>34</sup>                    | 1  | 601  | 1  | 596  | 119<br>7 | 0.17 | 0.17 |  |  |
| Metformin TOGETHER <sup>35</sup>                     | 9  | 203  | 7  | 215  | 418      | 4.4  | 3.2  |  |  |
| Fluvoxamine-TOGETHER <sup>11</sup>                   | 25 | 756  | 17 | 741  | 149<br>7 | 3.31 | 2.29 |  |  |
| Fluvoxamine-STOP COVID <sup>36</sup>                 | 0  | 72   | 0  | 80   | 152      | 0    | 0    |  |  |
| Fluvoxamine-COVID-OUT <sup>34</sup>                  | 0  | 293  | 0  | 299  | 592      | 0    | 0    |  |  |
| Fluvoxamine ACTIV-6 <sup>37</sup>                    | 0  | 599  | 0  | 662  | 126<br>1 | 0    | 0    |  |  |
| Fluvoxamine/budesonide-TOGETHER <sup>38</sup>        | 0  | 738  | 1  | 738  | 147<br>6 | 0    | 0.14 |  |  |
| Ivermectin-TOGETHER <sup>39</sup>                    | 24 | 675  | 21 | 674  | 134<br>9 | 3.56 | 3.12 |  |  |
| Ivermectin-COVID-OUT <sup>34</sup>                   | 0  | 356  | 1  | 374  | 730      | 0    | 0.27 |  |  |
| Ivermectin Iran <sup>40</sup>                        | 1  | 281  | 1  | 268  | 549      | 0.36 | 0.37 |  |  |
| Ivermectin-ACTIV-6 <sup>41</sup>                     | 0  | 774  | 1  | 817  | 159<br>1 | 0    | 0.12 |  |  |
| Ivermectin high dose-ACTIV-6 <sup>42</sup>           | 0  | 604  | 1  | 602  | 120<br>6 | 0    | 0.17 |  |  |
| Hydroxychloroquine-TOGETHER <sup>32</sup>            | 1  | 227  | 0  | 214  | 441      | 0.44 | 0    |  |  |
| Hydroxychloroquine-COVID-19 PEP <sup>43</sup>        | 1  | 211  | 1  | 212  | 423      | 0.47 | 0.47 |  |  |
| Hydroxychloroquine - AH COVID-19 <sup>44</sup>       | 0  | 37   | 0  | 111  | 148      | 0    | 0    |  |  |
| Hydroxychloroquine-BCN PEP-CoV-2 <sup>45</sup>       | 0  | 157  | 0  | 136  | 293      | 0    | 0    |  |  |
| Hydroxychloroquine-BMG <sup>46</sup>                 | 0  | 83   | 0  | 148  | 231      | 0    | 0    |  |  |
| Hydroxychloroquine-Utah <sup>47</sup>                | 0  | 151  | 0  | 152  | 303      | 0    | 0    |  |  |
| Hydroxychloroquine/Azithromycin-Brazil <sup>48</sup> | 0  | 42   | 0  | 42   | 84       | 0    | 0    |  |  |
| Nitazoxanide-Romark <sup>49</sup>                    | 0  | 195  | 0  | 184  | 379      | 0    | 0    |  |  |
| Colchicine-COLCORONA <sup>2</sup>                    | 9  | 2253 | 5  | 2235 | 448<br>8 | 0.4  | 0.22 |  |  |
| Losartan-MN <sup>50</sup>                            | 0  | 59   | 0  | 58   | 117      | 0    | 0    |  |  |
| Niclosamide <sup>51</sup>                            | 0  | 34   | 0  | 33   | 67       | 0    | 0    |  |  |
| Aspirin-ACTIV-4B <sup>52</sup>                       | 0  | 136  | 0  | 144  | 280      | 0    | 0    |  |  |

|                                                |   |     |   |     |     |      |      |  |  |
|------------------------------------------------|---|-----|---|-----|-----|------|------|--|--|
| 2.5-mg apixaban-<br>ACTIV-4B <sup>52</sup>     | 0 | 136 | 0 | 135 | 271 | 0    | 0    |  |  |
| 5-mg apixaban ACTIV-<br>4B <sup>52</sup>       | 0 | 136 | 0 | 143 | 279 | 0    | 0    |  |  |
| Sulodexide <sup>53</sup>                       | 7 | 119 | 3 | 124 | 243 | 5.88 | 2.42 |  |  |
| Enoxaparin-ETHIC <sup>54</sup>                 | 0 | 114 | 1 | 105 | 219 | 0    | 0.95 |  |  |
| Enoxaparin-OVID <sup>55</sup>                  | 0 | 238 | 0 | 234 | 472 | 0    | 0    |  |  |
| Inhaled Ciclesonide-<br>COVIS <sup>56</sup>    | 0 | 203 | 0 | 197 | 400 | 0    | 0    |  |  |
| Inhaled ciclesonide-<br>COVERAGE <sup>57</sup> | 2 | 107 | 0 | 110 | 217 | 1.87 | 0    |  |  |
| Zinc <sup>58</sup>                             | 0 | 50  | 0 | 58  | 108 | 0    | 0    |  |  |
| Ascorbic acid <sup>58</sup>                    | 0 | 50  | 1 | 48  | 98  | 0    | 2.08 |  |  |
| Zinc/Ascorbic acid <sup>58</sup>               | 0 | 50  | 2 | 58  | 108 | 0    | 3.45 |  |  |
| Homeopathy-COVID-<br>Simile <sup>59</sup>      | 0 | 44  | 0 | 42  | 86  | 0    | 0    |  |  |
| Saliravira <sup>60</sup>                       | 0 | 56  | 0 | 87  | 143 | 0    | 0    |  |  |
| Azithromycin-Atomic2 <sup>61</sup>             | 1 | 147 | 1 | 145 | 292 | 0.68 | 0.69 |  |  |
| Azithromycin-<br>ACTION <sup>62</sup>          | 0 | 72  | 0 | 125 | 197 | 0    | 0    |  |  |
| Resveratrol <sup>63</sup>                      | 0 | 50  | 0 | 50  | 100 | 0    | 0    |  |  |

## Appendix References

1. Dougan M, Azizad M, Chen P, et al. Bebtelovimab, alone or together with bamlanivimab and etesevimab, as a broadly neutralizing monoclonal antibody treatment for mild to moderate, ambulatory COVID-19. *medRxiv* 2022: 2022.03.10.22272100.
2. Tardif JC, Bouabdallaoui N, L'Allier PL, et al. Colchicine for community-treated patients with COVID-19 (COLCORONA): a phase 3, randomised, double-blinded, adaptive, placebo-controlled, multicentre trial. *Lancet Respir Med* 2021; **9**(8): 924-32.
3. Sullivan DJ, Gebo KA, Shoham S, et al. Early Outpatient Treatment for Covid-19 with Convalescent Plasma. *N Engl J Med* 2022.
4. Korley FK, Durkalski-Mauldin V, Yeatts SD, et al. Early Convalescent Plasma for High-Risk Outpatients with Covid-19. *N Engl J Med* 2021; **385**(21): 1951-60.
5. Libster R, Perez Marc G, Wappner D, et al. Early High-Titer Plasma Therapy to Prevent Severe Covid-19 in Older Adults. *N Engl J Med* 2021; **384**(7): 610-8.
6. Millat-Martinez P, Gharbharan A, Alemany A, et al. Prospective individual patient data meta-analysis of two randomized trials on convalescent plasma for COVID-19 outpatients. *Nature Communications* 2022; **13**(1): 2583.
7. Alemany A, Millat-Martinez P, Corbacho-Monne M, et al. High-titre methylene blue-treated convalescent plasma as an early treatment for outpatients with COVID-19: a randomised, placebo-controlled trial. *Lancet Respir Med* 2022; **10**(3): 278-88.
8. Gupta A, Gonzalez-Rojas Y, Juarez E, et al. Early Treatment for Covid-19 with SARS-CoV-2 Neutralizing Antibody Sotrovimab. *N Engl J Med* 2021.
9. Hammond J, Leister-Tebbe H, Gardner A, et al. Oral Nirmatrelvir for High-Risk, Nonhospitalized Adults with Covid-19. *N Engl J Med* 2022; **386**(15): 1397-408.
10. Reis G, Silva E, Silva DCM, et al. Effect of Early Treatment with Ivermectin among Patients with Covid-19. *N Engl J Med* 2022.
11. Reis G, Dos Santos Moreira-Silva EA, Silva DCM, et al. Effect of early treatment with fluvoxamine on risk of emergency care and hospitalisation among patients with COVID-19: the TOGETHER randomised, platform clinical trial. *Lancet Glob Health* 2022; **10**(1): e42-e51.
12. Gottlieb RL, Vaca CE, Paredes R, et al. Early Remdesivir to Prevent Progression to Severe Covid-19 in Outpatients. *N Engl J Med* 2022; **386**(4): 305-15.
13. Gharbharan A, Jordans C, Zwaginga L, et al. Outpatient convalescent plasma therapy for high-risk patients with early COVID-19. A randomized placebo-controlled trial. *Clin Microbiol Infect* 2022.
14. Chen P, Nirula A, Heller B, et al. SARS-CoV-2 Neutralizing Antibody LY-CoV555 in Outpatients with Covid-19. *N Engl J Med* 2021; **384**(3): 229-37.
15. Dougan M, Nirula A, Azizad M, et al. Bamlanivimab plus Etesevimab in Mild or Moderate Covid-19. *N Engl J Med* 2021; **385**(15): 1382-92.
16. Weinreich DM, Sivapalasingam S, Norton T, et al. REGEN-COV Antibody Combination and Outcomes in Outpatients with Covid-19. *N Engl J Med* 2021; **385**(23): e81.
17. Norton T, Ali S, Sivapalasingam S, et al. REGEN-COV Antibody Combination in Outpatients With COVID-19 – Phase 1/2 Results. *medRxiv* 2022: 2021.06.09.21257915.
18. Streinu-Cercel A, Sandulescu O, Preotescu LL, et al. Efficacy and Safety of Regdanvimab (CT-P59): A Phase 2/3 Randomized, Double-Blind, Placebo-Controlled Trial in Outpatients With Mild-to-Moderate Coronavirus Disease 2019. *Open Forum Infect Dis* 2022; **9**(4): ofac053.



19. Kim JY, Sandulescu O, Preotescu LL, et al. A Randomized Clinical Trial of Regdanvimab in High-Risk Patients With Mild-to-Moderate Coronavirus Disease 2019. *Open Forum Infect Dis* 2022; **9**(8): ofac406.
20. Montgomery H, Hobbs FDR, Padilla F, et al. Efficacy and safety of intramuscular administration of tixagevimab-cilgavimab for early outpatient treatment of COVID-19 (TACKLE): a phase 3, randomised, double-blind, placebo-controlled trial. *Lancet Respir Med* 2022; **10**(10): 985-96.
21. Jayk Bernal A, Gomes da Silva MM, Musungaie DB, et al. Molnupiravir for Oral Treatment of Covid-19 in Nonhospitalized Patients. *N Engl J Med* 2022; **386**(6): 509-20.
22. Butler C, Hobbs FDR, Gbinigie O, et al. Molnupiravir Plus Usual Care Versus Usual Care Alone as Early Treatment for Adults with COVID-19 at Increased Risk of Adverse Outcomes (PANORAMIC): Preliminary Analysis from the United Kingdom Randomised, Controlled Open-Label, Platform Adaptive Trial. *SSRN* 2022; **ssrn.4237902**.
23. Tippabhotla SK, Lahiri S, Rama Raju D, Kandi C, Prasad VN. Efficacy and Safety of Molnupiravir for the Treatment of Non-Hospitalized Adults With Mild COVID-19: A Randomized, Open-Label, Parallel-Group Phase 3 Trial. . *SSRN* 2022; **4042673**.
24. Reis G, Moreira Silva EAS, Medeiros Silva DC, et al. Early Treatment with Pegylated Interferon Lambda for Covid-19. *N Engl J Med* 2023; **388**(6): 518-28.
25. Feld JJ, Kandel C, Biondi MJ, et al. Peginterferon lambda for the treatment of outpatients with COVID-19: a phase 2, placebo-controlled randomised trial. *Lancet Respir Med* 2021; **9**(5): 498-510.
26. Jagannathan P, Andrews JR, Bonilla H, et al. Peginterferon Lambda-1a for treatment of outpatients with uncomplicated COVID-19: a randomized placebo-controlled trial. *Nature Communications* 2021; **12**(1): 1967.
27. Roozbeh F, Saeedi M, Alizadeh-Navaei R, et al. Sofosbuvir and daclatasvir for the treatment of COVID-19 outpatients: a double-blind, randomized controlled trial. *Journal of Antimicrobial Chemotherapy* 2020; **76**(3): 753-7.
28. Bosaeed M, Alharbi A, Mahmoud E, et al. Efficacy of favipiravir in adults with mild COVID-19: a randomized, double-blind, multicentre, placebo-controlled clinical trial. *Clin Microbiol Infect* 2022; **28**(4): 602-8.
29. Vaezi A, Salmasi M, Soltaninejad F, Salahi M, Javanmard SH, Amra B. Favipiravir in the Treatment of Outpatient COVID-19: A Multicenter, Randomized, Triple-Blind, Placebo-Controlled Clinical Trial. *Adv Respir Med* 2023; **91**(1): 18-25.
30. Lowe DM, Brown LK, Chowdhury K, et al. Favipiravir, lopinavir-ritonavir, or combination therapy (FLARE): A randomised, double-blind, 2 x 2 factorial placebo-controlled trial of early antiviral therapy in COVID-19. *PLoS Med* 2022; **19**(10): e1004120.
31. Kaizer AM, Shapiro NI, Wild J, et al. Lopinavir/ritonavir for treatment of non-hospitalized patients with COVID-19: a randomized clinical trial. *Int J Infect Dis* 2023; **128**: 223-9.
32. Reis G, Moreira Silva E, Medeiros Silva DC, et al. Effect of Early Treatment With Hydroxychloroquine or Lopinavir and Ritonavir on Risk of Hospitalization Among Patients With COVID-19: The TOGETHER Randomized Clinical Trial. *JAMA Netw Open* 2021; **4**(4): e216468.
33. Parienti JJ, Prazuck T, Peyro-Saint-Paul L, et al. Effect of Tenofovir Disoproxil Fumarate and Emtricitabine on nasopharyngeal SARS-CoV-2 viral load burden amongst outpatients with COVID-19: A pilot, randomized, open-label phase 2 trial. *EClinicalMedicine* 2021; **38**: 100993.

34. Bramante CT, Huling JD, Tignanelli CJ, et al. Randomized Trial of Metformin, Ivermectin, and Fluvoxamine for Covid-19. *N Engl J Med* 2022; **387**(7): 599-610.
35. Reis G, Dos Santos Moreira Silva EA, Medeiros Silva DC, et al. Effect of early treatment with metformin on risk of emergency care and hospitalization among patients with COVID-19: The TOGETHER randomized platform clinical trial. *Lancet Reg Health Am* 2022; **6**: 100142.
36. Lenze EJ, Mattar C, Zorumski CF, et al. Fluvoxamine vs Placebo and Clinical Deterioration in Outpatients With Symptomatic COVID-19: A Randomized Clinical Trial. *JAMA* 2020; **324**(22): 2292-300.
37. McCarthy MW, Naggie S, Boulware DR, et al. Effect of Fluvoxamine vs Placebo on Time to Sustained Recovery in Outpatients With Mild to Moderate COVID-19: A Randomized Clinical Trial. *JAMA* 2023; **329**(4): 296-305.
38. Reis G, Dos Santos Moreira Silva EA, Medeiros Silva DC, et al. Oral Fluvoxamine With Inhaled Budesonide for Treatment of Early-Onset COVID-19 : A Randomized Platform Trial. *Ann Intern Med* 2023; **176**(5): 667-75.
39. Reis G, Silva E, Silva DCM, et al. Effect of Early Treatment with Ivermectin among Patients with Covid-19. *N Engl J Med* 2022; **386**(18): 1721-31.
40. Rezai MS, Ahangarkani F, Hill A, et al. Non-effectiveness of Ivermectin on Inpatients and Outpatients With COVID-19; Results of Two Randomized, Double-Blinded, Placebo-Controlled Clinical Trials. *Front Med (Lausanne)* 2022; **9**: 919708.
41. Naggie S, Boulware DR, Lindsell CJ, et al. Effect of Ivermectin vs Placebo on Time to Sustained Recovery in Outpatients With Mild to Moderate COVID-19: A Randomized Clinical Trial. *JAMA* 2022; **328**(16): 1595-603.
42. Naggie S, Boulware DR, Lindsell CJ, et al. Effect of Higher-Dose Ivermectin for 6 Days vs Placebo on Time to Sustained Recovery in Outpatients With COVID-19: A Randomized Clinical Trial. *JAMA* 2023; **329**(11): 888-97.
43. Skipper CP, Pastick KA, Engen NW, et al. Hydroxychloroquine in Nonhospitalized Adults With Early COVID-19 : A Randomized Trial. *Ann Intern Med* 2020; **173**(8): 623-31.
44. Schwartz I, Boesen ME, Cerchiaro G, et al. Assessing the efficacy and safety of hydroxychloroquine as outpatient treatment of COVID-19: a randomized controlled trial. *CMAJ Open* 2021; **9**(2): E693-E702.
45. Mitja O, Reis G, Boulware DR, et al. Hydroxychloroquine for treatment of non-hospitalized adults with COVID-19: A meta-analysis of individual participant data of randomized trials. *Clin Transl Sci* 2023; **16**(3): 524-35.
46. Johnston C, Brown ER, Stewart J, et al. Hydroxychloroquine with or without azithromycin for treatment of early SARS-CoV-2 infection among high-risk outpatient adults: A randomized clinical trial. *EClinicalMedicine* 2021; **33**: 100773.
47. Spivak AM, Barney BJ, Greene T, et al. A Randomized Clinical Trial Testing Hydroxychloroquine for Reduction of SARS-CoV-2 Viral Shedding and Hospitalization in Early Outpatient COVID-19 Infection. *Microbiol Spectr* 2023; **11**(2): e0467422.
48. Rodrigues C, Freitas-Santos RS, Levi JE, et al. Hydroxychloroquine plus azithromycin early treatment of mild COVID-19 in an outpatient setting: a randomized, double-blinded, placebo-controlled clinical trial evaluating viral clearance. *Int J Antimicrob Agents* 2021; **58**(5): 106428.
49. Rossignol JF, Bardin MC, Fulgencio J, Mogelnicki D, Brechot C. A randomized double-blind placebo-controlled clinical trial of nitazoxanide for treatment of mild or moderate COVID-19. *EClinicalMedicine* 2022; **45**: 101310.

50. Puskarich MA, Cummins NW, Ingraham NE, et al. A multi-center phase II randomized clinical trial of losartan on symptomatic outpatients with COVID-19. *EClinicalMedicine* 2021; **37**: 100957.
51. Cairns DM, Dulko D, Griffiths JK, et al. Efficacy of Niclosamide vs Placebo in SARS-CoV-2 Respiratory Viral Clearance, Viral Shedding, and Duration of Symptoms Among Patients With Mild to Moderate COVID-19: A Phase 2 Randomized Clinical Trial. *JAMA Network Open* 2022; **5**(2): e2144942-e.
52. Connors JM, Brooks MM, Sciurba FC, et al. Effect of Antithrombotic Therapy on Clinical Outcomes in Outpatients With Clinically Stable Symptomatic COVID-19: The ACTIV-4B Randomized Clinical Trial. *JAMA* 2021; **326**(17): 1703-12.
53. Gonzalez-Ochoa AJ, Raffetto JD, Hernandez AG, et al. Sulodexide in the Treatment of Patients with Early Stages of COVID-19: A Randomized Controlled Trial. *Thromb Haemost* 2021; **121**(7): 944-54.
54. Cools F, Virdone S, Sawhney J, et al. Thromboprophylactic low-molecular-weight heparin versus standard of care in unvaccinated, at-risk outpatients with COVID-19 (ETHIC): an open-label, multicentre, randomised, controlled, phase 3b trial. *Lancet Haematol* 2022; **9**(8): e594-e604.
55. Barco S, Voci D, Held U, et al. Enoxaparin for primary thromboprophylaxis in symptomatic outpatients with COVID-19 (OVID): a randomised, open-label, parallel-group, multicentre, phase 3 trial. *Lancet Haematol* 2022; **9**(8): e585-e93.
56. Clemency BM, Varughese R, Gonzalez-Rojas Y, et al. Efficacy of Inhaled Ciclesonide for Outpatient Treatment of Adolescents and Adults With Symptomatic COVID-19: A Randomized Clinical Trial. *JAMA Intern Med* 2022; **182**(1): 42-9.
57. Duvignaud A, Lhomme E, Onaisi R, et al. Inhaled ciclesonide for outpatient treatment of COVID-19 in adults at risk of adverse outcomes: a randomised controlled trial (COVERAGE). *Clin Microbiol Infect* 2022; **28**(7): 1010-6.
58. Thomas S, Patel D, Bittel B, et al. Effect of High-Dose Zinc and Ascorbic Acid Supplementation vs Usual Care on Symptom Length and Reduction Among Ambulatory Patients With SARS-CoV-2 Infection: The COVID A to Z Randomized Clinical Trial. *JAMA Netw Open* 2021; **4**(2): e210369.
59. Adler UC, Adler MS, Padula AEM, et al. Homeopathy for COVID-19 in primary care: A randomized, double-blind, placebo-controlled trial (COVID-Simile study). *J Integr Med* 2022; **20**(3): 221-9.
60. Khorshiddoust RR, Khorshiddoust SR, Hosseinabadi T, et al. Efficacy of a multiple-indication antiviral herbal drug (Saliravira(R)) for COVID-19 outpatients: A pre-clinical and randomized clinical trial study. *Biomed Pharmacother* 2022; **149**: 112729.
61. Hinks TSC, Cureton L, Knight R, et al. Azithromycin versus standard care in patients with mild-to-moderate COVID-19 (ATOMIC2): an open-label, randomised trial. *Lancet Respir Med* 2021; **9**(10): 1130-40.
62. Oldenburg CE, Pinsky BA, Brogdon J, et al. Effect of Oral Azithromycin vs Placebo on COVID-19 Symptoms in Outpatients With SARS-CoV-2 Infection: A Randomized Clinical Trial. *JAMA* 2021; **326**(6): 490-8.
63. McCreary MR, Schnell PM, Rhoda DA. Randomized double-blind placebo-controlled proof-of-concept trial of resveratrol for outpatient treatment of mild coronavirus disease (COVID-19). *Sci Rep* 2022; **12**(1): 10978.

64. Mitjà O, Corbacho-Monné M, Ubals M, et al. Hydroxychloroquine for Early Treatment of Adults With Mild Coronavirus Disease 2019: A Randomized, Controlled Trial. *Clinical Infectious Diseases* 2020; **73**(11): e4073-e81.
65. Schwartz I, Boesen ME, Cerchiaro G, et al. Assessing the efficacy and safety of hydroxychloroquine as outpatient treatment of COVID-19: a randomized controlled trial. 2021; **9**(2): E693-E702.
66. Johnston C, Brown ER, Stewart J, et al. Hydroxychloroquine with or without azithromycin for treatment of early SARS-CoV-2 infection among high-risk outpatient adults: A randomized clinical trial. *Eclinicalmedicine* 2021; **33**.
